# Supplementary material
Source: ML conference proceedings conference paper supplement (https://www.ecva.net/papers/eccv_2020/papers_ECCV/html/123470375_ECCV_2020_paper.php)
Supplement: Supplementary file 202 [file 123470375-supp.zip]

TO DO
