# Supplementary material
Source: ML conference proceedings conference paper supplement (https://www.ecva.net/papers/eccv_2020/papers_ECCV/html/123470375_ECCV_2020_paper.php)
Supplement: Supplementary file 216 [file 123470375-supp.zip]

Archive with 361 entries (314 files):
- 3482-sup/
- 3482-sup/0-paper/
- 3482-sup/0-paper/3482-supp.bbl
- 3482-sup/0-paper/3482-supp.pdf
- 3482-sup/0-paper/3482-supp.tex
- 3482-sup/0-paper/README.txt
- 3482-sup/0-paper/comment.sty
- 3482-sup/0-paper/eso-pic.sty
- 3482-sup/0-paper/figures/
- 3482-sup/0-paper/figures/0ECCV/
- 3482-sup/0-paper/figures/0ECCV/ECCV_HeInit_ME_gradOutput.pdf
- 3482-sup/0-paper/figures/0ECCV/ECCV_HeInit_ME_input.pdf
- 3482-sup/0-paper/figures/0ECCV/ECCV_RandInit_ME_gradOutput.pdf
- 3482-sup/0-paper/figures/0ECCV/ECCV_RandInit_ME_input.pdf
- 3482-sup/0-paper/figures/0ECCV/ECCV_c_k50_gradOutput.pdf
- 3482-sup/0-paper/figures/0ECCV/ECCV_c_k50_input.pdf
- 3482-sup/0-paper/figures/0ECCV/ECCV_c_k80_gradOutput.pdf
- 3482-sup/0-paper/figures/0ECCV/ECCV_c_k80_input.pdf
- 3482-sup/0-paper/figures/0ECCV/Figure2_Condition_k80.pdf
- 3482-sup/0-paper/figures/0ECCV/compare_preres_d1202_W.pdf
- 3482-sup/0-paper/figures/0ECCV/compare_preres_d1202_gWeight.pdf
- 3482-sup/0-paper/figures/0ECCV/compare_preres_d1202_input.pdf
- 3482-sup/0-paper/figures/0ECCV/compare_preres_d1202_loss.pdf
- 3482-sup/0-paper/figures/2FIM_ap/
- 3482-sup/0-paper/figures/2FIM_ap/Figure1_sgd_ME.pdf
- 3482-sup/0-paper/figures/2FIM_ap/Figure1_sgd_c.pdf
- 3482-sup/0-paper/figures/2FIM_ap/Figure1_sgd_loss.pdf
- 3482-sup/0-paper/figures/2FIM_ap/Figure2_all_ME.pdf
- 3482-sup/0-paper/figures/2FIM_ap/Figure2_all_c.pdf
- 3482-sup/0-paper/figures/2FIM_ap/Figure2_block_ME.pdf
- 3482-sup/0-paper/figures/2FIM_ap/Figure2_block_ap_ME.pdf
- 3482-sup/0-paper/figures/2FIM_ap/Figure2_block_ap_c.pdf
- 3482-sup/0-paper/figures/2FIM_ap/Figure2_block_c.pdf
- 3482-sup/0-paper/figures/2FIM_ap/Figure2_input_ME.pdf
- 3482-sup/0-paper/figures/2FIM_ap/Figure2_input_c.pdf
- 3482-sup/0-paper/figures/2Stochasity/
- 3482-sup/0-paper/figures/2Stochasity/1LR_test.png
- 3482-sup/0-paper/figures/2Stochasity/1LR_train.png
- 3482-sup/0-paper/figures/2Stochasity/Sample-BN.pdf
- 3482-sup/0-paper/figures/4BNvsLN/
- 3482-sup/0-paper/figures/4BNvsLN/DyingNode.pdf
- 3482-sup/0-paper/figures/4BNvsLN/Eig_Distri_LNvsBN.pdf
- 3482-sup/0-paper/figures/4BNvsLN/Figure5_LNvsBN_ME.pdf
- 3482-sup/0-paper/figures/4BNvsLN/eig_HeInit.pdf
- 3482-sup/0-paper/figures/4BNvsLN/ratio_layer_Heinit.pdf
- 3482-sup/0-paper/figures/4BNvsLN/ratio_sgd_Heinit.pdf
- 3482-sup/0-paper/figures/DyingNode.pdf
- 3482-sup/0-paper/figures/Figure1_a_ME.pdf
- 3482-sup/0-paper/figures/Figure1_b_C.pdf
- 3482-sup/0-paper/figures/Figure2_Condition.pdf
- 3482-sup/0-paper/figures/Figure2_ME.pdf
- 3482-sup/0-paper/figures/MLP_b1024/
- 3482-sup/0-paper/figures/MLP_b1024/Figure1_b1024_HeInit_loss.pdf
- 3482-sup/0-paper/figures/MLP_b1024/Figure1_b1024_RandInit_loss.pdf
- 3482-sup/0-paper/figures/MLP_b1024/Figure2/
- 3482-sup/0-paper/figures/MLP_b1024/Figure2/C_layer20_HeInit_iterationView_lrDot1_ME_gradOutput.pdf
- 3482-sup/0-paper/figures/MLP_b1024/Figure2/C_layer20_HeInit_iterationView_lrDot1_ME_input.pdf
- 3482-sup/0-paper/figures/MLP_b1024/Figure2/C_layer20_HeInit_iterationView_lrDot1_c_gradOutput.pdf
- 3482-sup/0-paper/figures/MLP_b1024/Figure2/C_layer20_HeInit_iterationView_lrDot1_c_input.pdf
- 3482-sup/0-paper/figures/MLP_b1024/Figure3_b1024_HeInit_loss.pdf
- 3482-sup/0-paper/figures/MLP_b1024/Figure3_b1024_RandInit_loss.pdf
- 3482-sup/0-paper/figures/MLP_b1024/Figure4_b1024_HeInit_loss.pdf
- 3482-sup/0-paper/figures/MLP_b1024/Figure4_b1024_RandInit_loss.pdf
- 3482-sup/0-paper/figures/MLP_full/
- 3482-sup/0-paper/figures/MLP_full/C_layer20_HeInit_layerView_lrDot1_ME_i_go.pdf
- 3482-sup/0-paper/figures/MLP_full/C_layer20_HeInit_layerView_lrDot1_ME_perge.pdf
- 3482-sup/0-paper/figures/MLP_full/C_layer20_HeInit_layerView_lrDot1_c_gradOutput.pdf
- 3482-sup/0-paper/figures/MLP_full/C_layer20_HeInit_layerView_lrDot1_c_input.pdf
- 3482-sup/0-paper/figures/MLP_full/C_layer20_layerView_lrDot1_ME_i_go.pdf
- 3482-sup/0-paper/figures/MLP_full/C_layer20_layerView_lrDot1_ME_perge.pdf
- 3482-sup/0-paper/figures/MLP_full/C_layer20_layerView_lrDot1_c_gradOutput.pdf
- 3482-sup/0-paper/figures/MLP_full/C_layer20_layerView_lrDot1_c_input.pdf
- 3482-sup/0-paper/figures/MLP_full/Figure1_ME_HeInit.pdf
- 3482-sup/0-paper/figures/MLP_full/Figure1_ME_Iter_layer16_HeInit.pdf
- 3482-sup/0-paper/figures/MLP_full/Figure1_ME_Iter_layer16_RandInit.pdf
- 3482-sup/0-paper/figures/MLP_full/Figure1_ME_RandomInit.pdf
- 3482-sup/0-paper/figures/MLP_full/Figure1_b59999_HeInit_loss.pdf
- 3482-sup/0-paper/figures/MLP_full/Figure1_b59999_RandInit_loss.pdf
- 3482-sup/0-paper/figures/MLP_full/Figure2/
- 3482-sup/0-paper/figures/MLP_full/Figure2/C_layer20_HeInit_iterationView_lrDot1_ME_gradOutput.pdf
- 3482-sup/0-paper/figures/MLP_full/Figure2/C_layer20_HeInit_iterationView_lrDot1_ME_input.pdf
- 3482-sup/0-paper/figures/MLP_full/Figure2/C_layer20_HeInit_iterationView_lrDot1_c_gradOutput.pdf
- 3482-sup/0-paper/figures/MLP_full/Figure2/C_layer20_HeInit_iterationView_lrDot1_c_input.pdf
- 3482-sup/0-paper/figures/MLP_full/Figure2_c_HeInit.pdf
- 3482-sup/0-paper/figures/MLP_full/Figure2_c_Iter_layer16_HeInit.pdf
- 3482-sup/0-paper/figures/MLP_full/Figure2_c_RandomInit.pdf
- 3482-sup/0-paper/figures/MLP_full/Figure3/
- 3482-sup/0-paper/figures/MLP_full/Figure3/Figure3_HeInit_layerView_lrDot1_ME_i_go.pdf
- 3482-sup/0-paper/figures/MLP_full/Figure3/Figure3_HeInit_layerView_lrDot1_ME_merge.pdf
- 3482-sup/0-paper/figures/MLP_full/Figure3/Figure3_HeInit_layerView_lrDot1_c_gradOutput.pdf
- 3482-sup/0-paper/figures/MLP_full/Figure3/Figure3_HeInit_layerView_lrDot1_c_input.pdf
- 3482-sup/0-paper/figures/MLP_full/Figure3/Figure3_b59999_HeInit_loss.pdf
- 3482-sup/0-paper/figures/MLP_full/Figure3/Figure3_layerView_lrDot1_ME_i_go.pdf
- 3482-sup/0-paper/figures/MLP_full/Figure3/Figure3_layerView_lrDot1_ME_merge.pdf
- 3482-sup/0-paper/figures/MLP_full/Figure3_HeInit_Condition.pdf
- 3482-sup/0-paper/figures/MLP_full/Figure3_HeInit_ME.pdf
- 3482-sup/0-paper/figures/MLP_full/Figure3_RandInit_Condition.pdf
- 3482-sup/0-paper/figures/MLP_full/Figure3_RandInit_ME.pdf
- 3482-sup/0-paper/figures/MLP_full/Figure3_b59999_HeInit_loss.pdf
- 3482-sup/0-paper/figures/MLP_full/Figure3_b59999_RandInit_loss.pdf
- 3482-sup/0-paper/figures/MLP_full/Figure4/
- 3482-sup/0-paper/figures/MLP_full/Figure4/Figure4_HeInit_layerView_lrDot1_ME_i_go.pdf
- 3482-sup/0-paper/figures/MLP_full/Figure4/Figure4_HeInit_layerView_lrDot1_ME_merge.pdf
- 3482-sup/0-paper/figures/MLP_full/Figure4/Figure4_HeInit_layerView_lrDot1_c_gradOutput.pdf
- 3482-sup/0-paper/figures/MLP_full/Figure4/Figure4_HeInit_layerView_lrDot1_c_input.pdf
- 3482-sup/0-paper/figures/MLP_full/Figure4/Figure4_layerView_lrDot1_ME_i_go.pdf
- 3482-sup/0-paper/figures/MLP_full/Figure4/Figure4_layerView_lrDot1_ME_merge.pdf
- 3482-sup/0-paper/figures/MLP_full/Figure4/Figure4_layerView_lrDot1_c_gradOutput.pdf
- 3482-sup/0-paper/figures/MLP_full/Figure4/Figure4_layerView_lrDot1_c_input.pdf
- 3482-sup/0-paper/figures/MLP_full/Figure4_b59999_HeInit_loss.pdf
- 3482-sup/0-paper/figures/MLP_full/Figure4_b59999_RandInit_loss.pdf
- 3482-sup/0-paper/figures/MLP_full/backup/
- 3482-sup/0-paper/figures/MLP_full/backup/C_layer20_HeInit_layerView_lrDot1_ME_i_go.pdf
- 3482-sup/0-paper/figures/MLP_full/backup/C_layer20_HeInit_layerView_lrDot1_ME_perge.pdf
- 3482-sup/0-paper/figures/MLP_full/backup/C_layer20_HeInit_layerView_lrDot1_c_gradOutput.pdf
- 3482-sup/0-paper/figures/MLP_full/backup/C_layer20_HeInit_layerView_lrDot1_c_input.pdf
- 3482-sup/0-paper/figures/MLP_full/backup/C_layer20_layerView_lrDot1_ME_i_go.pdf
- 3482-sup/0-paper/figures/MLP_full/backup/C_layer20_layerView_lrDot1_ME_perge.pdf
- 3482-sup/0-paper/figures/MLP_full/backup/C_layer20_layerView_lrDot1_c_gradOutput.pdf
- 3482-sup/0-paper/figures/MLP_full/backup/C_layer20_layerView_lrDot1_c_input.pdf
- 3482-sup/0-paper/figures/MLP_full/backup/Figure1_b59999_HeInit_loss.pdf
- 3482-sup/0-paper/figures/MLP_full/backup/Figure1_b59999_RandInit_loss.pdf
- 3482-sup/0-paper/figures/MLP_full/backup/Figure2/
- 3482-sup/0-paper/figures/MLP_full/backup/Figure2/C_layer20_HeInit_iterationView_lrDot1_ME_gradOutput.pdf
- 3482-sup/0-paper/figures/MLP_full/backup/Figure2/C_layer20_HeInit_iterationView_lrDot1_ME_input.pdf
- 3482-sup/0-paper/figures/MLP_full/backup/Figure2/C_layer20_HeInit_iterationView_lrDot1_c_gradOutput.pdf
- 3482-sup/0-paper/figures/MLP_full/backup/Figure2/C_layer20_HeInit_iterationView_lrDot1_c_input.pdf
- 3482-sup/0-paper/figures/MLP_full/backup/Figure3/
- 3482-sup/0-paper/figures/MLP_full/backup/Figure3/Figure3_HeInit_layerView_lrDot1_ME_i_go.pdf
- 3482-sup/0-paper/figures/MLP_full/backup/Figure3/Figure3_HeInit_layerView_lrDot1_ME_merge.pdf
- 3482-sup/0-paper/figures/MLP_full/backup/Figure3/Figure3_HeInit_layerView_lrDot1_c_gradOutput.pdf
- 3482-sup/0-paper/figures/MLP_full/backup/Figure3/Figure3_HeInit_layerView_lrDot1_c_input.pdf
- 3482-sup/0-paper/figures/MLP_full/backup/Figure3/Figure3_b59999_HeInit_loss.pdf
- 3482-sup/0-paper/figures/MLP_full/backup/Figure3/Figure3_b59999_RandInit_loss.pdf
- 3482-sup/0-paper/figures/MLP_full/backup/Figure3/Figure3_layerView_lrDot1_ME_i_go.pdf
- 3482-sup/0-paper/figures/MLP_full/backup/Figure3/Figure3_layerView_lrDot1_ME_merge.pdf
- 3482-sup/0-paper/figures/MLP_full/backup/Figure3/Figure3_layerView_lrDot1_c_gradOutput.pdf
- 3482-sup/0-paper/figures/MLP_full/backup/Figure3/Figure3_layerView_lrDot1_c_input.pdf
- 3482-sup/0-paper/figures/MLP_full/backup/Figure4/
- 3482-sup/0-paper/figures/MLP_full/backup/Figure4/Figure4_HeInit_layerView_lrDot1_ME_i_go.pdf
- 3482-sup/0-paper/figures/MLP_full/backup/Figure4/Figure4_HeInit_layerView_lrDot1_ME_merge.pdf
- 3482-sup/0-paper/figures/MLP_full/backup/Figure4/Figure4_HeInit_layerView_lrDot1_c_gradOutput.pdf
- 3482-sup/0-paper/figures/MLP_full/backup/Figure4/Figure4_HeInit_layerView_lrDot1_c_input.pdf
- 3482-sup/0-paper/figures/MLP_full/backup/Figure4/Figure4_layerView_lrDot1_ME_i_go.pdf
- 3482-sup/0-paper/figures/MLP_full/backup/Figure4/Figure4_layerView_lrDot1_ME_merge.pdf
- 3482-sup/0-paper/figures/MLP_full/backup/Figure4/Figure4_layerView_lrDot1_c_gradOutput.pdf
- 3482-sup/0-paper/figures/MLP_full/backup/Figure4/Figure4_layerView_lrDot1_c_input.pdf
- 3482-sup/0-paper/figures/MLP_full/backup/Figure4_b59999_HeInit_loss.pdf
- 3482-sup/0-paper/figures/MLP_full/backup/Figure4_b59999_RandInit_loss.pdf
- 3482-sup/0-paper/figures/OpenOne/
- 3482-sup/0-paper/figures/OpenOne/figure_MLP_trainAccu_lr0.1_d1024_5_RandInit_nl2_.png
- 3482-sup/0-paper/figures/OpenOne/figure_MLP_trainAccu_lr0.5_d1024_5_RandInit_nl2_.png
- 3482-sup/0-paper/figures/OpenOne/figure_MLP_trainAccu_lr1_d1024_5_RandInit_nl2_.png
- 3482-sup/0-paper/figures/ResNet/
- 3482-sup/0-paper/figures/ResNet/BN_Eigen_ME_gWeight.pdf
- 3482-sup/0-paper/figures/ResNet/BN_Eigen_ME_input.pdf
- 3482-sup/0-paper/figures/ResNet/BN_Eigen_weightNorm.pdf
- 3482-sup/0-paper/figures/ResNet/C10_Accu.pdf
- 3482-sup/0-paper/figures/ResNet/C10_ResNet_loss.pdf
- 3482-sup/0-paper/figures/ResNet/C10_ResNet_s8_loss.pdf
- 3482-sup/0-paper/figures/ResNet/C10_loss.pdf
- 3482-sup/0-paper/figures/ResNet/Eigen.pdf
- 3482-sup/0-paper/figures/ResNet/Eigen_Loss_C10.pdf
- 3482-sup/0-paper/figures/ResNet/Eigen_weightNorm.pdf
- 3482-sup/0-paper/figures/ResNet/F1_Loss_C10.pdf
- 3482-sup/0-paper/figures/ResNet/compare_d1202_W.pdf
- 3482-sup/0-paper/figures/ResNet/compare_d1202_gWeight.pdf
- 3482-sup/0-paper/figures/ResNet/compare_d1202_input.pdf
- 3482-sup/0-paper/figures/ResNet/compare_d1202_loss.pdf
- 3482-sup/0-paper/figures/control/
- 3482-sup/0-paper/figures/control/Figure_batch_00001_loss.pdf
- 3482-sup/0-paper/figures/control/Figure_batch_00001_test.pdf
- 3482-sup/0-paper/figures/control/Figure_batch_00001_train.pdf
- 3482-sup/0-paper/figures/control/Figure_batch_10000_loss.pdf
- 3482-sup/0-paper/figures/control/sgd/
- 3482-sup/0-paper/figures/control/sgd/figure_MLP_trainAccu_lr0.1_d1024_5_RandInit_nl2_.png
- 3482-sup/0-paper/figures/todo.pdf
- 3482-sup/0-paper/figures_sup/
- 3482-sup/0-paper/figures_sup/0ECCV/
- 3482-sup/0-paper/figures_sup/0ECCV/AP/
- 3482-sup/0-paper/figures_sup/0ECCV/AP/ECCV_Figure1_h36_l4_AH_all.pdf
- 3482-sup/0-paper/figures_sup/0ECCV/AP/ECCV_Figure1_h36_l4_AH_layer1.pdf
- 3482-sup/0-paper/figures_sup/0ECCV/AP/ECCV_Figure1_h36_l4_AH_layer2.pdf
- 3482-sup/0-paper/figures_sup/0ECCV/AP/ECCV_Figure1_h36_l4_AH_layer3.pdf
- 3482-sup/0-paper/figures_sup/0ECCV/AP/ECCV_Figure1_h36_l4_AH_layer4.pdf
- 3482-sup/0-paper/figures_sup/0ECCV/AP/ECCV_Figure1_h36_l4_FIM_all.pdf
- 3482-sup/0-paper/figures_sup/0ECCV/AP/ECCV_Figure1_h36_l4_FIM_layer1.pdf
- 3482-sup/0-paper/figures_sup/0ECCV/AP/ECCV_Figure1_h36_l4_FIM_layer2.pdf
- 3482-sup/0-paper/figures_sup/0ECCV/AP/ECCV_Figure1_h36_l4_FIM_layer3.pdf
- 3482-sup/0-paper/figures_sup/0ECCV/AP/ECCV_Figure1_h36_l4_FIM_layer4.pdf
- 3482-sup/0-paper/figures_sup/0ECCV/AP/ECCV_Figure1_l4_AH_all.pdf
- 3482-sup/0-paper/figures_sup/0ECCV/AP/ECCV_Figure1_l4_AH_layer1.pdf
- 3482-sup/0-paper/figures_sup/0ECCV/AP/ECCV_Figure1_l4_AH_layer2.pdf
- 3482-sup/0-paper/figures_sup/0ECCV/AP/ECCV_Figure1_l4_AH_layer3.pdf
- 3482-sup/0-paper/figures_sup/0ECCV/AP/ECCV_Figure1_l4_AH_layer4.pdf
- 3482-sup/0-paper/figures_sup/0ECCV/AP/ECCV_Figure1_l4_FIM_all.pdf
- 3482-sup/0-paper/figures_sup/0ECCV/AP/ECCV_Figure1_l4_FIM_layer1.pdf
- 3482-sup/0-paper/figures_sup/0ECCV/AP/ECCV_Figure1_l4_FIM_layer2.pdf
- 3482-sup/0-paper/figures_sup/0ECCV/AP/ECCV_Figure1_l4_FIM_layer3.pdf
- 3482-sup/0-paper/figures_sup/0ECCV/AP/ECCV_Figure1_l4_FIM_layer4.pdf
- 3482-sup/0-paper/figures_sup/0ECCV/ECCV_P0_c_gradOutput.pdf
- 3482-sup/0-paper/figures_sup/0ECCV/ECCV_P0_c_input.pdf
- 3482-sup/0-paper/figures_sup/0ECCV/ECCV_res_c_gradOutput.pdf
- 3482-sup/0-paper/figures_sup/0ECCV/ECCV_res_c_input.pdf
- 3482-sup/0-paper/figures_sup/0ECCV/MLP_Adam/
- 3482-sup/0-paper/figures_sup/0ECCV/MLP_Adam/ECCV_sup_adam_ME_RandInit_gradOutput.pdf
- 3482-sup/0-paper/figures_sup/0ECCV/MLP_Adam/ECCV_sup_adam_ME_RandInit_input.pdf
- 3482-sup/0-paper/figures_sup/0ECCV/MLP_Adam/ECCV_sup_adam_b1024_RandInit_loss.pdf
- 3482-sup/0-paper/figures_sup/0ECCV/MLP_Adam/ECCV_sup_adam_c80_RandInit_gradOutput.pdf
- 3482-sup/0-paper/figures_sup/0ECCV/MLP_Adam/ECCV_sup_adam_c80_RandInit_input.pdf
- 3482-sup/0-paper/figures_sup/0ECCV/MLP_SGD/
- 3482-sup/0-paper/figures_sup/0ECCV/MLP_SGD/ECCV_HeInit_ME_gradOutput.pdf
- 3482-sup/0-paper/figures_sup/0ECCV/MLP_SGD/ECCV_HeInit_ME_input.pdf
- 3482-sup/0-paper/figures_sup/0ECCV/MLP_SGD/ECCV_RandInit_ME_gradOutput.pdf
- 3482-sup/0-paper/figures_sup/0ECCV/MLP_SGD/ECCV_RandInit_ME_input.pdf
- 3482-sup/0-paper/figures_sup/0ECCV/MLP_SGD/ECCV_plot_sup_b1024_c_k80_HeInit_gradOutput.pdf
- 3482-sup/0-paper/figures_sup/0ECCV/MLP_SGD/ECCV_plot_sup_b1024_c_k80_HeInit_input.pdf
- 3482-sup/0-paper/figures_sup/0ECCV/MLP_SGD/ECCV_plot_sup_b1024_c_k_HeInit_gradOutput.pdf
- 3482-sup/0-paper/figures_sup/0ECCV/MLP_SGD/ECCV_plot_sup_b1024_c_k_HeInit_input.pdf
- 3482-sup/0-paper/figures_sup/Conv/
- 3482-sup/0-paper/figures_sup/Conv/P0_ME_Iter_layer16_HeInit.pdf
- 3482-sup/0-paper/figures_sup/Conv/P0_ME_depth20.pdf
- 3482-sup/0-paper/figures_sup/Conv/P0_condition_depth20.pdf
- 3482-sup/0-paper/figures_sup/Conv/P0_loss_layer20.pdf
- 3482-sup/0-paper/figures_sup/Conv/Res_ME_Iter_layer16_HeInit.pdf
- 3482-sup/0-paper/figures_sup/Conv/Res_ME_depth20.pdf
- 3482-sup/0-paper/figures_sup/Conv/Res_c_depth20.pdf
- 3482-sup/0-paper/figures_sup/Conv/res_loss_layer20.pdf
- 3482-sup/0-paper/figures_sup/DeepResidual/
- 3482-sup/0-paper/figures_sup/DeepResidual/C100_d110.pdf
- 3482-sup/0-paper/figures_sup/DeepResidual/C100_d1202.pdf
- 3482-sup/0-paper/figures_sup/DeepResidual/C100_d230.pdf
- 3482-sup/0-paper/figures_sup/DeepResidual/C100_d56.pdf
- 3482-sup/0-paper/figures_sup/DeepResidual/C10_d110.pdf
- 3482-sup/0-paper/figures_sup/DeepResidual/C10_d1202.pdf
- 3482-sup/0-paper/figures_sup/DeepResidual/C10_d230.pdf
- 3482-sup/0-paper/figures_sup/DeepResidual/C10_d56.pdf
- 3482-sup/0-paper/figures_sup/DeepResidual/Debug_C10_Eigen_s8.pdf
- 3482-sup/0-paper/figures_sup/DeepResidual/Debug_C10_Eigen_weightNorm_s8.pdf
- 3482-sup/0-paper/figures_sup/DeepResidual/Debug_C10_loss_s8.pdf
- 3482-sup/0-paper/figures_sup/DeepResidual/ImageNet_d18.pdf
- 3482-sup/0-paper/figures_sup/DeepResidual/ImageNet_d50.pdf
- 3482-sup/0-paper/figures_sup/Figure4_b59999_HeInit_loss.pdf
- 3482-sup/0-paper/figures_sup/Figure4_var_c_HeInit_gradOutput.pdf
- 3482-sup/0-paper/figures_sup/Figure4_var_c_HeInit_input.pdf
- 3482-sup/0-paper/figures_sup/Figure4_var_c_Iter_layer16_GradOuput.pdf
- 3482-sup/0-paper/figures_sup/Figure4_var_c_Iter_layer16_input.pdf
- 3482-sup/0-paper/figures_sup/MLP-F/
- 3482-sup/0-paper/figures_sup/MLP-F/Figure1_AH_all.pdf
- 3482-sup/0-paper/figures_sup/MLP-F/Figure1_AH_layer1.pdf
- 3482-sup/0-paper/figures_sup/MLP-F/Figure1_AH_layer2.pdf
- 3482-sup/0-paper/figures_sup/MLP-F/Figure1_AH_layer3.pdf
- 3482-sup/0-paper/figures_sup/MLP-F/Figure1_AH_layer4.pdf
- 3482-sup/0-paper/figures_sup/MLP-F/Figure1_AH_layer5.pdf
- 3482-sup/0-paper/figures_sup/MLP-F/Figure1_AH_layer6.pdf
- 3482-sup/0-paper/figures_sup/MLP-F/Figure1_AH_layer7.pdf
- 3482-sup/0-paper/figures_sup/MLP-F/Figure1_AH_layer8.pdf
- 3482-sup/0-paper/figures_sup/MLP-F/Figure1_FIM_all.pdf
- 3482-sup/0-paper/figures_sup/MLP-F/Figure1_FIM_layer1.pdf
- 3482-sup/0-paper/figures_sup/MLP-F/Figure1_FIM_layer2.pdf
- 3482-sup/0-paper/figures_sup/MLP-F/Figure1_FIM_layer3.pdf
- 3482-sup/0-paper/figures_sup/MLP-F/Figure1_FIM_layer4.pdf
- 3482-sup/0-paper/figures_sup/MLP-F/Figure1_FIM_layer5.pdf
- 3482-sup/0-paper/figures_sup/MLP-F/Figure1_FIM_layer6.pdf
- 3482-sup/0-paper/figures_sup/MLP-F/Figure1_FIM_layer7.pdf
- 3482-sup/0-paper/figures_sup/MLP-F/Figure1_FIM_layer8.pdf
- 3482-sup/0-paper/figures_sup/b1024/
- 3482-sup/0-paper/figures_sup/b1024/B1024_ME_HeInit.pdf
- 3482-sup/0-paper/figures_sup/b1024/B1024_ME_Iter_layer16_HeInit.pdf
- 3482-sup/0-paper/figures_sup/b1024/B1024_ME_Iter_layer16_RandInit.pdf
- 3482-sup/0-paper/figures_sup/b1024/B1024_ME_RandomInit.pdf
- 3482-sup/0-paper/figures_sup/b1024/B1024_c_HeInit.pdf
- 3482-sup/0-paper/figures_sup/b1024/B1024_c_Iter_layer16_HeInit.pdf
- 3482-sup/0-paper/figures_sup/b1024/Figure1_b1024_HeInit_loss.pdf
- 3482-sup/0-paper/figures_sup/b1024/Figure1_b1024_RandInit_loss.pdf
- 3482-sup/0-paper/figures_sup/centerRand/
- 3482-sup/0-paper/figures_sup/centerRand/Figure3_b59999_RandInit_loss.pdf
- 3482-sup/0-paper/figures_sup/centerRand/Figure3_layerView_lrDot1_c_gradOutput.pdf
- 3482-sup/0-paper/figures_sup/centerRand/Figure3_layerView_lrDot1_c_input.pdf
- 3482-sup/0-paper/figures_sup/control_CNN/
- 3482-sup/0-paper/figures_sup/control_CNN/Figure_BN_NS_00001_loss.pdf
- 3482-sup/0-paper/figures_sup/control_CNN/Figure_BN_NS_00001_test.pdf
- 3482-sup/0-paper/figures_sup/control_CNN/Figure_BN_NS_00001_train.pdf
- 3482-sup/0-paper/figures_sup/control_CNN/Figure_BN_NS_10000_loss.pdf
- 3482-sup/0-paper/figures_sup/control_CNN/Figure_BN_NS_10000_test.pdf
- 3482-sup/0-paper/figures_sup/control_CNN/Figure_BN_NS_10000_train.pdf
- 3482-sup/0-paper/figures_sup/explosion/
- 3482-sup/0-paper/figures_sup/explosion/CNN_110.pdf
- 3482-sup/0-paper/figures_sup/explosion/MLP_100.pdf
- 3482-sup/0-paper/figures_sup/imageNet/
- 3482-sup/0-paper/figures_sup/imageNet/c_go.pdf
- 3482-sup/0-paper/figures_sup/imageNet/c_input.pdf
- 3482-sup/0-paper/figures_sup/imageNet/loss.pdf
- 3482-sup/0-paper/history.txt
- 3482-sup/0-paper/llncs.cls
- 3482-sup/0-paper/ruler.sty
- 3482-sup/0-paper/splncs.bst
- 3482-sup/0-paper/splncs04.bst
- 3482-sup/1-Code/
- 3482-sup/1-Code/Cifar/
[truncated: 61 more entries]
