# Supplementary material
Source: ML conference proceedings conference paper supplement (https://www.ecva.net/papers/eccv_2020/papers_ECCV/html/123470375_ECCV_2020_paper.php)
Supplement: Supplementary file 216 [file 123470375-supp.zip › 3482-sup/0-paper/3482-supp.bbl]

\begin{thebibliography}{1}
\providecommand{\url}[1]{\texttt{#1}}
\providecommand{\urlprefix}{URL }
\providecommand{\doi}[1]{https://doi.org/#1}

\bibitem{2009_ImageNet}
Deng, J., Dong, W., Socher, R., Li, L.J., Li, K., Fei-Fei, L.: {ImageNet: A
  Large-Scale Hierarchical Image Database}. In: CVPR (2009)

\bibitem{2015_ICCV_He}
He, K., Zhang, X., Ren, S., Sun, J.: Delving deep into rectifiers: Surpassing
  human-level performance on imagenet classification. In: {ICCV} (2015)

\bibitem{2015_CVPR_He}
He, K., Zhang, X., Ren, S., Sun, J.: Deep residual learning for image
  recognition. In: CVPR (2016)

\bibitem{2016_CoRR_He}
He, K., Zhang, X., Ren, S., Sun, J.: Identity mappings in deep residual
  networks. In: ECCV (2016)

\bibitem{1991_Matrix}
Horn, R.A., Johnson, C.A.: Topics in Matrix Analysis. Cambridge University
  Press (1991)

\bibitem{2015_ICML_Ioffe}
Ioffe, S., Szegedy, C.: Batch normalization: Accelerating deep network training
  by reducing internal covariate shift. In: ICML (2015)

\bibitem{2014_CoRR_Kingma}
Kingma, D.P., Ba, J.: Adam: {A} method for stochastic optimization. CoRR
  \textbf{abs/1412.6980} (2014)

\bibitem{1998_NN_Yann}
LeCun, Y., Bottou, L., Orr, G.B., M\"{u}ller, K.R.: Effiicient backprop. In:
  Neural Networks: Tricks of the Trade. pp. 9--50 (1998)

\bibitem{2018_NIPS_Li}
Li, H., Xu, Z., Taylor, G., Studer, C., Goldstein, T.: Visualizing the loss
  landscape of neural nets. In: NeurIPS (2018)

\end{thebibliography}
