# Supplementary material
Source: ML conference proceedings conference paper supplement (https://www.ecva.net/papers/eccv_2020/papers_ECCV/html/123470375_ECCV_2020_paper.php)
Supplement: Supplementary file 216 [file 123470375-supp.zip › 3482-sup/0-paper/3482-supp.tex]

\documentclass[runningheads]{llncs}
\usepackage{graphicx}
\usepackage{comment}
\usepackage{amsmath,amssymb} % define this before the line numbering.
\usepackage{color}

% INITIAL SUBMISSION - The following two lines are NOT commented
% CAMERA READY - Comment OUT the following two lines
%\usepackage{ruler}
%\usepackage[width=122mm,left=12mm,paperwidth=146mm,height=193mm,top=12mm,paperheight=217mm]{geometry}

%\usepackage{times}
\usepackage{epsfig}
%\input{math_commands.tex}

\usepackage{url}            % simple URL typesetting
\usepackage{booktabs}       % professional-quality tables
\usepackage{subfigure}
\usepackage{booktabs} % for professional tables
\usepackage{amsfonts}       % blackboard math symbols
\usepackage{nicefrac}       % compact symbols for 1/2, etc.
\usepackage{microtype}      % microtypography

\newcommand{\theHalgorithm}{\arabic{algorithm}}


%\usepackage{hyperref}       % hyperlinks


% Recommended, but optional, packages for figures and better typesetting:

\usepackage{array}
\usepackage{enumitem}
% hyperref makes hyperlinks in the resulting PDF.
% If your build breaks (sometimes temporarily if a hyperlink spans a page)
% please comment out the following usepackage line and replace
%\usepackage{hyperref}


%\usepackage{amsthm}


\usepackage[pagebackref=true,breaklinks=true,letterpaper=true,colorlinks,bookmarks=false]{hyperref}

\newtheorem{defn}{Definition}
%\newtheorem{theorem}{Theorem}
%\newtheorem{proposition}{Proposition}
%\newtheorem{corollary}[theorem]{Corollary}
%\newtheorem{property}[theorem]{Property}
%\newtheorem{assumption}[theorem]{Assumption}
%\newtheorem{example}{Example}[section]
%\newtheorem{lemma}{Lemma}[section]

%\newcommand{\TODO}[1]{\textcolor{black}{}\textcolor{black}{\textbf{\emph{#1}}}}
\newcommand{\TODO}[1]{\textcolor{red}{TODO:}\textcolor{red}{\emph{#1}}}
%\newcommand{\TODO}[1]{\textcolor{blue}{}\textcolor{blue}{\emph{#1}}}


%\newcommand{\revise}[1]{\textcolor{red}{}\textcolor{red}{#1}}
\newcommand{\revise}[1]{#1}

\newcommand{\mf}{\mathbf}

\newcommand{\D}[1]{\frac{\partial \mathcal{L}}{\partial #1 }}
\newcommand{\hatD}[1]{\frac{\partial \widehat{\mathcal{L}}}{\partial #1 }}
\newcommand{\Dl}[1]{\frac{\partial \ell}{\partial #1}}


\newcommand{\x}[1]{\mathbf{x}_{#1}}
\newcommand{\h}[1]{\mathbf{h}_{#1}}
\newcommand{\s}[1]{\mathbf{s}_{#1}}
\newcommand{\z}[1]{\mathbf{z}_{#1}}
\newcommand{\y}[1]{\mathbf{y}_{#1}}
\newcommand{\W}[1]{\mathbf{W}_{#1}}

\newcommand{\hz}[1]{\hat{\mathbf{z}}_{#1}}
\newcommand{\hatx}[1]{\widehat{\mathbf{x}}_{#1}}
\newcommand{\hath}[1]{\widehat{\mathbf{h}}_{#1}}
\newcommand{\hats}[1]{\widehat{\mathbf{s}}_{#1}}
\newcommand{\hatW}[1]{\widehat{\mathbf{W}}_{#1}}

\newcommand{\Loss}{\mathcal{L}(\theta)}
\newcommand{\TLoss}{\widetilde{\mathcal{L}}(\theta,\mathbf{z})}


\def\eg{\emph{e.g.}}
\def\Eg{\emph{E.g.}}
\def\ie{\emph{i.e.}}
\def\Ie{\emph{I.e.}}
\def\cf{\emph{c.f.}}
\def\Cf{\emph{C.f.}}
\def\etc{\emph{etc.}}
\def\vs{\emph{vs}}
\def\wrt{w.r.t.}
\def\dof{d.o.f}
\def\etal{\emph{et al.}}


\renewcommand{\thesection}{\Alph{section}}
\renewcommand{\thetable}{\Alph{table}}
\renewcommand{\thefigure}{\Roman{figure}}
\begin{document}

\pagestyle{headings}
\mainmatter
\def\ECCVSubNumber{3482}  % Insert your submission number here

\title{Supplementary Materials: \\
	Layer-wise Conditioning Analysis in Exploring the Learning Dynamics of DNNs} % Replace with your title

% INITIAL SUBMISSION
\begin{comment}
\titlerunning{ECCV-20 submission ID \ECCVSubNumber}
\authorrunning{ECCV-20 submission ID \ECCVSubNumber}
\author{Anonymous ECCV submission}
\institute{Paper ID \ECCVSubNumber}
\end{comment}
%******************

% CAMERA READY SUBMISSION
%\begin{comment}
\titlerunning{SM: Layer-wise Conditioning Analysis}
% If the paper title is too long for the running head, you can set
% an abbreviated paper title here
%
\author{Lei Huang$^{1}$ \quad Jie Qin$^{1}$ \quad  Li Liu$^{1}$ \quad Fan Zhu$^{1}$  \quad Ling Shao$^{2,1}$}
%\author{First Author\inst{1}\orcidID{0000-1111-2222-3333} \and
%Second Author\inst{2,3}\orcidID{1111-2222-3333-4444} \and
%Third Author\inst{3}\orcidID{2222--3333-4444-5555}}
%
\authorrunning{Huang et al.}
% First names are abbreviated in the running head.
% If there are more than two authors, 'et al.' is used.
%
\institute{$^{1}$Inception Institute of Artificial Intelligence (IIAI), Abu Dhabi, UAE\\
$^{2}$Mohamed bin Zayed University of Artificial Intelligence, Abu Dhabi, UAE\\
\email{\{lei.huang, jie.qin, li.liu, fan.zhu,  ling.shao\}@inceptioniai.org}
%\url{http://www.springer.com/gp/computer-science/lncs} \and
%ABC Institute, Rupert-Karls-University Heidelberg, Heidelberg, Germany\\
%\email{\{abc,lncs\}@uni-heidelberg.de}
}
%\end{comment}
%******************
\maketitle

\section{Proof of Theorems}
\label{Sec-Proof}


In this section, we provide proofs for the three theorems in the  paper. For completeness, we provide notations described in the  paper again. We consider a Multiple Layer Perceptron (MLP), $f_{\theta}(\mathbf{x})$,  represented as a layer-wise linear and nonlinear transform, as follows:
%For each layer the input and the transformation for neural network can be represented as:
\begin{equation}
\label{eqn:MLP}
\mathbf{h}_{k}= \mathbf{W}_{k} \mathbf{x}_{k-1},  ~~
\mathbf{x}_{k}= \phi(\mathbf{h}_k), ~~~ k=1,..., K,
\end{equation}
where $\mathbf{x}_0 = \mathbf{x}$, $\mathbf{W}_k \in \mathbb{R}^{d_{k} \times d_{k-1}}$ and the learnable parameters $\mathbf{\theta}=\{ \mathbf{W}_k, k=1,...,K \}$. To simplify the notation, we set  $\mathbf{x}_K=\mathbf{h}_K $ as the output of the network $f_{\theta}(\mathbf{x})$. We denote the covariance matrix of the layer input $\Sigma_{\mathbf{x}}=\mathbb{E}_{p(\mathbf{x})}(\mathbf{x} \mathbf{x}^T)$ and the covariance matrix of the layer output-gradient $\Sigma_{\nabla \mathbf{h}} =  \mathbb{E}_{q(\mathbf{y}|\mathbf{x})}( \Dl{\mathbf{h}}^T\Dl{\mathbf{h}})$. Here,  we follow  matrix notation, where all the vectors are column vectors,
except the gradient vectors, which are row vectors.
\begin{proposition}
	\label{th1:norm}
	Given $\Sigma_{\mathbf{x}}$, $\Sigma_{\nabla \mathbf{h}}$ and  $F= \Sigma_{\mathbf{x}} \otimes \Sigma_{\nabla \mathbf{h}}$, we have:
	1) $\lambda_{max}(F)=\lambda_{max}(\Sigma_{\mathbf{x}}) \cdot \lambda_{max}(\Sigma_{\nabla \mathbf{h}}) $; 	
	2) $\kappa(F)=\kappa(\Sigma_{\mathbf{x}}) \cdot \kappa(\Sigma_{\nabla \mathbf{h}}) $.
\end{proposition}


\begin{proof}
	The proof is mainly based on the conclusion from Theorem 4.2.12 in \cite{1991_Matrix}, which is restated as follows:
	\begin{lemma}
		\label{lemma1}
		Let $\mathbf{A} \in \mathbb{R}^{m \times m}$ and $\mathbf{B} \in \mathbb{R}^{n \times n}$. Furthermore, let $\lambda_{a}$ be the arbitrary eigenvalue of $\mathbf{A}$ and  $\lambda_{b}$ be the arbitrary eigenvalue of $\mathbf{B}$. We have $\lambda_{a} \cdot \lambda_{b}$ as an eigenvalue of $\mathbf{A} \otimes \mathbf{B}$. Furthermore, any eigenvalue of  $\mathbf{A} \otimes \mathbf{B}$ arises as a product of the eigenvalues of $\mathbf{A}$ and $\mathbf{B}$.
	\end{lemma}	
	
	Based on the definitions of $\Sigma_{\mathbf{x}}$ and $\Sigma_{\nabla \mathbf{h}}$, we have that $\Sigma_{\mathbf{x}}$ and $\Sigma_{\nabla \mathbf{h}}$ are positive semidefinite. Therefore, all the eigenvalues of $\Sigma_{\mathbf{x}}$/$\Sigma_{\nabla \mathbf{h}}$	are non-negative.  Let $\lambda(\mathbf{A})$ denote the eigenvalue of matrix $\mathbf{A}$.
	Based on Lemma \ref{lemma1}, we have $\lambda(F)=\lambda(\Sigma_{\mathbf{x}})  \lambda(\Sigma_{\nabla \mathbf{h}}) $. Since $\lambda(\Sigma_{\mathbf{x}})$ and  $\lambda(\Sigma_{\nabla \mathbf{h}}) $ are non-negative, we thus have  $\lambda_{max}(F)=\lambda_{max}(\Sigma_{\mathbf{x}}) \cdot \lambda_{max}(\Sigma_{\nabla \mathbf{h}}) $.  Similarly, we can prove that  $\lambda_{min}(F)=\lambda_{min}(\Sigma_{\mathbf{x}}) \cdot \lambda_{min}(\Sigma_{\nabla \mathbf{h}}) $. We thus have $\kappa(F)=\kappa(\Sigma_{\mathbf{x}}) \cdot \kappa(\Sigma_{\nabla \mathbf{h}}) $.	
	
\end{proof}

\begin{theorem}
	\label{th2:norm}
	Given a rectifier neural network (Eqn. \ref{eqn:MLP}) with nonlinearity $\phi(\alpha \mathbf{x})= \alpha \phi(\mathbf{x})$ ($\alpha >0$ ), if the weight in each layer is scaled by $\widehat{\mathbf{W}}_k = \alpha_k \mathbf{W}_k $ ($k=1,...,K$ and $\alpha_k >0$), we have the scaled layer input:
	$\widehat{\mathbf{x}}_k= (\prod\limits_{i=1}^{k} {\alpha_i}) \mathbf{x}_k$.
	Assuming that $\D{\hath{K}} = \mu \D{\h{K}}$, we have the output-gradient:
	$\D{\hath{k}} =  \mu ( \prod\limits_{i=k+1}^{K} {\alpha_i})  \D{\mathbf{h}_{k}}$,  and weight-gradient: $\D{\widehat{\mathbf{W}}_k } = (\mu \prod\limits_{i=1, i\neq k}^K \alpha_i ) \D{\mathbf{W}_k}$, for all $k=1,...,K$.
\end{theorem}


\begin{proof}
	(1) We first demonstrate that the scaled layer input $\widehat{\mathbf{x}}_k= (\prod\limits_{i=1}^{k} {\alpha_i}) \mathbf{x}_k$ ($k=1,...,K$),
	using mathematical induction. It is easy to validate that $\widehat{\mathbf{h}}_1 = \alpha_1 \mathbf{h}_1 $ and $\widehat{\mathbf{x}}_1 = \alpha_1 \mathbf{x}_1 $. We assume that  $\widehat{\mathbf{h}}_t = (\prod\limits_{i=1}^{t} {\alpha_i})  \mathbf{h}_t $ and $\widehat{\mathbf{x}}_t = (\prod\limits_{i=1}^{t} {\alpha_i})  \mathbf{x}_t $ hold, for $t=1,...,k$.
	When $t=k+1$, we have
	\begin{eqnarray}
	\hath{k+1}=\hatW{k+1} \hatx{k+1}=\alpha_{k+1} \W{k+1}  (\prod\limits_{i=1}^{k} {\alpha_i}) \x{k}=(\prod\limits_{i=1}^{k+1} {\alpha_i}) \h{k+1}.
	\end{eqnarray}
	We thus have	
	\begin{eqnarray}
	\hatx{k+1} = \phi(\hath{k+1}) = \phi((\prod\limits_{i=1}^{k+1} {\alpha_i}) \h{k+1})= (\prod\limits_{i=1}^{k+1} {\alpha_i})  \phi(\h{k+1})= (\prod\limits_{i=1}^{k+1} {\alpha_i})  \x{k+1}.
	\end{eqnarray}
	
	By induction, we have $\hatx{k} = (\prod\limits_{i=1}^{k} {\alpha_i}) \x{k}$, for $k=1,...,K$.  We also have $\hath{k} = (\prod\limits_{i=1}^{k} {\alpha_i})  \h{k}$ for $k=1,...,K$.
	
	(2) We then demonstrate that the scaled output-gradient $\D{\hath{k}} = \mu (\prod\limits_{i=k+1}^{K} {\alpha_i}) \D{\h{k}} $ for $k=1,...,K$.
	We also provide this using mathematical induction.
	Based on back-propagation, we have
	\begin{eqnarray}
	\D{\x{k-1}} = \D{\h{k}} \W{k}, ~~~ \D{\h{k-1}} = \D{\x{k-1}} \frac{\partial \x{k-1}}{\partial \h{k-1}},
	\end{eqnarray}
	
	and
	\begin{eqnarray}
	\label{eqn:bequ}
	\frac{\partial \hatx{k-1}}{\partial \hath{k-1}}
	=   \frac{\partial (\prod\limits_{i=1}^{k-1} {\alpha_i}) \x{k-1}}{\partial (\prod\limits_{i=1}^{k-1} {\alpha_i}) \h{k-1} }
	=   \frac{ (\prod\limits_{i=1}^{k-1} {\alpha_i})  \partial  \x{k-1}}{ (\prod\limits_{i=1}^{k-1} {\alpha_i}) \partial \h{k-1}}
	=  \frac{\partial \x{k-1}}{\partial \h{k-1}} , ~~ k=2, ..., K.
	\end{eqnarray}
	
	Based on the assumption that $\D{\hath{K}} = \mu \D{\h{K}}$, we have $\D{\hath{K}} = \mu (\prod\limits_{i=K+1}^{K} {\alpha_i}) \D{\h{K}} $\footnote{We denote $\prod\limits_{i=a}^{b}  {\alpha_i} =1$ if $a>b$.}.
	%     We first calculate that
	%      \begin{eqnarray}
	%      \label{eqn:11}
	%      \D{\hatx{K-1}} = \D{\hath{K}} \hatW{K}
	%          = \mu \D{\h{K}} \alpha_K \W{K}
	%          =\mu \alpha_K \D{\x{K-1}},
	% \end{eqnarray}
	% and
	%    \begin{eqnarray}
	%    \label{eqn:22}
	%  \D{\hath{K-1}}=\D{\hatx{K-1}}. \frac{\partial \hatx{K-1}}{\partial \hath{K-1}}
	%  =\mu \alpha_K \D{\x{K-1}} .  \frac{\partial \x{K-1}}{\partial \h{K-1}} =  \mu \alpha_K \D{\h{K-1}}
	%    \end{eqnarray}
	
	We assume that  $\D{\hath{t}} = \mu (\prod\limits_{i=t+1}^{K} {\alpha_i}) \D{\h{t}} $  holds, for $t=K,...k$.
	When $t=k-1$, we have
	\begin{eqnarray}
	\label{eqn:33}
	\D{\hatx{k-1}} = \D{\hath{k}} \hatW{k}
	= \mu (\prod\limits_{i=k+1}^{K} {\alpha_i})  \D{\h{k}} \alpha_k \W{k}
	=\mu  (\prod\limits_{i=k}^{K} {\alpha_i}) \D{\x{k-1}}.
	\end{eqnarray}
	We also have
	\begin{eqnarray}
	\label{eqn:44}
	\D{\hath{k-1}}=\D{\hatx{k-1}}. \frac{\partial \hatx{k-1}}{\partial \hath{k-1}}
	=\mu  (\prod\limits_{i=k}^{K} {\alpha_i})  \D{\x{k-1}} .  \frac{\partial \x{k-1}}{\partial \h{k-1}} =  \mu  (\prod\limits_{i=k}^{K} {\alpha_i})  \D{\h{k-1}}.
	\end{eqnarray}
	By induction, we thus have  $\D{\hath{k}} = \mu (\prod\limits_{i=k+1}^{K} {\alpha_i}) \D{\h{k}} $, for $k=1,...,K$.
	
	(3) Based on $\D{\W{k}} = \D{\h{k}}^T \x{k-1}^T$, $\widehat{\mathbf{x}}_k= (\prod\limits_{i=1}^{k} {\alpha_i}) \mathbf{x}_k$ and $\D{\hath{k}} = \mu (\prod\limits_{i=k+1}^{K} {\alpha_i}) \D{\h{k}} $, it is easy to prove that $\D{\widehat{\mathbf{W}}_k } = (\mu \prod\limits_{i=1,i\neq k}^K \alpha_i ) \D{\mathbf{W}_k}$ for $k=1,...,K$.
\end{proof}


\begin{theorem}
	\label{th3:norm}
	Under the same condition of Theorem \ref{th2:norm}, for the normalized network with $\h{k}=\W{k} \x{k-1}$ and $\mathbf{s}_k=BN(\mathbf{h}_k)$, we have:
	$\hatx{k}=\mathbf{x}_k$, $\D{\hath{k}} = \frac{1} {\alpha_k} \D{\mathbf{h}_k}$, $\D{\widehat{\mathbf{W}}_k } =\frac{1} {\alpha_k} \D{\mathbf{W}_k}$, for all $k=1,...,K$.
\end{theorem}

\begin{proof}
	(1) Following the proof in Theorem \ref{th2:norm}, by mathematical induction, it is easy to demonstrate that  $\hath{k}= \alpha_k \h{k}$, $\hats{k}=\s{k} $	and $\hatx{k}=\x{k}$, for all $k=1, ...,K$.
	
	(2) We also use mathematical induction to demonstrate $\D{\hath{k}}=\frac{1}{\alpha_k}\D{\h{k}}$ for all $k=1,...,K.$
	
	We first show the formulation of the gradient back-propagating through  each neuron of the BN layer as:
	\begin{eqnarray}
	\label{eq:BNBack}
	\D{h} =\frac{1}{\mathbf{\sigma}} (\D{s} - \mathbb{E}_B(\D{s}) - \mathbb{E}_B(\D{s} s) s),	
	\end{eqnarray}
	where $\sigma $ is the standard deviation and $\mathbb{E}_B$ denotes the expectation over mini-batch examples. We have $\hat{\sigma}_{K} = \alpha_K \sigma_K$ based on $\hath{K}=\alpha_K \h{K} $.
	Since $\hats{K} = \s{K}$, we have $\D{\hats{K}} = \D{\s{K}}$.  Therefore, we have $\D{\hath{K}}= \frac{\sigma_K}{\hat{\sigma}_K} \D{\h{K}} = \frac{1} {\alpha_K} \D{\h{K}}$ from Eqn. \ref{eq:BNBack}.
	
	Assume that  $\D{\hath{t}} = \frac{1}{\alpha_t} \D{\h{t}}$ for $t=K,..., k+1$.  When $t=k$, we have:
	\begin{eqnarray}
	\label{eqn:BN33}
	\D{\hatx{k}} = \D{\hath{k+1}} \hatW{k+1}
	= \frac{1}{\alpha_{k+1}}  \D{\h{k+1}}   \alpha_{k+1} \W{k+1}
	=\D{\x{k}}.
	\end{eqnarray}
	Following the proof for Theorem \ref{th2:norm} , it is easy to get $\D{\hats{k}}=\D{\s{k}}$. Based on $\D{\hats{k}}=\D{\s{k}}$ and $\hats{k}=\s{k}$, we have
	$\D{\hath{k}}= \frac{\sigma_k}{\hat{\sigma}_k} \D{\h{k}} = \frac{1}{\alpha_k} \D{\h{k}}$ from Eqn. \ref{eq:BNBack}.
	
	By induction, we have  $\D{\hath{k}}=\frac{1}{\alpha_k}\D{\h{k}}$, for all $k=1,...,K.$
	
	(3) Based on $\D{\W{k}} = \D{\h{k}}^T \x{k-1}^T$, $\hatx{k}=\x{k}$ and $\D{\hath{k}}=\frac{1}{\alpha_k}\D{\h{k}}$, we have that $\D{\widehat{\mathbf{W}}_k } = \frac{1}{\alpha_{k}} \D{\mathbf{W}_k}$, for all $k=1,...,K.$
	
\end{proof}


\begin{figure}[]
	\centering
	%\vspace{0.2in}
		\subfigure[full FIM]{
		\begin{minipage}[c]{.31\linewidth}
			\centering
			\includegraphics[width=4.0cm]{./figures_sup/MLP-F/Figure1_FIM_all.pdf}
		\end{minipage}
	}
	\subfigure[sub-FIM  (the 1st layer)]{
		\begin{minipage}[c]{.31\linewidth}
			\centering
			\includegraphics[width=4.0cm]{./figures_sup/MLP-F/Figure1_FIM_layer1.pdf}
		\end{minipage}
	}	
	\subfigure[sub-FIM  (the 2nd layer)]{
		\begin{minipage}[c]{.31\linewidth}
			\centering
			\includegraphics[width=4.0cm]{./figures_sup/MLP-F/Figure1_FIM_layer2.pdf}
		\end{minipage}
	}	\\
	\subfigure[sub-FIM  (the 3rd layer)]{
		\begin{minipage}[c]{.31\linewidth}
			\centering
			\includegraphics[width=4.0cm]{./figures_sup/MLP-F/Figure1_FIM_layer3.pdf}
		\end{minipage}
	}
	\subfigure[sub-FIM  (the 4th layer)]{
		\begin{minipage}[c]{.31\linewidth}
			\centering
			\includegraphics[width=4.0cm]{./figures_sup/MLP-F/Figure1_FIM_layer4.pdf}
		\end{minipage}
	}	
	\subfigure[sub-FIM  (the 5th layer)]{
		\begin{minipage}[c]{.31\linewidth}
			\centering
			\includegraphics[width=4.0cm]{./figures_sup/MLP-F/Figure1_FIM_layer5.pdf}
		\end{minipage}
	}\\
	\subfigure[sub-FIM  (the 6th layer)]{
		\begin{minipage}[c]{.31\linewidth}
			\centering
			\includegraphics[width=4.0cm]{./figures_sup/MLP-F/Figure1_FIM_layer6.pdf}
		\end{minipage}
	}
	\subfigure[sub-FIM  (the 7th layer)]{
		\begin{minipage}[c]{.31\linewidth}
			\centering
			\includegraphics[width=4.0cm]{./figures_sup/MLP-F/Figure1_FIM_layer7.pdf}
		\end{minipage}
	}	
	\subfigure[sub-FIM  (the 8th layer)]{
		\begin{minipage}[c]{.31\linewidth}
			\centering
			\includegraphics[width=4.0cm]{./figures_sup/MLP-F/Figure1_FIM_layer8.pdf}
		\end{minipage}
	}
	\caption{Conditioning analysis for unnormalized (`Plain') and normalized (`BN') networks. We show the maximum eigenvalue $\lambda_{max}$ and the generalized condition number $\kappa_{p}$ for comparison between the full FIM $\mathbf{F}$ and sub-FIMs $\{F_k\}$.   The experiments are performed on an 8-layer MLP with 24 neurons in each layer, for MNIST classification. The input image is center-cropped and resized to $12 \times 12$ to remove uninformative pixels. We report the corresponding spectrum at random initialization \cite{1998_NN_Yann}.  }
	%The solid lines corresponds the results of ResNet-NF, while the dashed line marked with 'plus sign' corresponds the results of ResNet. (a) The Training loss with respect to epochs;  (b) The Training error with respect to epochs.
	\label{fig:AP1-FIM}
\end{figure}

\begin{figure}[]
	\centering
	%\vspace{0.2in}
		\subfigure[full $\mathbf{M}$]{
		\begin{minipage}[c]{.31\linewidth}
			\centering
			\includegraphics[width=4.0cm]{./figures_sup/MLP-F/Figure1_AH_all.pdf}
		\end{minipage}
	}
	\subfigure[sub-$\mathbf{M}$  (the 1st layer)]{
		\begin{minipage}[c]{.31\linewidth}
			\centering
			\includegraphics[width=4.0cm]{./figures_sup/MLP-F/Figure1_AH_layer1.pdf}
		\end{minipage}
	}	
	\subfigure[sub-$\mathbf{M}$  (the 2nd layer)]{
		\begin{minipage}[c]{.31\linewidth}
			\centering
			\includegraphics[width=4.0cm]{./figures_sup/MLP-F/Figure1_AH_layer2.pdf}
		\end{minipage}
	}	\\
		\subfigure[sub-$\mathbf{M}$  (the 3rd layer)]{
		\begin{minipage}[c]{.31\linewidth}
			\centering
			\includegraphics[width=4.0cm]{./figures_sup/MLP-F/Figure1_AH_layer3.pdf}
		\end{minipage}
	}
	\subfigure[sub-$\mathbf{M}$  (the 4th layer)]{
		\begin{minipage}[c]{.31\linewidth}
			\centering
			\includegraphics[width=4.0cm]{./figures_sup/MLP-F/Figure1_AH_layer4.pdf}
		\end{minipage}
	}	
	\subfigure[sub-$\mathbf{M}$  (the 5th layer)]{
		\begin{minipage}[c]{.31\linewidth}
			\centering
			\includegraphics[width=4.0cm]{./figures_sup/MLP-F/Figure1_AH_layer5.pdf}
		\end{minipage}
	}\\
		\subfigure[sub-$\mathbf{M}$  (the 6th layer)]{
		\begin{minipage}[c]{.31\linewidth}
			\centering
			\includegraphics[width=4.0cm]{./figures_sup/MLP-F/Figure1_AH_layer6.pdf}
		\end{minipage}
	}
	\subfigure[sub-$\mathbf{M}$  (the 7th layer)]{
		\begin{minipage}[c]{.31\linewidth}
			\centering
			\includegraphics[width=4.0cm]{./figures_sup/MLP-F/Figure1_AH_layer7.pdf}
		\end{minipage}
	}	
	\subfigure[sub-$\mathbf{M}$  (the 8th layer)]{
		\begin{minipage}[c]{.31\linewidth}
			\centering
			\includegraphics[width=4.0cm]{./figures_sup/MLP-F/Figure1_AH_layer8.pdf}
		\end{minipage}
	}
	\caption{Conditioning analysis for unnormalized (`Plain') and normalized (`BN') networks. We show  the maximum eigenvalue $\lambda_{max}$ and the generalized condition number $\kappa_{p}$ for comparison between the full second moment matrix of sample gradient $\mathbf{M}$ and sub-$\{\mathbf{M}_k\}$.   The experiments are performed on an 8-layer MLP with 24 neurons in each layer, for MNIST classification. The input image is center-cropped and resized to $12 \times 12$ to remove uninformative pixels. We report the corresponding spectrum at random initialization \cite{1998_NN_Yann}.  }
	%The solid lines corresponds the results of ResNet-NF, while the dashed line marked with 'plus sign' corresponds the results of ResNet. (a) The Training loss with respect to epochs;  (b) The Training error with respect to epochs.
	\label{fig:AP1-AH}
\end{figure}


\begin{figure}[]
	\centering
	%\vspace{0.2in}
		\subfigure[full FIM]{
		\begin{minipage}[c]{.31\linewidth}
			\centering
			\includegraphics[width=4.0cm]{./figures_sup/0ECCV/AP/ECCV_Figure1_l4_FIM_all.pdf}
		\end{minipage}
	}
	\subfigure[sub-FIM (the 2nd layer)]{
		\begin{minipage}[c]{.31\linewidth}
			\centering
			\includegraphics[width=4.0cm]{./figures_sup/0ECCV/AP/ECCV_Figure1_l4_FIM_layer2.pdf}
		\end{minipage}
	}	
	\subfigure[sub-FIM (the 3rd layer)]{
		\begin{minipage}[c]{.31\linewidth}
			\centering
			\includegraphics[width=4.0cm]{./figures_sup/0ECCV/AP/ECCV_Figure1_l4_FIM_layer3.pdf}
		\end{minipage}
	}	\\
		\subfigure[full $\mathbf{M}$]{
		\begin{minipage}[c]{.31\linewidth}
			\centering
			\includegraphics[width=4.0cm]{./figures_sup/0ECCV/AP/ECCV_Figure1_l4_AH_all.pdf}
		\end{minipage}
	}
	\subfigure[sub-$\mathbf{M}$  (the 2nd layer)]{
		\begin{minipage}[c]{.31\linewidth}
			\centering
			\includegraphics[width=4.0cm]{./figures_sup/0ECCV/AP/ECCV_Figure1_l4_AH_layer2.pdf}
		\end{minipage}
	}	
	\subfigure[sub-$\mathbf{M}$  (the 3rd layer)]{
		\begin{minipage}[c]{.31\linewidth}
			\centering
			\includegraphics[width=4.0cm]{./figures_sup/0ECCV/AP/ECCV_Figure1_l4_AH_layer3.pdf}
		\end{minipage}
	}\\
	\caption{Conditioning analysis for unnormalized (`Plain') and normalized  (`BN') networks.  The experiments are performed on a 4-layer MLP with 24 neurons in each layer, for MNIST classification. The input image is center-cropped and resized to $12 \times 12$ to remove the uninformative pixels. We report the corresponding spectrum at random initialization \cite{1998_NN_Yann}.  }
%	We show the maximum eigenvalue $\lambda_{max}$ and the generalized condition number $\kappa_{p}$ for comparison of the full FIM $\mathbf{F}$ and sub-FIMs $\{F_k\}$. 
	\label{fig:AP1-l4-FIM}
\end{figure}


\begin{figure}[]
	\centering
	%\vspace{0.2in}
		\subfigure[full FIM]{
		\begin{minipage}[c]{.31\linewidth}
			\centering
			\includegraphics[width=4.0cm]{./figures_sup/0ECCV/AP/ECCV_Figure1_h36_l4_FIM_all.pdf}
		\end{minipage}
	}
	\subfigure[sub-FIM (the 2nd layer)]{
		\begin{minipage}[c]{.31\linewidth}
			\centering
			\includegraphics[width=4.0cm]{./figures_sup/0ECCV/AP/ECCV_Figure1_h36_l4_FIM_layer2.pdf}
		\end{minipage}
	}	
	\subfigure[sub-FIM (the 3rd layer)]{
		\begin{minipage}[c]{.31\linewidth}
			\centering
			\includegraphics[width=4.0cm]{./figures_sup/0ECCV/AP/ECCV_Figure1_h36_l4_FIM_layer3.pdf}
		\end{minipage}
	}	\\
	\subfigure[full $\mathbf{M}$ ]{
		\begin{minipage}[c]{.31\linewidth}
			\centering
			\includegraphics[width=4.0cm]{./figures_sup/0ECCV/AP/ECCV_Figure1_h36_l4_AH_all.pdf}
		\end{minipage}
	}
	\subfigure[sub-$\mathbf{M}$  (the 2nd layer)]{
		\begin{minipage}[c]{.31\linewidth}
			\centering
			\includegraphics[width=4.0cm]{./figures_sup/0ECCV/AP/ECCV_Figure1_h36_l4_AH_layer2.pdf}
		\end{minipage}
	}	
	\subfigure[sub-$\mathbf{M}$ (the 3rd layer)]{
		\begin{minipage}[c]{.31\linewidth}
			\centering
			\includegraphics[width=4.0cm]{./figures_sup/0ECCV/AP/ECCV_Figure1_h36_l4_AH_layer3.pdf}
		\end{minipage}
	}\\
	\caption{Conditioning analysis for unnormalized (`Plain') and normalized (`BN') networks.   The experiments are performed on a 4-layer MLP with 36 neurons in each layer, for MNIST classification. The input image is center-cropped and resized to $12 \times 12$ to remove the uninformative pixels. We report the corresponding spectrum at random initialization \cite{1998_NN_Yann}.  }
	% We show the maximum eigenvalue $\lambda_{max}$ and the generalized condition number $\kappa_{p}$ for comparison of the full FIM $\mathbf{F}$ and sub-FIMs $\{F_k\}$.
	\label{fig:AP1-l4-h36-FIM}
\end{figure}

\section{Comparison Between the Analyses with Full Curvature and Sub-curvature Matrices}
In Section 3 of the  paper, we conduct experiments to analyze the training dynamics of  the unnormalized (`Plain') and batch normalized \cite{2015_ICML_Ioffe} (`BN') networks, on an 8-layer MLP, by analyzing the spectrum of the full Fisher Information Matrix (FIM)  and  sub-FIMs. We only report the sub-FIMs with respect to the 3rd and 6th layer, due to the page limit. Here, we 
show the corresponding results for all sum-FIMs in Figure \ref{fig:AP1-FIM}. 


We also conduct experiments to analyze `Plain' and `BN', using the second moment matrix of sample gradient $\mathbf{M}$. The results are shown in   Figure \ref{fig:AP1-AH}. We have the same observation as when using the full FIM. 
\revise{It is interesting to use sub-Hessian for the conditioning analysis, since Hessian provides a good characterization of the landscapes~\cite{2018_NIPS_Li}. 
We believe that the max eigenvalue of sub-Hessian can also indicate the magnitude of the weight-gradient in each layer, like the sub-FIM/sub-M. However, the general condition number shown in this paper is not well defined for sub-Hessian, since it has negative eigenvalues.
}

We further conduct experiments on a 4-layer MLP with 24 neurons in each layer, and a 4-layer MLP with 36 neurons in each layer. The corresponding results with different curvature matrices are shown in Figures~\ref{fig:AP1-l4-FIM} and~\ref{fig:AP1-l4-h36-FIM}, respectively. 

\subsubsection{Complexity Analysis}	
\revise{
Here, we provide the complexity analysis. For simplifying  notation, we consider a $L$ layer MLP with $d$ neurons in each layer. The example number is $N$.  For full conditioning analysis,  the cost  includes computing the curvature matrix  ($O(N(Ld^2)^2) $) and the eigen-decomposition ($ O((Ld^2)^3)$). 
The computation cost is reduced to $O(NL(d^2)^2)+ O(L (d^2)^3)$ for layer-wise conditioning analysis, and further reduced to  $O(NL d^2) + O(Ld^3)$ using our efficient approximation. Note that we only consider naive implementation without any tricks in acceleration (e.g., using implicitly restarted Lanczos method~\cite{2018_NIPS_Li}).	
	}

\begin{figure*}[h]
	\centering
	\hspace{-0.2in}		\subfigure[ $\lambda_{max}(\Sigma_x)$]{
		\begin{minipage}[c]{.32\linewidth}
			\centering
			\includegraphics[width=4.0cm]{./figures_sup/0ECCV/MLP_SGD/ECCV_RandInit_ME_input.pdf}
		\end{minipage}
	}
	\subfigure[$\lambda_{max}(\Sigma_{\nabla \mathbf{h}})$]{
		\begin{minipage}[c]{.32\linewidth}
			\centering
			\includegraphics[width=4.0cm]{./figures_sup/0ECCV/MLP_SGD/ECCV_RandInit_ME_gradOutput.pdf}
		\end{minipage}
	}
	\subfigure[Training loss]{
		\begin{minipage}[c]{.32\linewidth}
			\centering
			\includegraphics[width=4.0cm]{./figures_sup/b1024/Figure1_b1024_RandInit_loss.pdf}
		\end{minipage}
	}
	\\
	\vspace{-0.12in}
	
	\hspace{-0.2in}		\subfigure[ $\lambda_{max}(\Sigma_x)$]{
		\begin{minipage}[c]{.32\linewidth}
			\centering
			\includegraphics[width=4.0cm]{./figures_sup/0ECCV/MLP_SGD/ECCV_HeInit_ME_input.pdf}
		\end{minipage}
	}
	\subfigure[$\lambda_{max}(\Sigma_{\nabla \mathbf{h}})$]{
		\begin{minipage}[c]{.32\linewidth}
			\centering
			\includegraphics[width=4.0cm]{./figures_sup/0ECCV/MLP_SGD/ECCV_HeInit_ME_gradOutput.pdf}
		\end{minipage}
	}
	\subfigure[Training loss]{
		\begin{minipage}[c]{.32\linewidth}
			\centering
			\includegraphics[width=4.0cm]{./figures_sup/b1024/Figure1_b1024_HeInit_loss.pdf}
		\end{minipage}
	}	
\vspace{-0.15in}
	\caption{Analysis of the magnitude of the layer input (indicated by $\lambda_{max}(\Sigma_x)$) and layer output-gradient (indicated by $\lambda_{max}(\Sigma_{\nabla \mathbf{h}})$ ). We use the SGD with a batch size of 1024 to train the 20-layer MLP for classification. The results of (a)(b)(c) are under random initialization \cite{1998_NN_Yann}, while (d)(e)(f)  use He-initialization \cite{2015_ICCV_He}.  }
	\label{fig:stablizeBN}
	\vspace{-0.16in}
\end{figure*}


\begin{figure*}[]
	\centering
	\hspace{-0.2in}		\subfigure[$\kappa_{80\%}(\Sigma_x)$]{
		\begin{minipage}[c]{.22\linewidth}
			\centering
			\includegraphics[width=3.0cm]{./figures_sup/0ECCV/MLP_SGD/ECCV_plot_sup_b1024_c_k80_HeInit_input.pdf}
		\end{minipage}
	}
	\hspace{0.03in}	\subfigure[$\kappa_{80\%}(\Sigma_{\nabla \mathbf{h}})$]{
		\begin{minipage}[c]{.22\linewidth}
			\centering
			\includegraphics[width=3.0cm]{./figures_sup/0ECCV/MLP_SGD/ECCV_plot_sup_b1024_c_k80_HeInit_gradOutput.pdf}
		\end{minipage}
	}
	\hspace{0.03in}	\subfigure[$\kappa_{100\%}(\Sigma_x)$]{
		\begin{minipage}[c]{.22\linewidth}
			\centering
			\includegraphics[width=3.0cm]{./figures_sup/0ECCV/MLP_SGD/ECCV_plot_sup_b1024_c_k_HeInit_input.pdf}
		\end{minipage}
	}
	\hspace{0.03in}	\subfigure[$\kappa_{100\%}(\Sigma_{\nabla \mathbf{h}})$]{
		\begin{minipage}[c]{.22\linewidth}
			\centering
			\includegraphics[width=3.0cm]{./figures_sup/0ECCV/MLP_SGD/ECCV_plot_sup_b1024_c_k_HeInit_gradOutput.pdf}
		\end{minipage}
	}
	\vspace{-0.14in}
	\caption{Analysis on the condition number of the layer input (indicated by $\kappa_{p}(\Sigma_x)$) and layer output-gradient (indicated by $\kappa_{p}(\Sigma_{\nabla \mathbf{h}})$ ). The experimental setups are the same as in Figure \ref{fig:stablizeBN}.}
	\label{fig:conditionNumber}
	\vspace{-0.22in}
\end{figure*}


%\subsection{Different Batch Size in Approximation}

\section{More Experiments in Exploring Batch Normalized Networks}
In this section, we provide more experimental results relating to the exploration of batch normalization (BN) \cite{2015_ICML_Ioffe} by layer-wise conditioning analysis, which is discussed in Section 4 of the  paper. We include  experiments that train neural networks with Stochastic Gradient Descent (SGD),  experiments relating to weight domination and experiments relating to dying/full neurons, as discussed in the  paper.
\subsection{Experiments with SGD}
\label{Sec-CNN}
Here, we perform  experiments  on the Multiple Layer Perceptron (MLP) for MNIST classification and Convolutional Neural Networks (CNNs) for CIFAR-10 and \revise{ImageNet~\cite{2009_ImageNet}} classification.


\begin{figure*}[]
	\centering
	\hspace{-0.2in}		\subfigure[ $\lambda_{max}(\Sigma_x)$]{
		\begin{minipage}[c]{.32\linewidth}
			\centering
			\includegraphics[width=4.0cm]{./figures_sup/0ECCV/MLP_Adam/ECCV_sup_adam_ME_RandInit_input.pdf}
		\end{minipage}
	}
	\subfigure[$\lambda_{max}(\Sigma_{\nabla \mathbf{h}})$]{
		\begin{minipage}[c]{.32\linewidth}
			\centering
			\includegraphics[width=4.0cm]{./figures_sup/0ECCV/MLP_Adam/ECCV_sup_adam_ME_RandInit_gradOutput.pdf}
		\end{minipage}
	}
	\subfigure[Training loss]{
		\begin{minipage}[c]{.32\linewidth}
			\centering
			\includegraphics[width=4.0cm]{./figures_sup/0ECCV/MLP_Adam/ECCV_sup_adam_b1024_RandInit_loss.pdf}
		\end{minipage}
	}
	\\	
	\hspace{-0.2in}		\subfigure[ $\kappa_{80\%}(\Sigma_x)$]{
		\begin{minipage}[c]{.46\linewidth}
			\centering
			\includegraphics[width=5.0cm]{./figures_sup/0ECCV/MLP_Adam/ECCV_sup_adam_c80_RandInit_input.pdf}
		\end{minipage}
	}
	\subfigure[$\kappa_{80\%}(\Sigma_{\nabla \mathbf{h}})$]{
		\begin{minipage}[c]{.46\linewidth}
			\centering
			\includegraphics[width=5.0cm]{./figures_sup/0ECCV/MLP_Adam/ECCV_sup_adam_c80_RandInit_gradOutput.pdf}
		\end{minipage}
	}	
\vspace{-0.15in}
	\caption{Layer-wise conditioning analysis results with Adam optimizer~\cite{2014_CoRR_Kingma}.  We use a batch size of 1024 to train the 20-layer MLP for classification. Figures (a) and (b) show the magnitude of the layer input  and layer output-gradient, respectively. Figure (c) shows the training loss with respect to the epochs. Figures (d) and (e) show the condition number of the layer input  and layer output-gradient, respectively.  }
	\label{fig:BNAdam}
	\vspace{-0.16in}
\end{figure*}

	\vspace{-0.2in}
\subsubsection{MLP for MNIST Classification}
Here, we use the same experimental setup as the experiments described in the  paper for MNIST classification, except that we use SGD with a batch size of 1024. The results are shown in Figures \ref{fig:stablizeBN} and \ref{fig:conditionNumber}. We obtain similar results as those obtained using full gradient descent, as described in Section 4 of the  paper.

We also conduct experiments using the Adam optimizer~\cite{2014_CoRR_Kingma}.  We again use a batch size of 1024 to train the 20-layer MLP for classification.  We report the best training loss among the learning rates in $\{0.001, 0.0005, 0.0001 \}$. The results under random initialization \cite{1998_NN_Yann} are shown in Figure~\ref{fig:BNAdam}. We observe that: 1) `Plain' with the Adam optimizer can well adjust the magnitude of the layer input (Figure~\ref{fig:BNAdam} (a)) and layer output-gradient (Figure~\ref{fig:BNAdam} (b)) during training, compared to `Plain' with the naive SGD
 optimizer (Figure ~\ref{fig:stablizeBN} (a) and (b)); 2) `BN' can better stabilize the training; 3) `BN' has better conditioning than `Plain' during training. 
%\subsubsection{MLP for MNIST Classification with Adam optimization}
%\TODO{adam optimization results}


\begin{figure*}[]
	\centering
	\hspace{-0.15in}	\subfigure[$\kappa_{100\%}(\Sigma_x)$]{
		\begin{minipage}[c]{.3\linewidth}
			\centering
			\includegraphics[width=4.0cm]{./figures_sup/0ECCV/ECCV_P0_c_input.pdf}
		\end{minipage}
	}
	\hspace{0.05in}	\subfigure[$\kappa_{100\%}(\Sigma_{\nabla \mathbf{h}})$]{
		\begin{minipage}[c]{.3\linewidth}
			\centering
			\includegraphics[width=4.0cm]{./figures_sup/0ECCV/ECCV_P0_c_gradOutput.pdf}
		\end{minipage}
	}
	\hspace{0.05in}	\subfigure[Training loss]{
		\begin{minipage}[c]{.3\linewidth}
			\centering
			\includegraphics[width=4.0cm]{./figures_sup/Conv/P0_loss_layer20.pdf}
		\end{minipage}
	}
		\vspace{-0.15in}
	\caption{Layer-wise conditioning analysis on the VGG-style network for CIFAR-10 classification. 
		Figures (a) and (b) show the condition number of the layer input (indicated by $\kappa_{p}(\Sigma_x)$) and layer output-gradient (indicated by $\kappa_{p}(\Sigma_{\nabla \mathbf{h}})$ ), respectively. Figure (c) shows the training loss with respect to the epochs. }
	\label{fig:P0}
		\vspace{-0.2in}
\end{figure*}


\begin{figure*}[]
	\centering
	\hspace{-0.15in}	\subfigure[$\kappa_{100\%}(\Sigma_x)$]{
		\begin{minipage}[c]{.3\linewidth}
			\centering
			\includegraphics[width=4.0cm]{./figures_sup/0ECCV/ECCV_res_c_input.pdf}
		\end{minipage}
	}
	\hspace{0.05in}	\subfigure[$\kappa_{100\%}(\Sigma_{\nabla \mathbf{h}})$]{
		\begin{minipage}[c]{.3\linewidth}
			\centering
			\includegraphics[width=4.0cm]{./figures_sup/0ECCV/ECCV_res_c_gradOutput.pdf}
		\end{minipage}
	}
	\hspace{0.05in}	\subfigure[Training loss]{
		\begin{minipage}[c]{.3\linewidth}
			\centering
			\includegraphics[width=4.0cm]{./figures_sup/Conv/res_loss_layer20.pdf}
		\end{minipage}
	}
	\vspace{-0.15in}
	\caption{Layer-wise conditioning analysis on the residual network \cite{2015_CVPR_He} for CIFAR-10 classification.  Figures	(a) and (b) show the condition number of the layer input (indicated by $\kappa_{p}(\Sigma_x)$) and layer output-gradient (indicated by $\kappa_{p}(\Sigma_{\nabla \mathbf{h}})$ ), respectively. Figure (c) shows the training loss with respect to the epochs. }
	\label{fig:Res}
		\vspace{-0.2in}
\end{figure*}

	\vspace{-0.2in}
\subsubsection{CNN for CIFAR-10 Classification}
We perform a layer-wise conditioning analysis on the VGG-style and residual network \cite{2015_CVPR_He} architectures.
Note that we view the activation in each spatial location of the feature map as an independent example,  when calculating the covariance matrix of the convolutional layer input and output-gradient. This process is similar to the process proposed in BN to normalize the convolutional layer \cite{2015_ICML_Ioffe}.

We use the 20-layer residual network  described in the paper \cite{2015_CVPR_He} for CIFAR-10 classification. The VGG-style network is constructed based on the 20-layer residual network, removing the residual connections.

We use the same setups as described in \cite{2015_CVPR_He}, except that we do not use  weight decay in order to simplify the analysis and run the experiments on one GPU.
Since the unnormalized networks (including the VGG-style and residual network)  do not converge with the large learning rate of 0.1, we  run additional experiments with a learning rate of 0.01, and report these results.


Figures \ref{fig:P0} and Figure \ref{fig:Res} show the results for the VGG-Style and residual network, respectively. We obtain the same observations as those made for the MLP for MNIST classification.
	\begin{figure*}[]
		\centering
		\hspace{-0.15in}	\subfigure[$\kappa_{100\%}(\Sigma_x)$]{
			\begin{minipage}[c]{.3\linewidth}
				\centering
				\includegraphics[width=4.0cm]{./figures_sup/imageNet/c_input.pdf}
			\end{minipage}
		}
		\hspace{0.05in}	\subfigure[$\kappa_{100\%}(\Sigma_{\nabla \mathbf{h}})$]{
			\begin{minipage}[c]{.3\linewidth}
				\centering
				\includegraphics[width=4.0cm]{./figures_sup/imageNet/c_go.pdf}
			\end{minipage}
		}
		\hspace{0.05in}	\subfigure[Training loss]{
			\begin{minipage}[c]{.3\linewidth}
				\centering
				\includegraphics[width=4.0cm]{./figures_sup/imageNet/loss.pdf}
			\end{minipage}
		}
		\vspace{-0.15in}
		\caption{Layer-wise conditioning analysis on the residual network \cite{2015_CVPR_He} for ImageNet classification.  Figures	(a) and (b) show the condition number of the layer input (indicated by $\kappa_{p}(\Sigma_x)$) and layer output-gradient (indicated by $\kappa_{p}(\Sigma_{\nabla \mathbf{h}})$ ), respectively. Figure (c) shows the training loss with respect to the training iterations. }
		\label{fig:Res-ImageNet-condition}
	%	\vspace{-0.2in}
	\end{figure*}
\revise{	
\subsubsection{CNN for ImageNet Classification}
We also perform a layer-wise conditioning analysis on ImageNet using a 18-layer residual network \cite{2015_CVPR_He}.
We use the same setups as described in \cite{2015_CVPR_He}, except that we run the experiments on one GPU.
%Since the unnormalized networks (including the VGG-style and residual network)  do not converge with the large learning rate of 0.1, we  run additional experiments with a learning rate of 0.01, and report these results.
Figure \ref{fig:Res-ImageNet-condition} show the results. We also obtain the same observations as those made for the MLP for MNIST classification.
}

\subsection{Experiments Relating to Weight Domination}
\begin{figure}[]
	\centering
	%\vspace{0.2in}
	\hspace{-0.3in}\subfigure[100-layer MLP]{
		\begin{minipage}[c]{.4\linewidth}
			\centering
			\includegraphics[width=5.0cm]{./figures_sup/explosion/MLP_100.pdf}
		\end{minipage}
	}
	\hspace{0.2in}	\subfigure[110-layer VGG-style CNN]{
		\begin{minipage}[c]{.4\linewidth}
			\centering
			\includegraphics[width=5.0cm]{./figures_sup/explosion/CNN_110.pdf}
		\end{minipage}
	}	
	\vspace{-0.15in}
	\caption{Experiments relating to gradient explosion of BN in deep networks without residual connections. We show the results of (a) a 100-layer MLP for MNIST classification and (b) a 110-layer VGG-style CNN for CIFAR-10 classification. }
	%The solid lines corresponds the results of ResNet-NF, while the dashed line marked with 'plus sign' corresponds the results of ResNet. (a) The Training loss with respect to epochs;  (b) The Training error with respect to epochs.
	\label{fig:Explosion}
	\vspace{-0.15in}
\end{figure}


\begin{figure}[]
	\centering
	%\vspace{0.2in}
	\subfigure[Training loss]{
		\begin{minipage}[c]{.3\linewidth}
			\centering
			\includegraphics[width=4.0cm]{./figures_sup/control_CNN/Figure_BN_NS_00001_loss.pdf}
		\end{minipage}
	}
	\subfigure[Training error]{
		\begin{minipage}[c]{.3\linewidth}
			\centering
			\includegraphics[width=4.0cm]{./figures_sup/control_CNN/Figure_BN_NS_00001_train.pdf}
		\end{minipage}
	}	
	\subfigure[Test error]{
		\begin{minipage}[c]{.3\linewidth}
			\centering
			\includegraphics[width=4.0cm]{./figures_sup/control_CNN/Figure_BN_NS_00001_test.pdf}
		\end{minipage}
	}	
	\vspace{-0.15in}
	\caption{Exploring the effectiveness of  weight domination on a 16-layer VGG network with BN for CIFAR-10 classification.  We simulate  weight domination
		in a specific layer by blocking its weight updates. We denote
		`0' in the legend as the state of weight dominant (the first digit represents the first three consecutive convolutional layers). }
	\vspace{-0.15in}
	\label{fig:Control-CNN}
\end{figure}

\subsubsection{Gradient Explosion of BN}
In Section 4.1 of the  paper, we mention that, even for the network with BN, there is still the possibility that the  magnitude of the weight in certain layers is significantly increased.
Here, we provide the experimental results.

We conduct experiments on a 100-layer batch normalized MLP with 256 neurons in each layer for MNIST classification. We calculate the maximum eigenvalues of the sub-FIMs, and provide the results for the first seven iterations in Figure~\ref{fig:Explosion} (a). We observe that the weight-gradient has exponential
explosion at initialization (`Iter0'). After a single step, the first-step gradients dominate the
weights due to gradient explosion in lower layers, hence the exponential growth in the magnitude of the weight. This increased magnitude of weight leads to small weight gradients (`Iter1' to `Iter7'), which is caused by BN, as discussed in the  paper. Therefore, some layers (especially the lower layers) of the network enter the state of \emph{weight domination}.   We obtain similar observations on the 110-layer VGG-style network for CIFAR-10 classification, as shown in Figure ~\ref{fig:Explosion} (b).

\subsubsection{Investigation of Weight Domination} Weight domination sometimes harms the learning of the network, because this state limits the representational ability  of the corresponding layer.  We conducted experiments on a five-layer MLP and provided the results in the  paper.
Here, we also conduct experiments on CNNs for CIFAR-10 datasets, shown in Figure ~\ref{fig:Control-CNN}.
We observe that the network with certain layers being in states of \textit{weight domination} can still decrease the loss, but with degenerated performance.


\subsection{Experiments Relating to  Dying Neurons}

In Section 4.2 of the  paper,  we mentioned that  `Plain' has dying/full neurons, and the number of dying/full neurons increases as the layer number increases. Figure~\ref{fig:dyingNode} shows the details of this phenomenon. 


\begin{figure}[]
	\centering
	%\vspace{-0.1in}
	\begin{minipage}[c]{.96\linewidth}
		\centering
		\includegraphics[width=8.0cm]{./figures/4BNvsLN/DyingNode.pdf}
	\end{minipage}
	\vspace{-0.14in}
	\caption{Dying and full neurons during training. The experiments are performed on a 20-layer MLP with 256 neurons in each layer, for MNIST classification. We show the results corresponding to the He-initialization \cite{2015_ICCV_He}.}
	\label{fig:dyingNode}
	\vspace{-0.2in}
\end{figure}


\begin{figure}[]
	\centering
	%\vspace{0.2in}
	\subfigure[18-layer]{
		\begin{minipage}[c]{.40\linewidth}
			\centering
			\includegraphics[width=5.0cm]{./figures_sup/DeepResidual/ImageNet_d18.pdf}
		\end{minipage}
	}
	\subfigure[50-layer]{
		\begin{minipage}[c]{.40\linewidth}
			\centering
			\includegraphics[width=5.0cm]{./figures_sup/DeepResidual/ImageNet_d50.pdf}
		\end{minipage}
	}	
	\vspace{-0.2in}
	\caption{Comparison of top-1 training errors (solid lines) and test errors (dashed lines) of  ResNet and  ResNet$_{LastBN}$ on ImageNet. }
	%The solid lines corresponds the results of ResNet-NF, while the dashed line marked with 'plus sign' corresponds the results of ResNet. (a) The Training loss with respect to epochs;  (b) The Training error with respect to epochs.
	\label{fig:ImageNet}
\end{figure}

\begin{figure*}[t]
	\centering
	\hspace{-0.2in}		\subfigure[Training loss]{
		\begin{minipage}[c]{.22\linewidth}
			\centering
			\includegraphics[width=3.0cm]{./figures/0ECCV/compare_preres_d1202_loss.pdf}
		\end{minipage}
	}
	\hspace{0.03in}	\subfigure[$\lambda_{\Sigma_{\mathbf{x}}}$]{
		\begin{minipage}[c]{.22\linewidth}
			\centering
			\includegraphics[width=3.0cm]{./figures/0ECCV/compare_preres_d1202_input.pdf}
		\end{minipage}
	}
	\hspace{0.03in}	\subfigure[$\lambda_{\Sigma_{\D{\W{}}}}$]{
		\begin{minipage}[c]{.22\linewidth}
			\centering
			\includegraphics[width=3.0cm]{./figures/0ECCV/compare_preres_d1202_gWeight.pdf}
		\end{minipage}
	}
	\hspace{0.03in}	\subfigure[$\|\mathbf{W} \|_2$]{
		\begin{minipage}[c]{.22\linewidth}
			\centering
			\includegraphics[width=3.0cm]{./figures/0ECCV/compare_preres_d1202_W.pdf}
		\end{minipage}
	}
	\vspace{-0.2in}
	\caption{Conditioning analysis on the last linear layer of 1202-layer `ResNet', `PreResNet' and `PreResNet$_{v1}$' for CIFAR-10 classification. }
	\label{fig:problem-PreResNet}
	%	\vspace{-0.2in}
\end{figure*}
\section{More  Results for Deep Residual Network}
%\subsection{CIFAR Datasets}
%%Here, we show more experiments on CIFAR datasets.
%\paragraph{CIFAR-10}
%Figure \ref{fig:C10} compares the training and test errors  of ResNet and ResNet$_{LastBN}$. We observe that the advantage  of ResNet$_{LastBN}$  over ResNet in training is significantly amplified as the depth increases.
%
%\paragraph{CIFAR-100}
%Figure \ref{fig:C100} compares the training and test errors  of ResNet and ResNet$_{LastBN}$. Similar to our observation on CIFAR-10, we find that the advantage  of ResNet$_{LastBN}$  over ResNet in training is significantly amplified as the depth increases.
%
%
%
%\begin{figure*}[t]
%	\centering
%	\hspace{-0.2in}	\subfigure[56-layer]{
%		\begin{minipage}[c]{.22\linewidth}
%			\centering
%			\includegraphics[width=3.0cm]{./figures_sup/DeepResidual/C10_d56.pdf}
%		\end{minipage}
%	}
%	\hspace{0.03in}	\subfigure[110-layer]{
%		\begin{minipage}[c]{.22\linewidth}
%			\centering
%			\includegraphics[width=3.0cm]{./figures_sup/DeepResidual/C10_d110.pdf}
%		\end{minipage}
%	}
%	\vspace{-0.15in}
%	\hspace{0.03in}	\subfigure[230-layer]{
%		\begin{minipage}[c]{.22\linewidth}
%			\centering
%			\includegraphics[width=3.0cm]{./figures_sup/DeepResidual/C10_d230.pdf}
%		\end{minipage}
%	}
%	\hspace{0.03in}	\subfigure[1202-layer]{
%		\begin{minipage}[c]{.22\linewidth}
%			\centering
%			\includegraphics[width=3.0cm]{./figures_sup/DeepResidual/C10_d1202.pdf}
%		\end{minipage}
%	}
%	\vspace{0.2in}
%	\caption{Comparison of training errors (solid lines) and test errors (dashed lines) of  ResNet and  ResNet$_{LastBN}$ on CIFAR-10. }
%	\label{fig:C10}
%\end{figure*}
%
%
%
%
%\begin{figure*}[t]
%	\centering
%	\hspace{-0.2in}	\subfigure[56-layer]{
%		\begin{minipage}[c]{.22\linewidth}
%			\centering
%			\includegraphics[width=3.0cm]{./figures_sup/DeepResidual/C100_d56.pdf}
%		\end{minipage}
%	}
%	\hspace{0.03in}	\subfigure[110-layer]{
%		\begin{minipage}[c]{.22\linewidth}
%			\centering
%			\includegraphics[width=3.0cm]{./figures_sup/DeepResidual/C100_d110.pdf}
%		\end{minipage}
%	}
%	\vspace{-0.15in}
%	\hspace{0.03in}	\subfigure[230-layer]{
%		\begin{minipage}[c]{.22\linewidth}
%			\centering
%			\includegraphics[width=3.0cm]{./figures_sup/DeepResidual/C100_d230.pdf}
%		\end{minipage}
%	}
%	\hspace{0.03in}	\subfigure[1202-layer]{
%		\begin{minipage}[c]{.22\linewidth}
%			\centering
%			\includegraphics[width=3.0cm]{./figures_sup/DeepResidual/C100_d1202.pdf}
%		\end{minipage}
%	}
%		\vspace{0.2in}
%	\caption{Comparison of training errors (solid lines) and test errors (dashed lines) of  ResNet and  ResNet$_{LastBN}$ on CIFAR-100. }
%	\label{fig:C100}
%\end{figure*}
%
%


\subsection{Results on ImageNet classification}
As mentioned in Section 5.1 of the  paper, we validate the effectiveness of ResNet$_{LastBN}$ on the large-scale ImageNet classification, with 1000 classes \cite{2009_ImageNet}. Here, we provide the details.

 We use the official 1.28M training images as the training set, and evaluate the top-1 classification errors on the validation set with 50k images. We perform the experiments using the 18-layer and 50-layer networks. We follow the same setup as described in \cite{2015_CVPR_He}, except that 1) we train over 100 epochs with an extra lowered learning rate at the 90th epoch; 2) we use one GPU for the 18-layer network and four GPUs for 50-layer network.


Figures \ref{fig:ImageNet} (a) and (b) show  the training results for the 18-layer and 50-layer residual networks, respectively.
We find ResNet$_{LastBN}$ has a better optimization efficiency than ResNet, at both depths. Table \ref{Table:ImageNet} shows the validation errors. ResNet$_{LastBN}$ has a slightly improved  performance, under the standard hyper-parameters configuration.  Due to the improved optimization efficiency of ResNet$_{LastBN}$,
the advantage can be further amplified if we add the magnitude of the regularization, \eg, when we  use a weight decay (WD) of 0.0002 or add a dropout (DR) of 0.3, ResNet$_{LastBN}$ achieves better performance.


\begin{table}[]
	\caption{Comparison of top-1 validation errors ($\%$, single model and
		single-crop) on the 18- and 50-layer residual networks
		for ImageNet classification.}
	%blog, while the ResNet-101 result was reported in \cite{2016_CoRR_He}.}
	\label{Table:ImageNet}
	\centering
	\begin{small}
	\begin{tabular}{p{0.8in} |p{0.61in}<{\centering} p{0.63in}<{\centering} p{0.61in}<{\centering}|p{0.61in}<{\centering} p{0.63in}<{\centering} p{0.61in}<{\centering}}
	%	\begin{tabular}{c|ccc|ccc}
		\toprule
		& \multicolumn{3}{c|}{depth-18} &    \multicolumn{3}{c}{depth-50}   \\
		Method   & standard    & WD=0.0002  & DR=0.3   &  standard    & WD=0.0002  & DR=0.3   \\
		\hline
		%ResNet* \cite{2015_CVPR_He}  & 30.43 &  --&-- & 24.70 & --&-- \\
		ResNet    & 29.78 &  30.07   & 30.62 & 23.97 & 24.37 & 23.81  \\
		ResNet$_{LastBN}$  & \textbf{29.38} & \textbf{28.96} & \textbf{29.32} & \textbf{ 23.76}  & \textbf{23.49}  & \textbf{23.47}\\
		\toprule
	\end{tabular}
	\end{small}
	\vspace{-0.12in}
\end{table}


\begin{table*}[t]
	\caption{Experiments of putting a BN layer before the last linear layer  on the VGG-style networks (without BN) and ResNets (without BN) for CIFAR-10 classification. We report the test error ($\%$).}
	%\vspace{0.14in}
	\label{Tabe:Sup-C10}
	\centering
	\begin{tabular}{p{1in} p{0.8in}<{\centering}  p{0.8in}<{\centering}  p{0.8in}<{\centering} p{0.8in}<{\centering} p{1in}<{\centering}}
		\toprule
		% \multicolumn{2}{c}{Part}                   \\
		%\cmidrule(r){1-2}
		method     & depth-20     & depth-44  & depth-56 & depth-110 \\
		\midrule
		VGG     &  14.88 $\pm$  0.47  & 33.90 $\pm$  7.1 & 89.93 $\pm$  0.12 & 90 $\pm$ 0  \\
		VGG$_{LastBN}$    &  \textbf{12.89 $\pm$  0.20}  & \textbf{18.40 $\pm$ 0.90 } & \textbf{23.40 $\pm$  1.74} & \textbf{73.99 $\pm$ 16}  \\
		\midrule
		ResNet  &  11.21 $\pm$ 0.14  & 9.90 $\pm$ 0.31 & 9.48 $\pm$ 0.07 & 8.93 $\pm$ 0.22  \\
		ResNet$_{LastBN}$  &  \textbf{10.31 $\pm$ 0.25} &  \textbf{8.99 $\pm$ 0.25} & \textbf{8.61 $\pm$ 0.05}&  \textbf{8.37 $\pm$ 0.07}  \\
		% Improvement  &  + 1.02 &  +0.79 & +1.41&  +3.74  \\
		\toprule[1pt]
	\end{tabular}
	\vspace{-0.14in}
\end{table*}

\subsection{Conditioning Analysis on PreResNet}
\revise{
As mentioned in Section 5.2 of the  paper, we investigate which component in PreResNet~\cite{2016_CoRR_He} (\eg, the  pre-activation or the extra BN layer)  benefits the optimization behaviors, using our conditioning analysis. Here, we provide the details. 
We use the exact same setups as the previous experiments on ResNet. 
Figure~\ref{fig:problem-PreResNet} shows the results of conditioning analysis on the last linear layer of the 1202-layer network. 
}


\subsection{More Results of Putting a BN Layer before the Last Linear Layer}
\revise{
We also observe that the method of putting a BN layer before the last linear layer is useful in other architectures, in which the last linear layer’s input $\x{}$ has significantly varying magnitude (indicated by $\lambda_{\Sigma_{\x{}}}$) during training (\eg, the ResNets case).
We conduct experiments on the VGG-style networks (without BN) and ResNets (without BN) for CIFAR-10 classification. The setup is the same as in Section~\ref{Sec-CNN}.   We vary the depth ranging in 20, 44, 56, 110. We observe that for all depths, putting a BN layer before the last linear layer improves the performance .   
}


%\revise{
%It is well known that normalizing the input benefits the optimization for linear models (Section 2 of the paper), and we can view the last linear layer and the loss function as a linear model, if we fix the distribution of $\x{}$ (fixing other parameters, like a feature extractor). From this view, the method is usually useful. We also analyze the learning dynamic where the distribution of $\x{}$ can be adjusted by back-propagation, as shown in Section 5 of the paper.   
%}
%\subsection{Solution}
%
%Based on the above analysis, the essential is to resist the large magnitude of $\lambda(\Sigma_{\x{}})$.
%We propose  a simple solution and add one BN layer before the last linear layer to normalize its input.  We refer to this residual network as ResNet$_{LastBN}$, and the original one as ResNet.
%We also provide the analysis on the last linear layer of ResNet$_{LastBN}$, ans we show the comparison between ResNet and  ResNet$_{LastBN}$ on the 1202-layer  in Figure \ref{fig:problem-LastBN}. We observe that ResNet$_{LastBN}$ can steadily train. It does not encounter the state of weight domination or  large magnitude of $\x{}$ in the last linear layer.
%%We observe that the optimization landscape of the last linear layer is well-conditioned for ResNet$_{LastBN}$ and the training loss of the 1202-layer ResNet$_{LastBN}$ decreases remarkably in the first 100 iterations (For more details, see the \TODO{supplementary materials}.).
%
%We try a similar solution where a constant is divided before the linear layer, and we find it also benefits the training. However, the main disadvantage of this solution is that the value of the constant has to be finely tuned on the networks with different depths.
%We also try a solution to put one BN before the average pooling, it has similar effects as the one before the last linear layer. We  note that Bjorck \etal \cite{2018_NIPS_Bjorck} propose to train a 110-layer residual network with only one BN layer that is put before the average pooling. They show it achieves good results. We argue that this is not true for the very deep networks. We perform an experiments on the 1202 layer residual network, and we find that the model always has a fail in training with various hyper-parameters.


\clearpage
% ---- Bibliography ----
%
% BibTeX users should specify bibliography style 'splncs04'.
% References will then be sorted and formatted in the correct style.
%
\bibliographystyle{splncs04}
\bibliography{conditioning}
%\appendix
%\section{Appendix}


\end{document}
