# Supplementary material (part 2 of 3)
Source: ML conference proceedings conference paper supplement (https://www.ecva.net/papers/eccv_2020/papers_ECCV/html/123470375_ECCV_2020_paper.php)

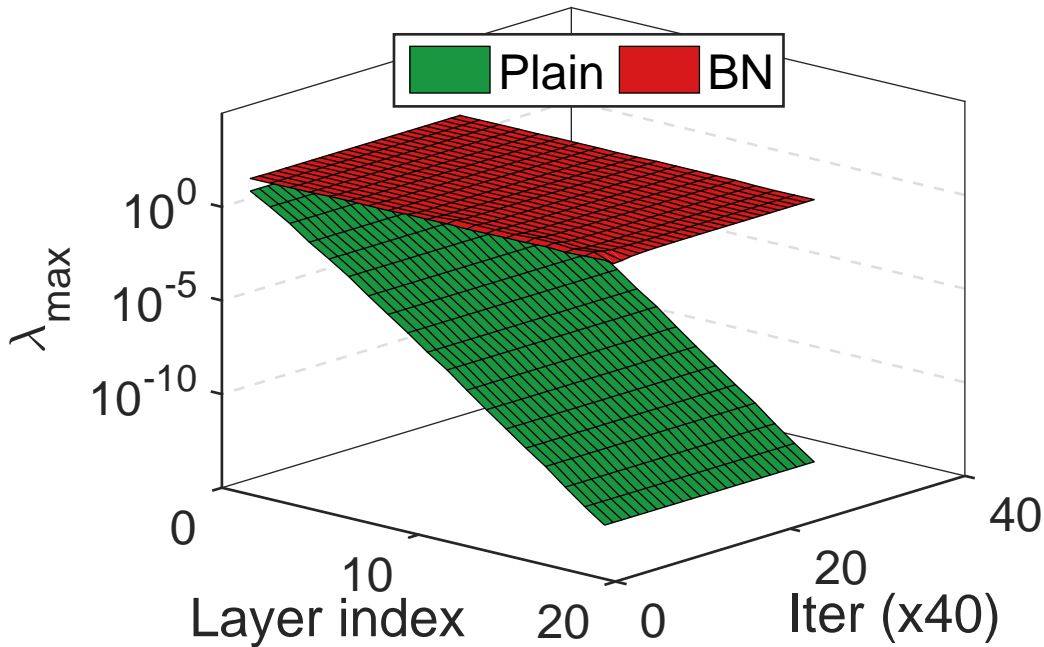

Supplement: Supplementary file 101 [file 123470375-supp.zip]

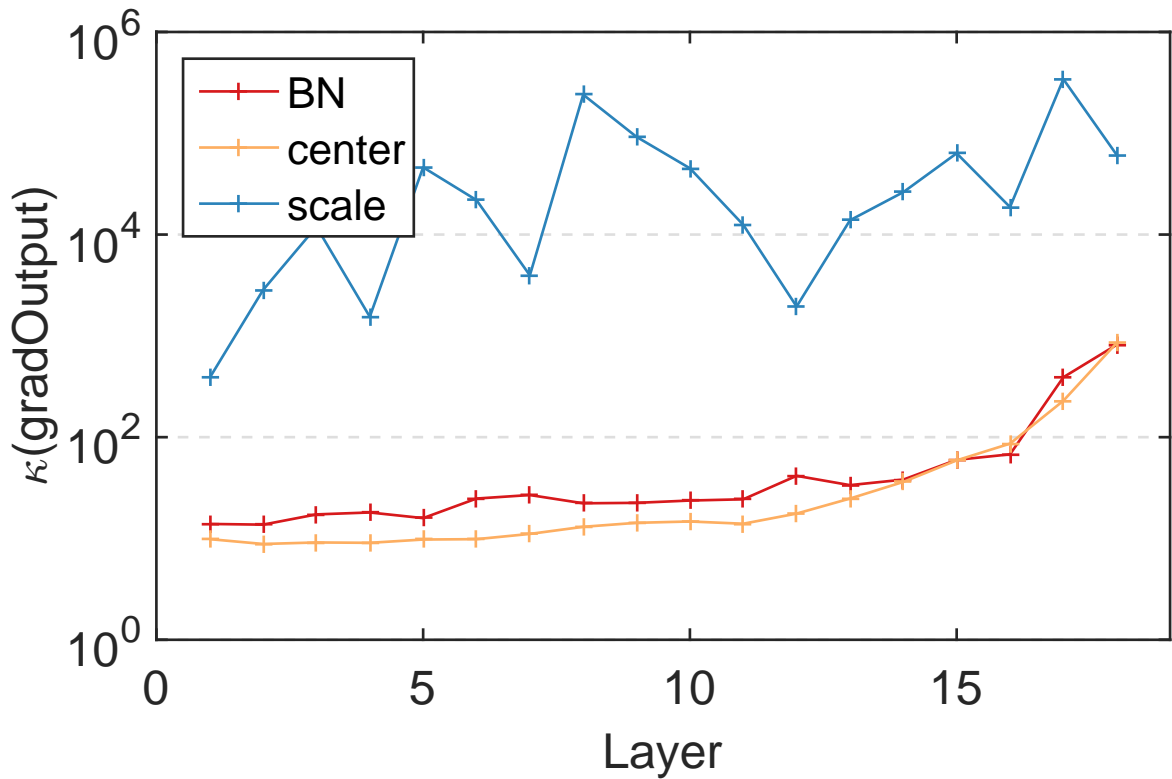

Supplement: Supplementary file 102 [file 123470375-supp.zip]

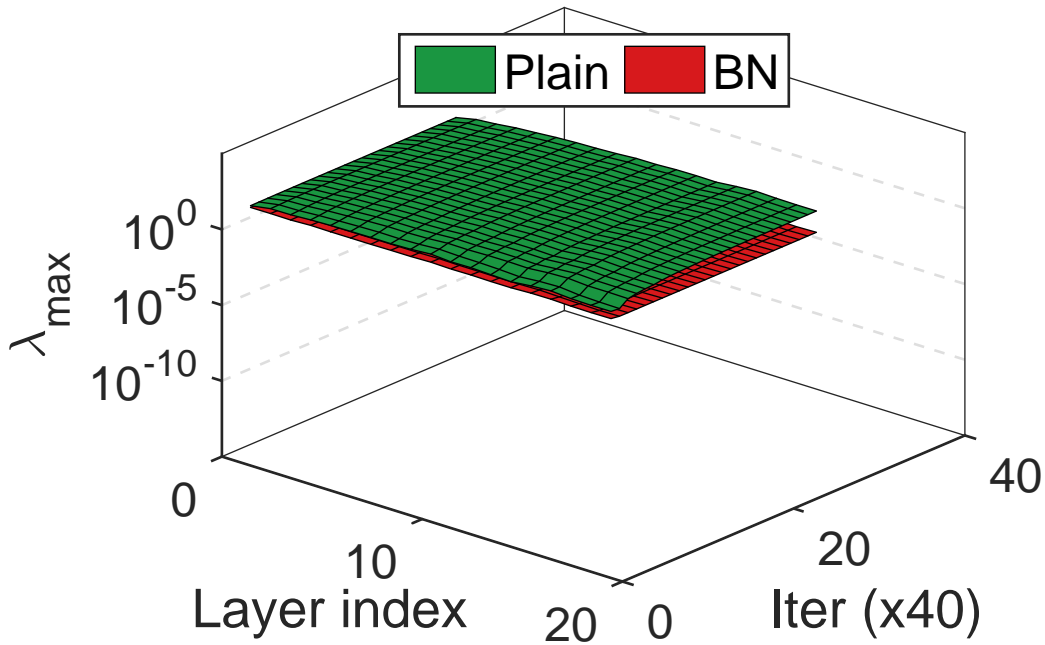

Supplement: Supplementary file 103 [file 123470375-supp.zip]

$\lambda_{\max}(\text{gradOutput})$

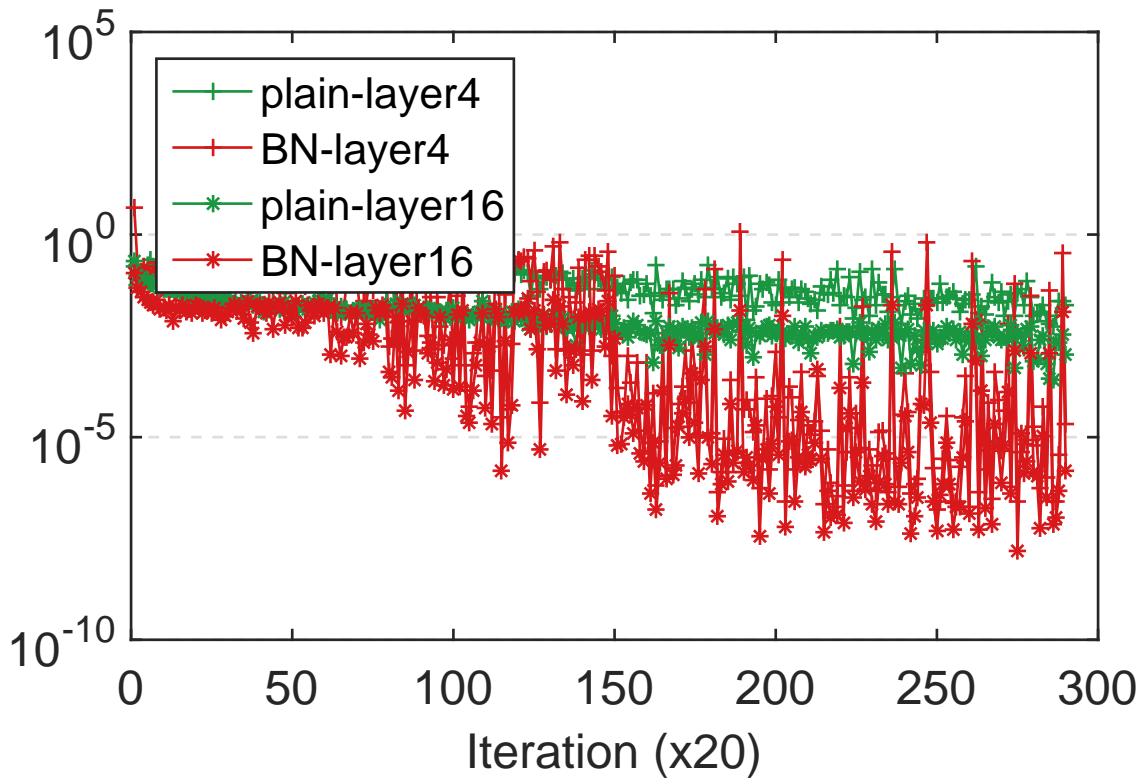

Supplement: Supplementary file 104 [file 123470375-supp.zip]

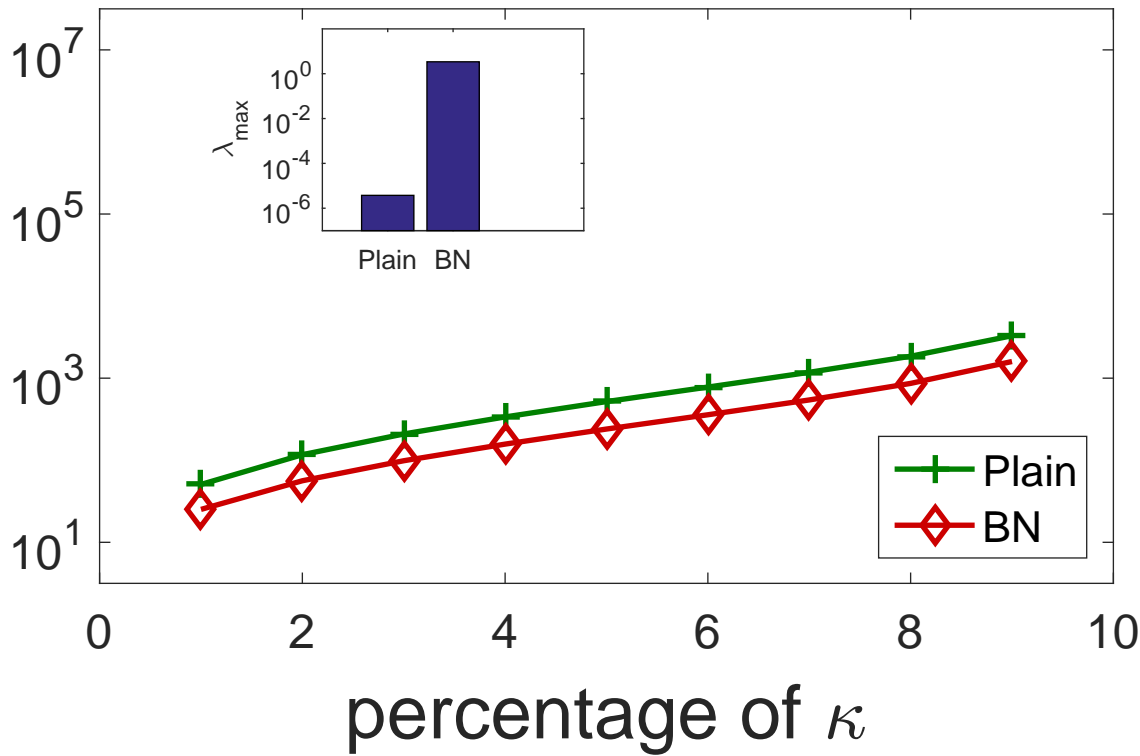

Supplement: Supplementary file 105 [file 123470375-supp.zip]

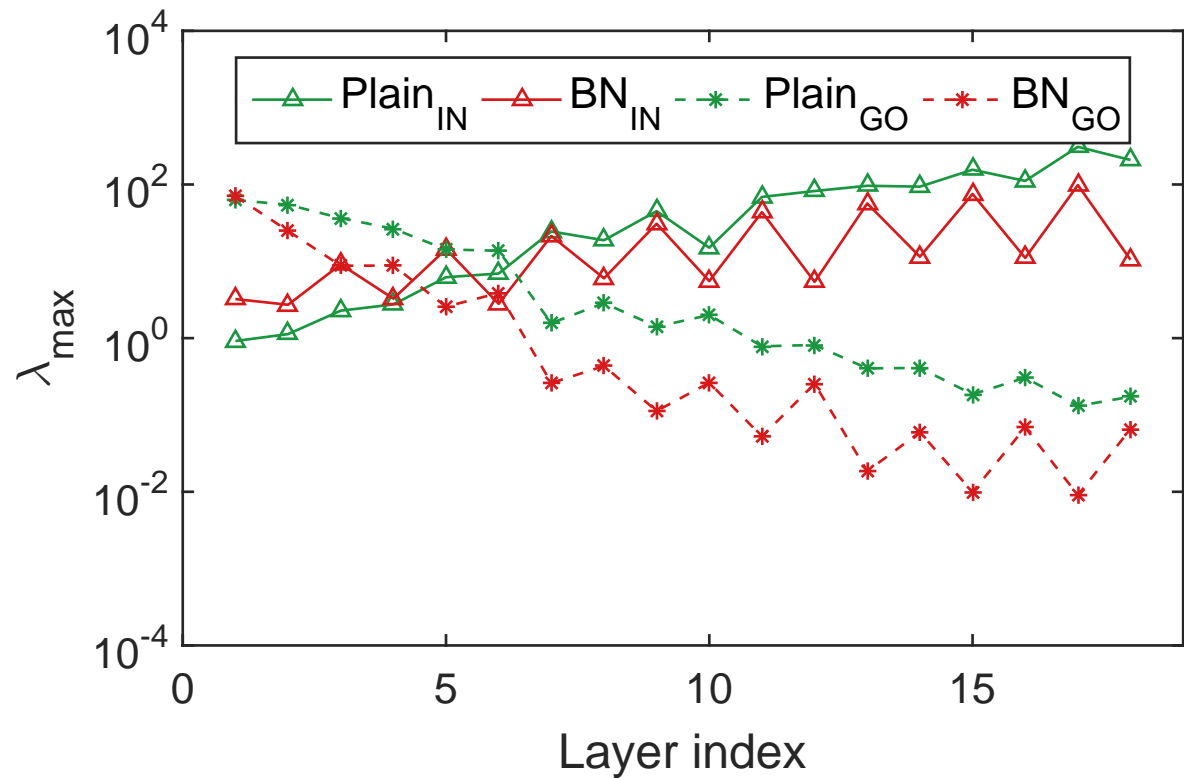

Supplement: Supplementary file 106 [file 123470375-supp.zip]

Error (%)

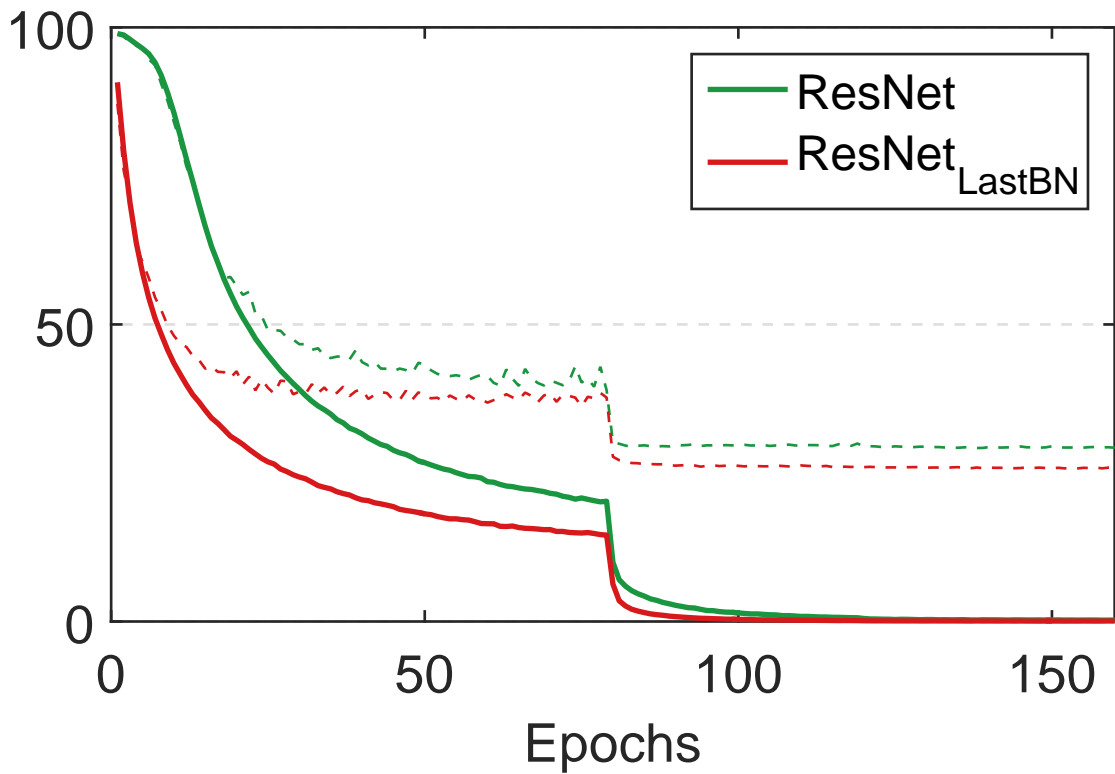

Supplement: Supplementary file 107 [file 123470375-supp.zip]

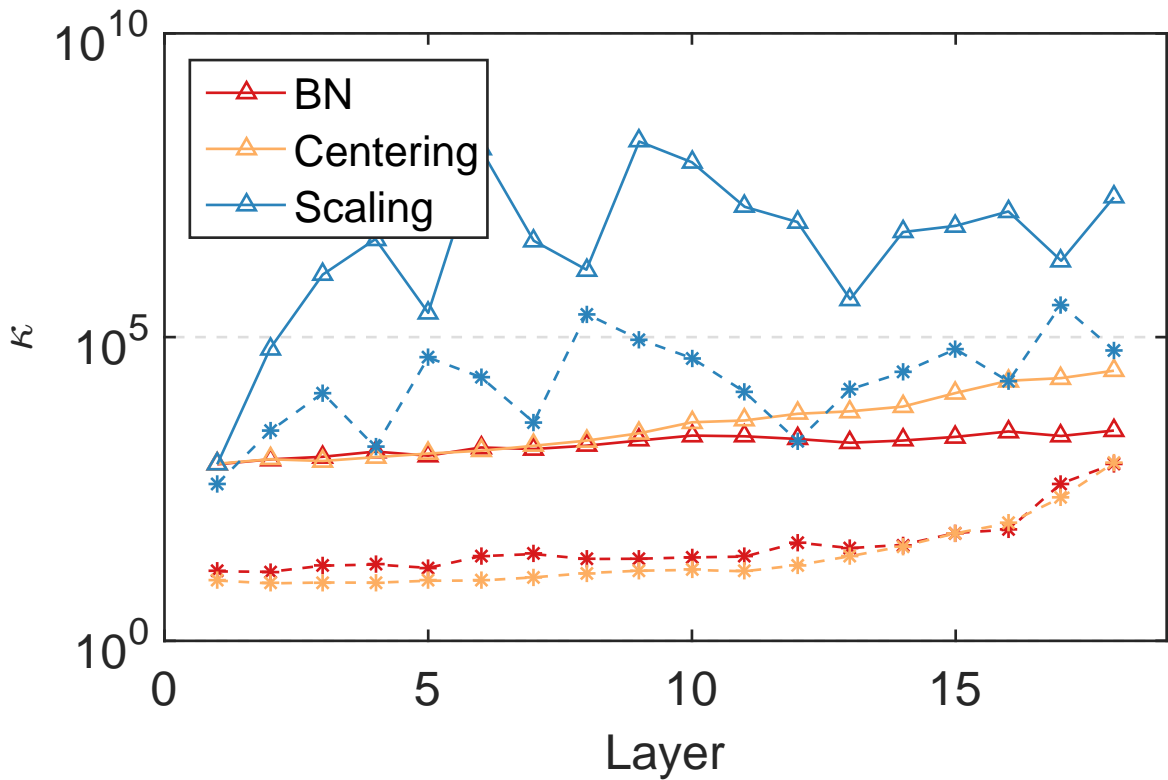

Supplement: Supplementary file 108 [file 123470375-supp.zip]

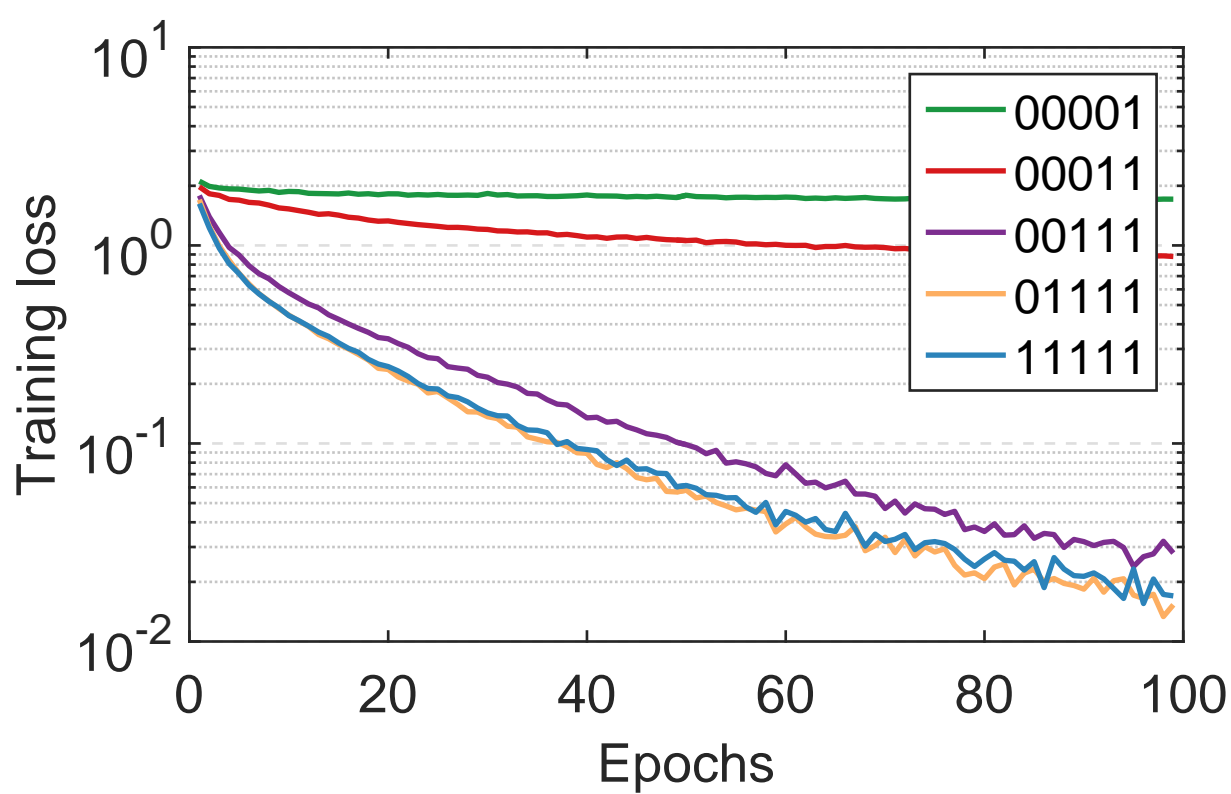

Supplement: Supplementary file 109 [file 123470375-supp.zip]

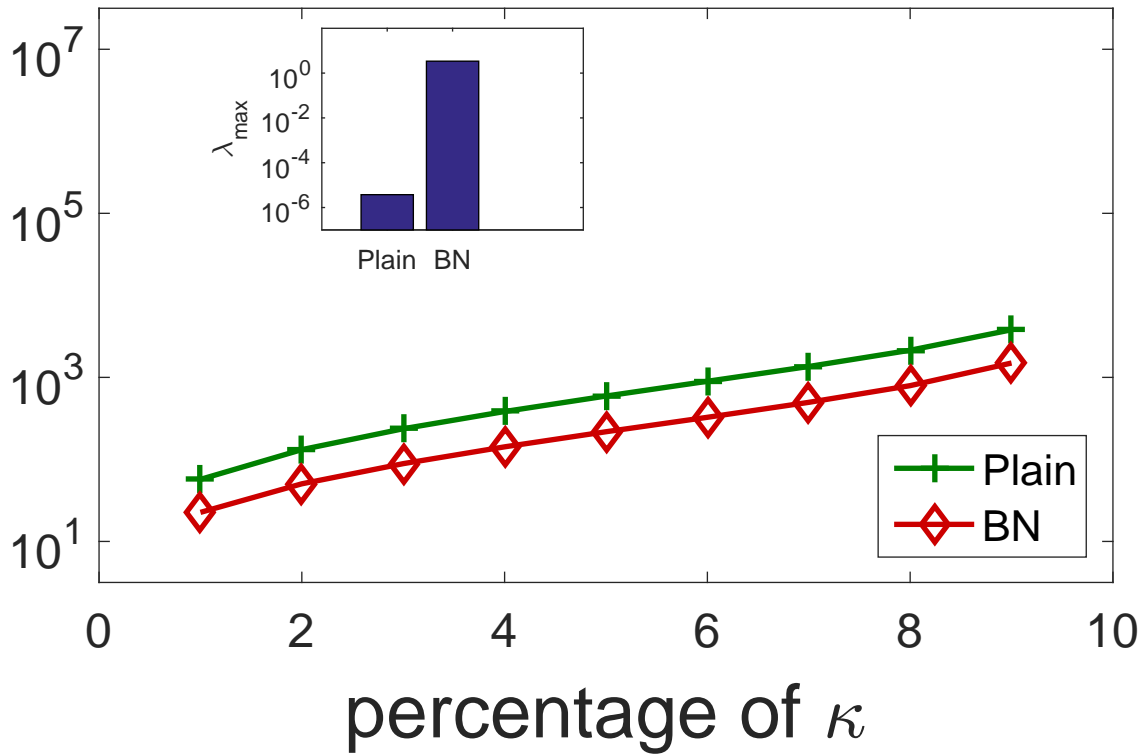

Supplement: Supplementary file 110 [file 123470375-supp.zip]

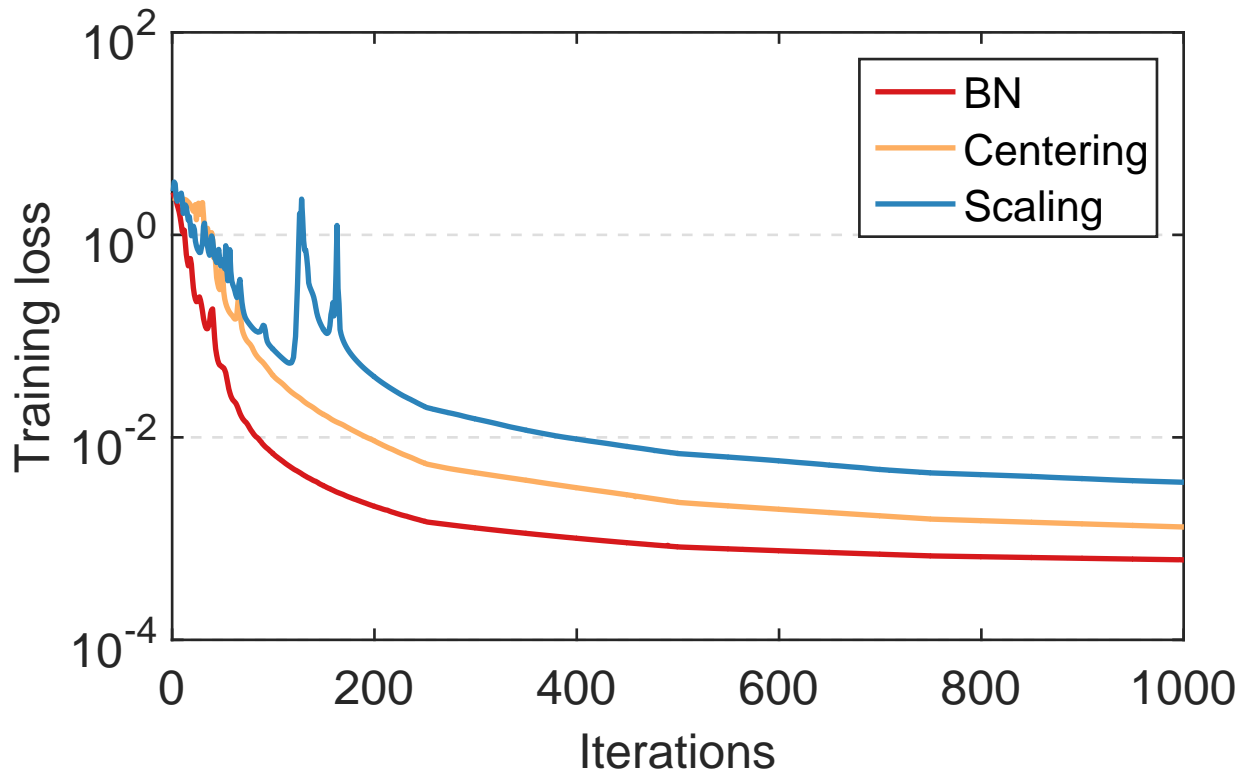

Supplement: Supplementary file 111 [file 123470375-supp.zip]

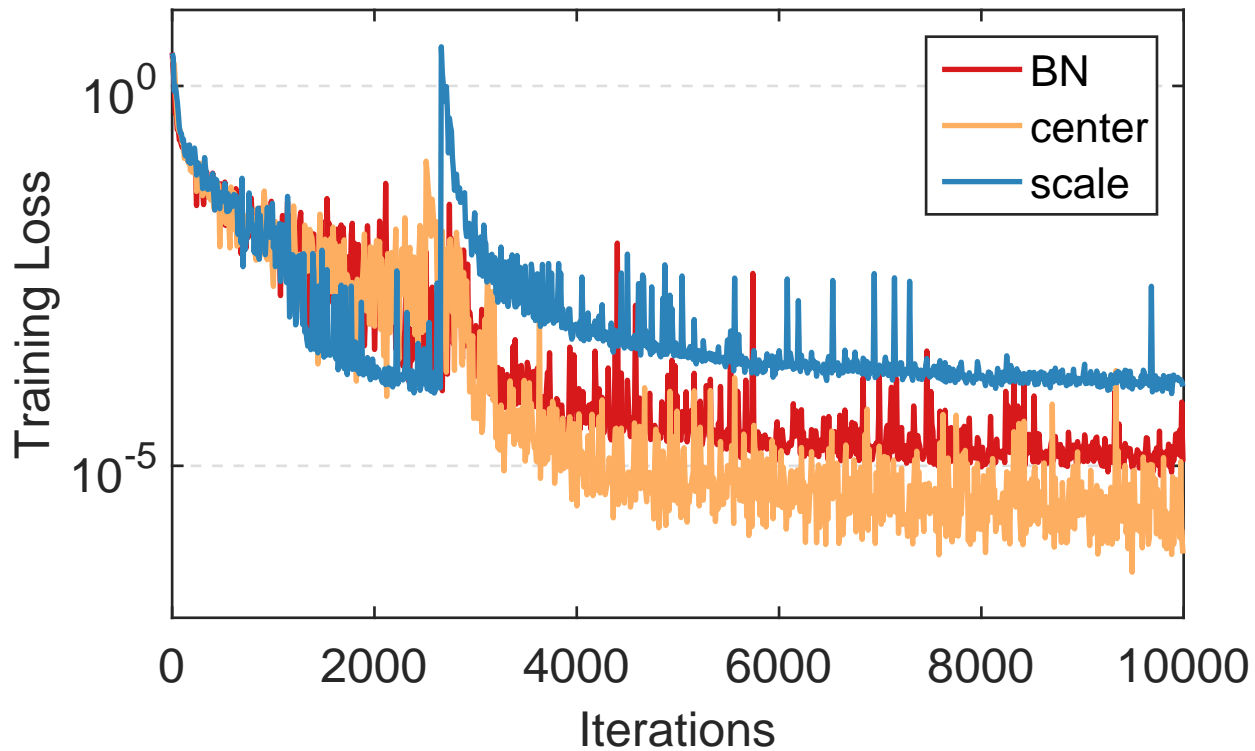

Supplement: Supplementary file 112 [file 123470375-supp.zip]

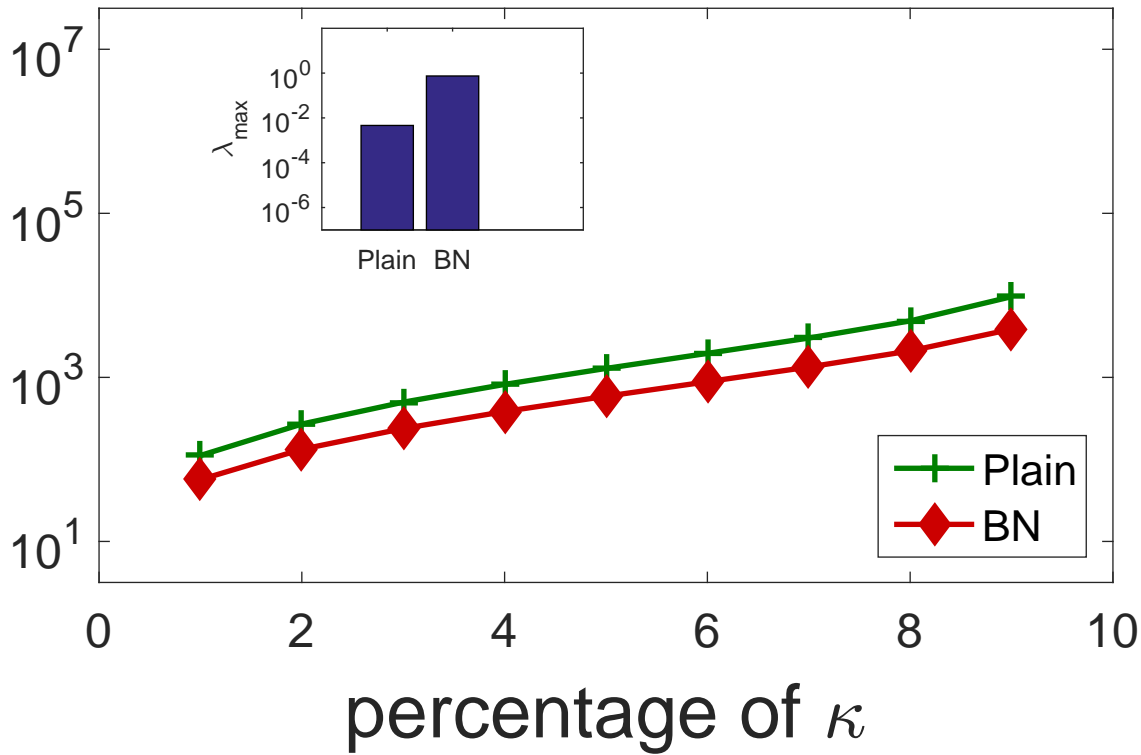

Supplement: Supplementary file 113 [file 123470375-supp.zip]

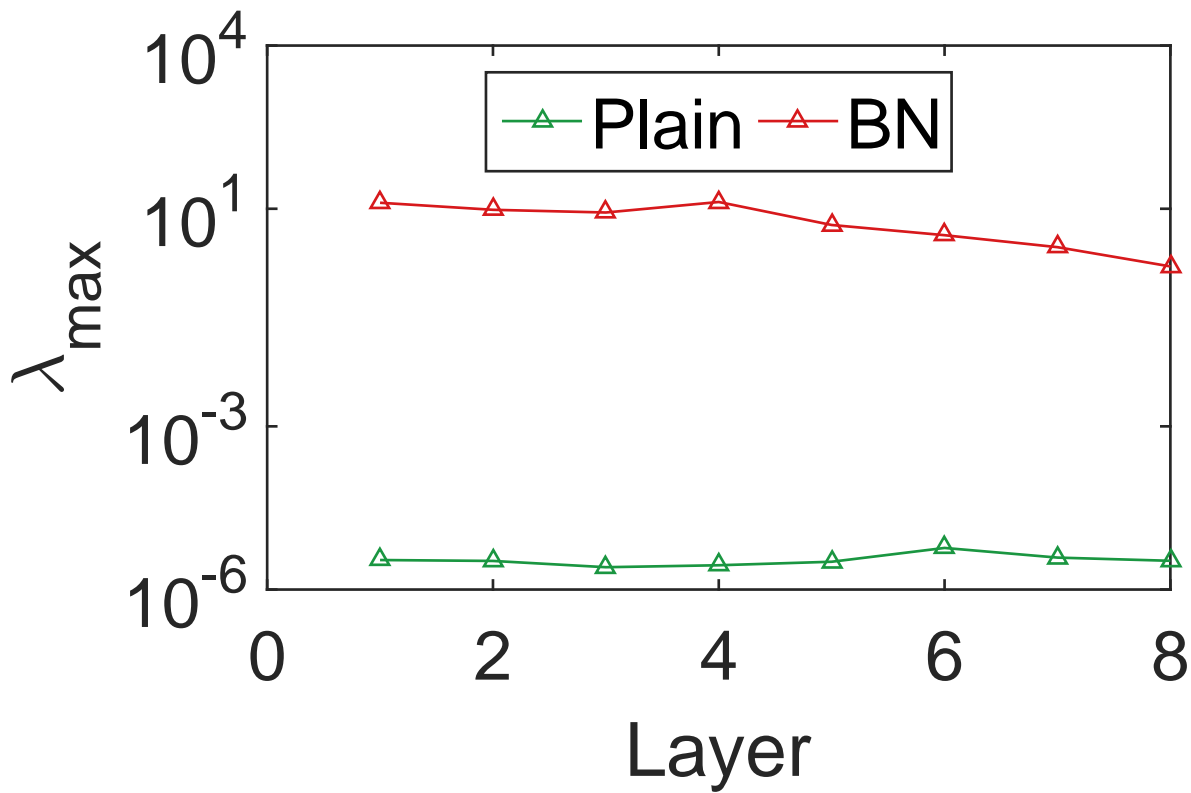

Supplement: Supplementary file 114 [file 123470375-supp.zip]

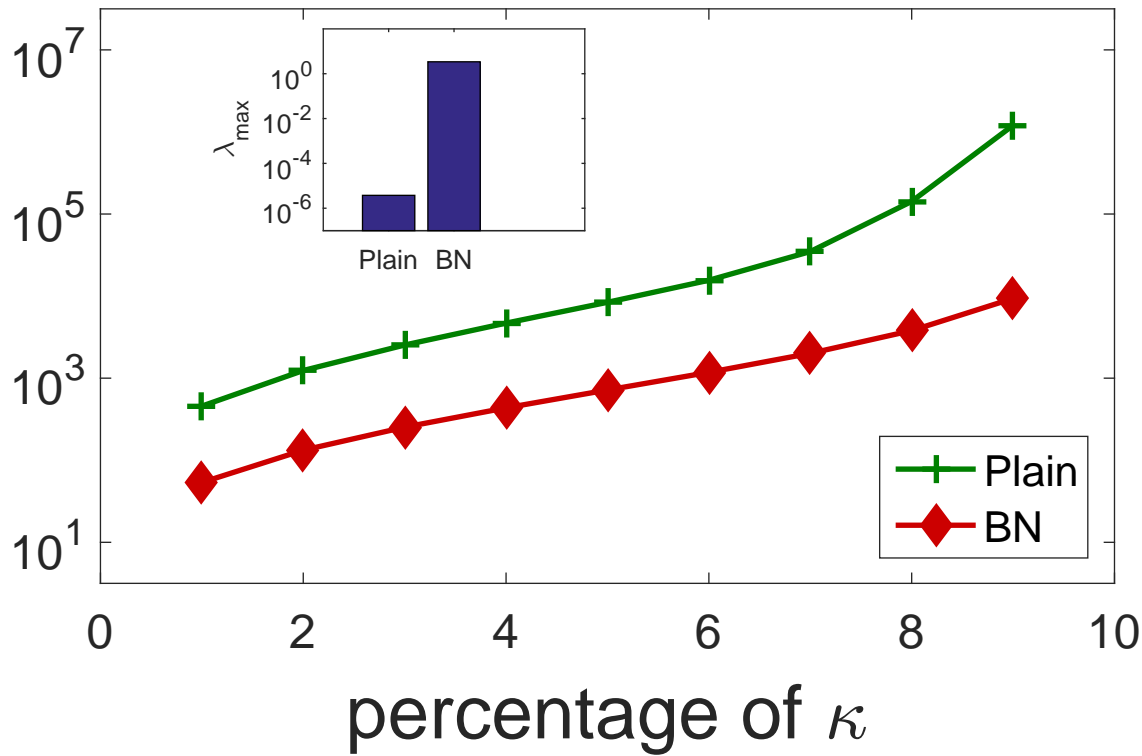

Supplement: Supplementary file 115 [file 123470375-supp.zip]

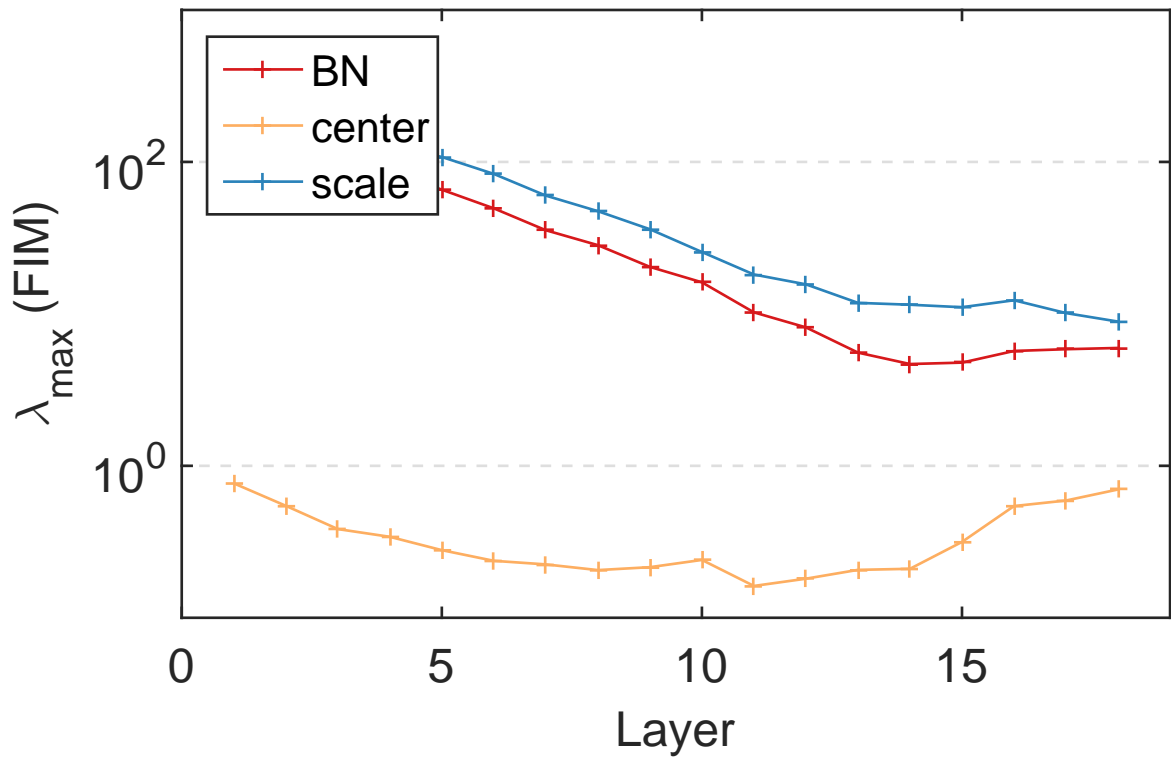

Supplement: Supplementary file 116 [file 123470375-supp.zip]

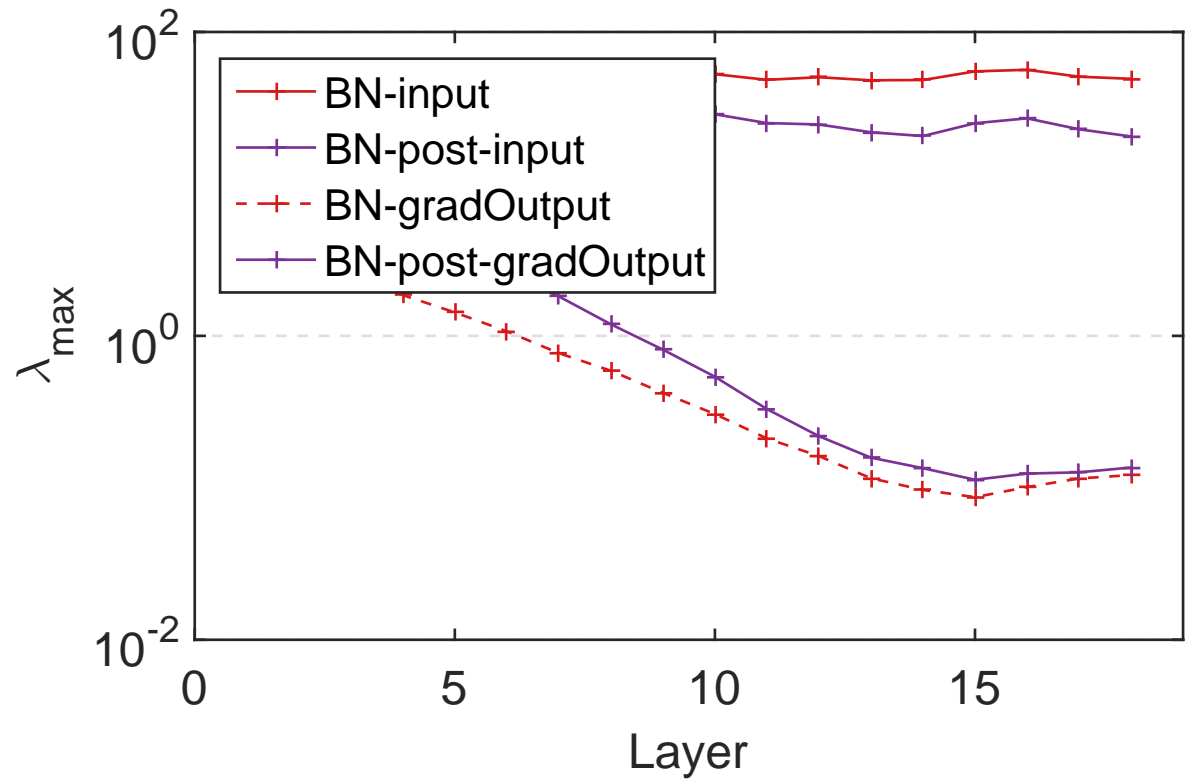

Supplement: Supplementary file 117 [file 123470375-supp.zip]

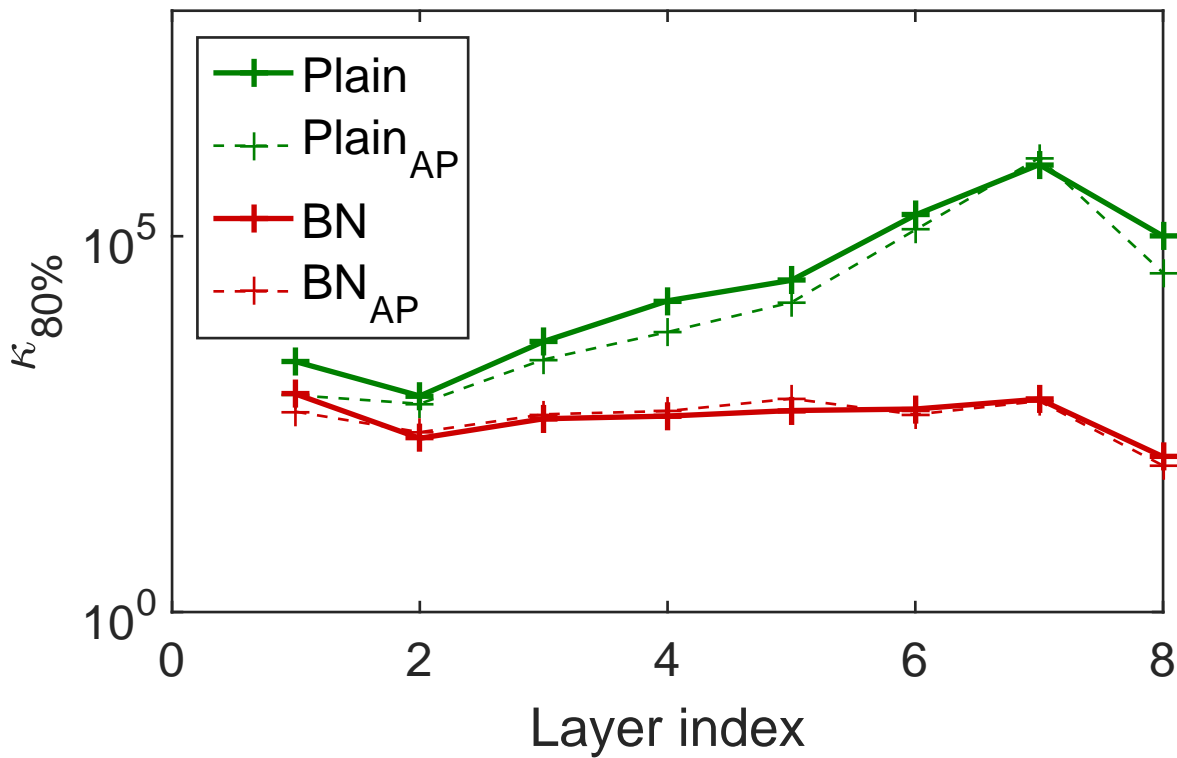

Supplement: Supplementary file 118 [file 123470375-supp.zip]

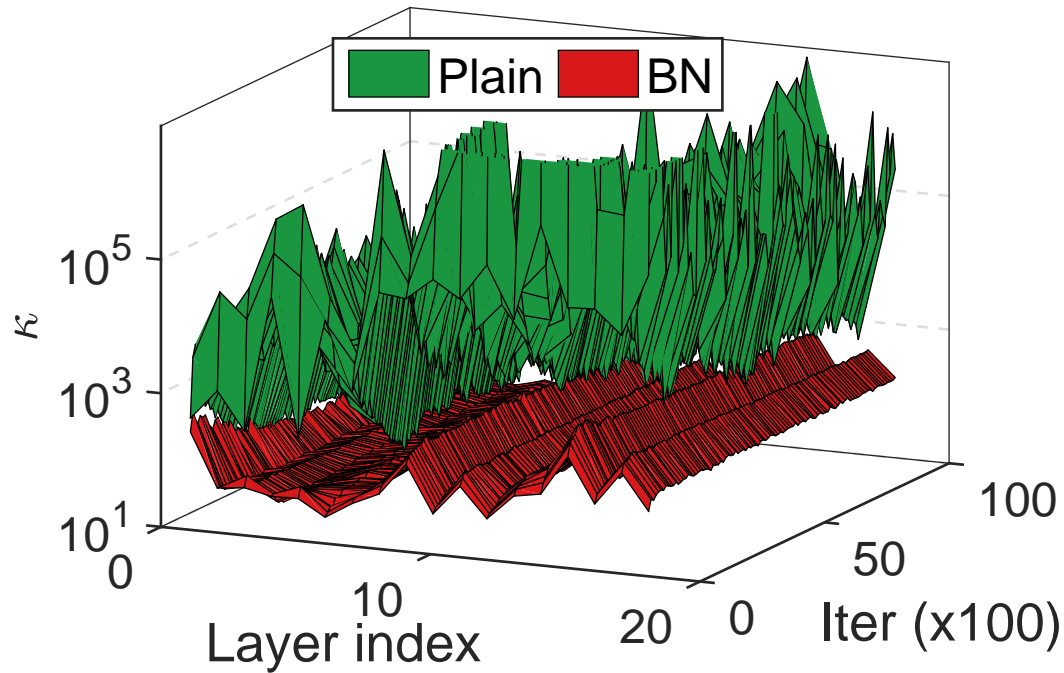

Supplement: Supplementary file 119 [file 123470375-supp.zip]

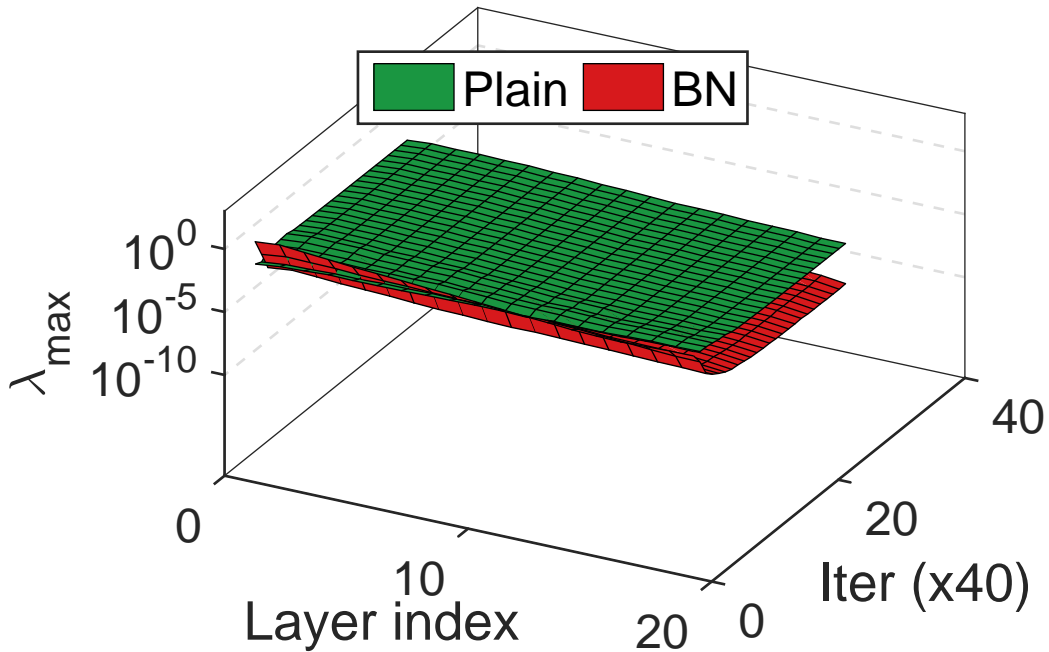

Supplement: Supplementary file 120 [file 123470375-supp.zip]

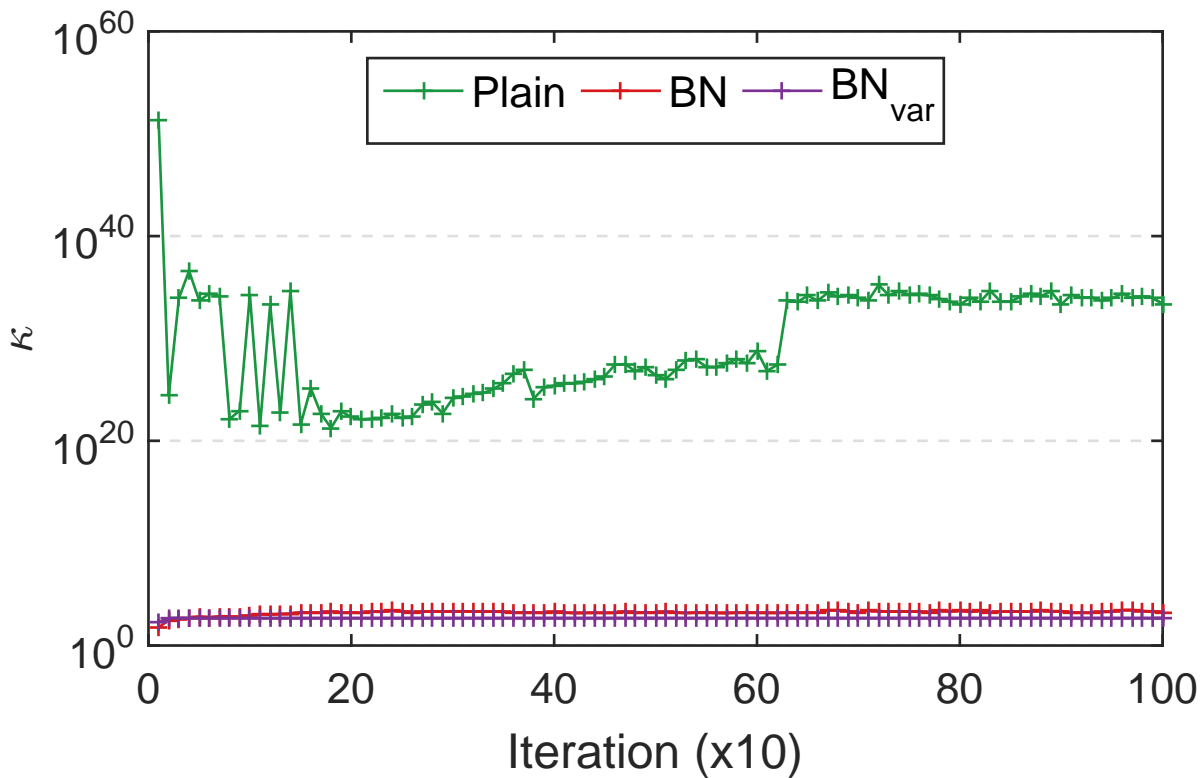

Supplement: Supplementary file 121 [file 123470375-supp.zip]

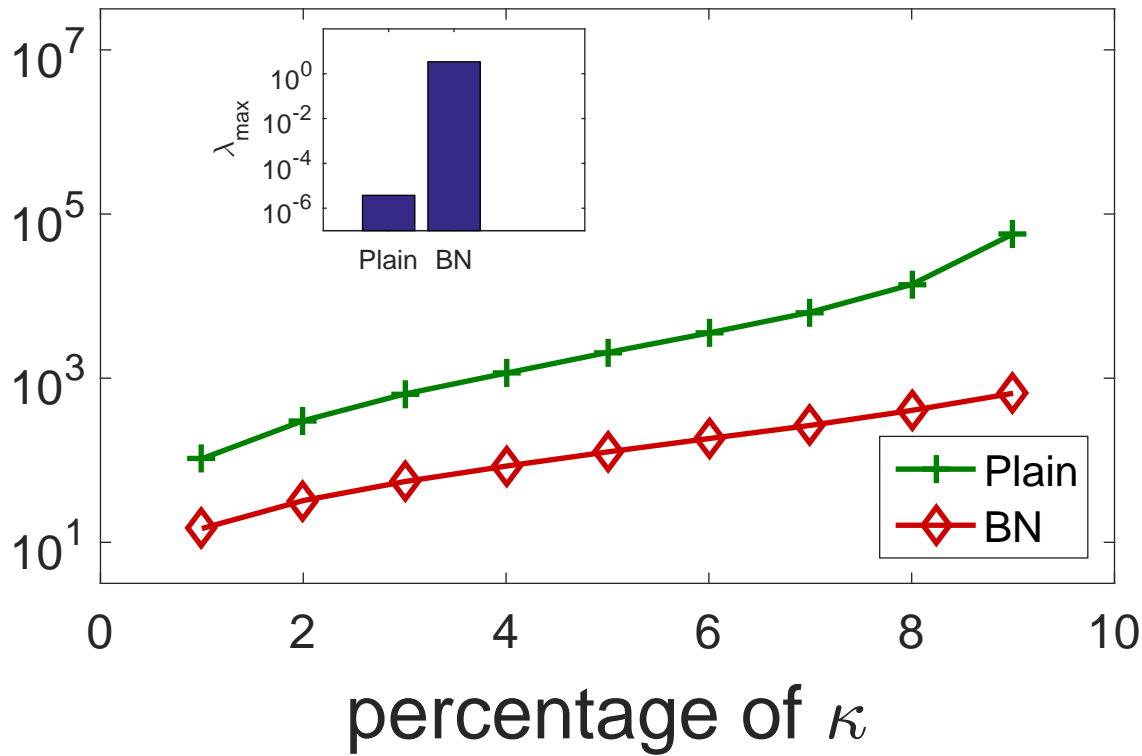

Supplement: Supplementary file 122 [file 123470375-supp.zip]

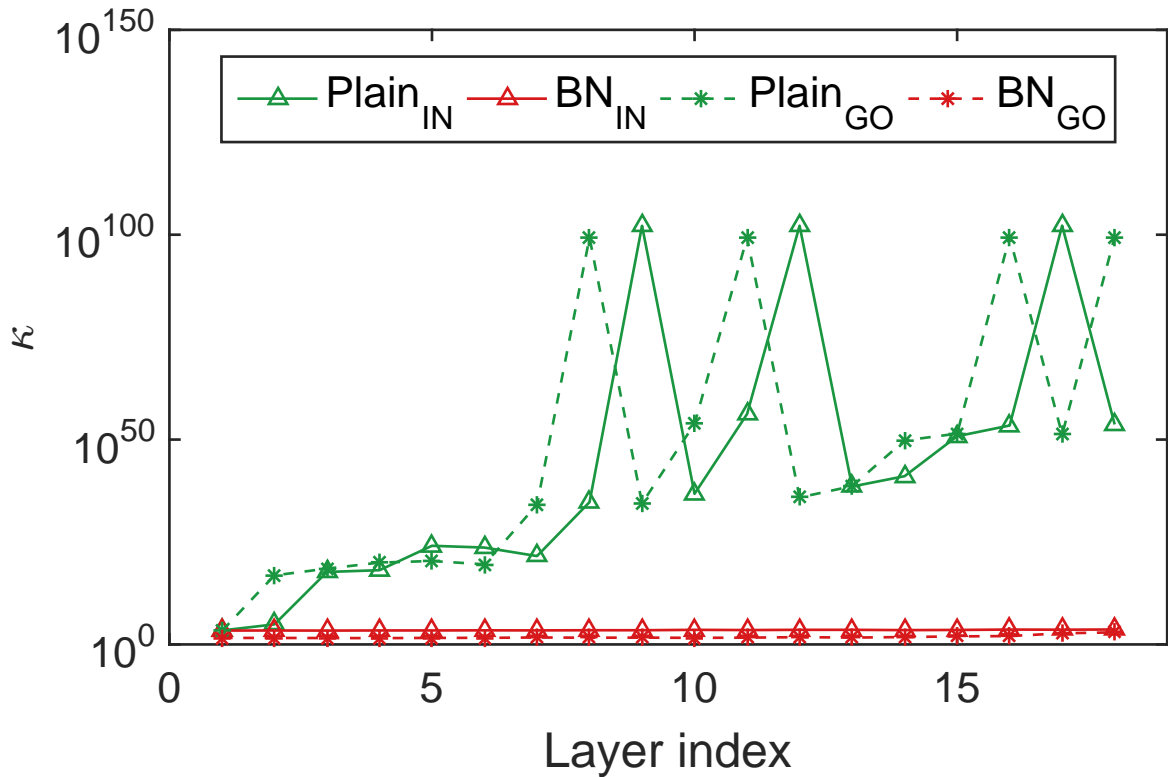

Supplement: Supplementary file 123 [file 123470375-supp.zip]

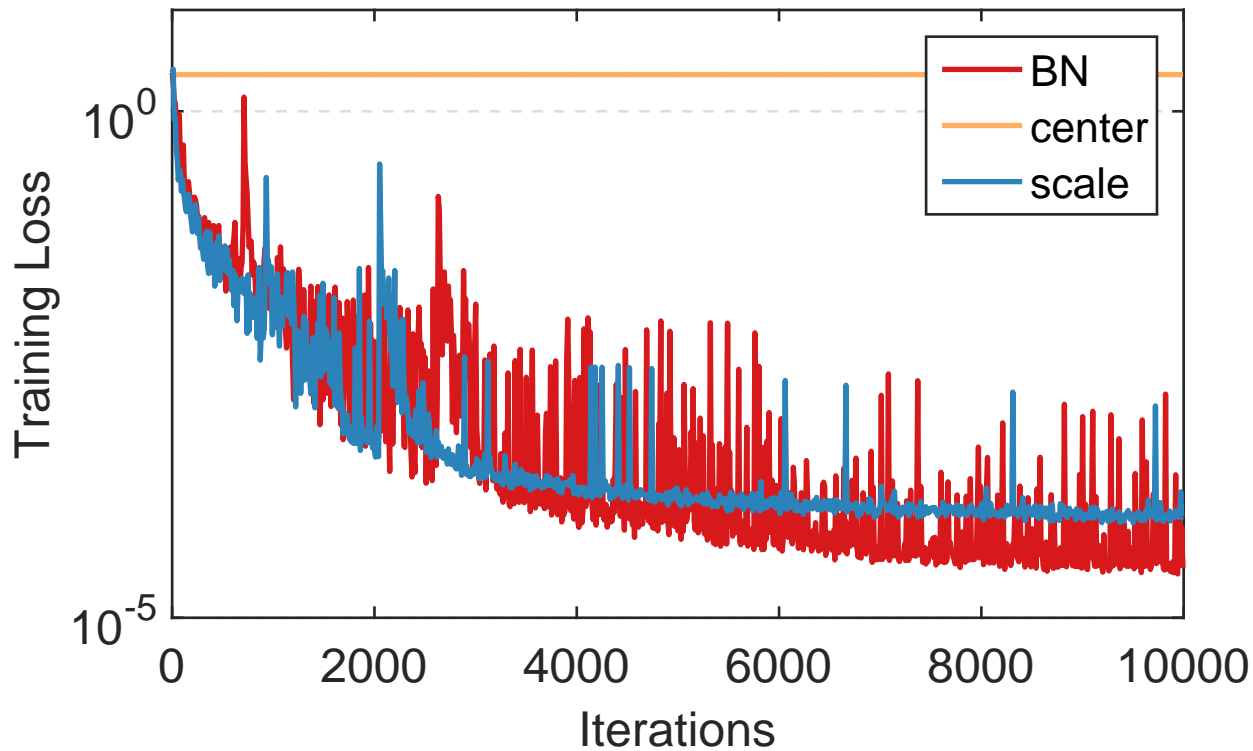

Supplement: Supplementary file 124 [file 123470375-supp.zip]

Ratio of dying-neuron

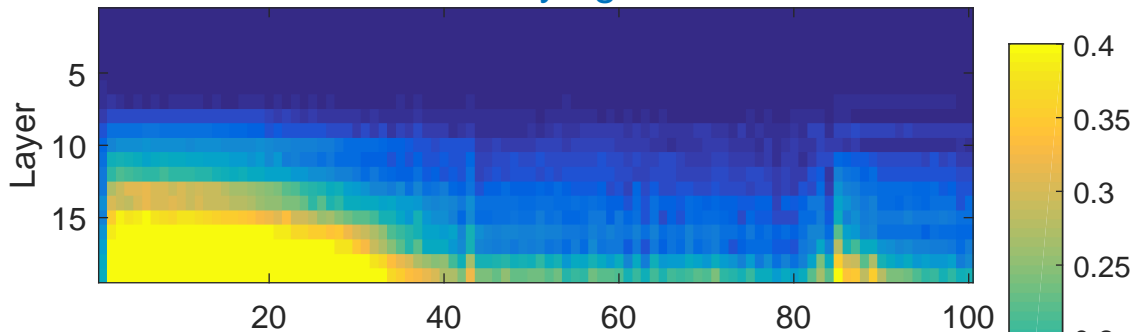

Ratio of fulfilling-neuron

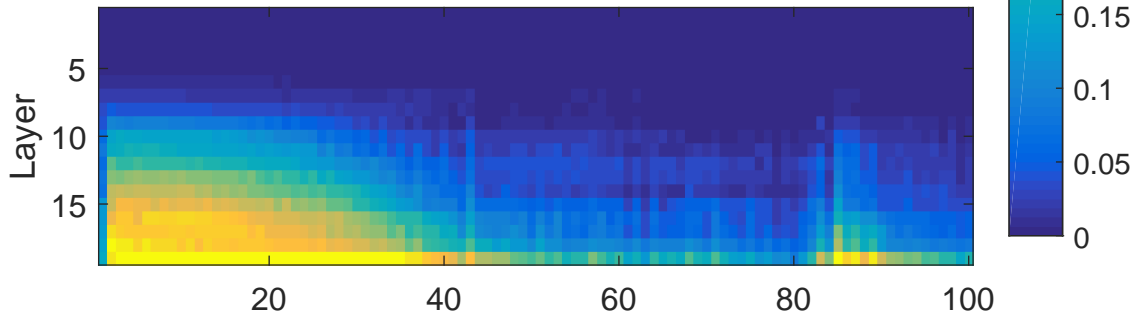

Supplement: Supplementary file 125 [file 123470375-supp.zip]

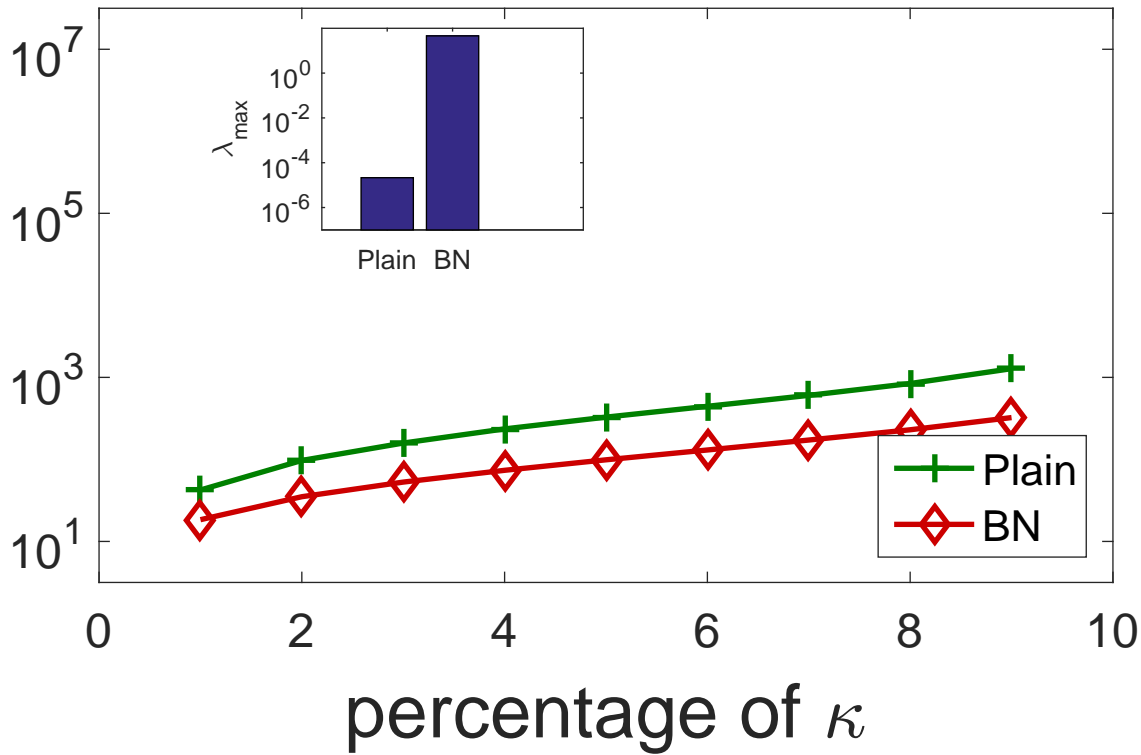

Supplement: Supplementary file 126 [file 123470375-supp.zip]

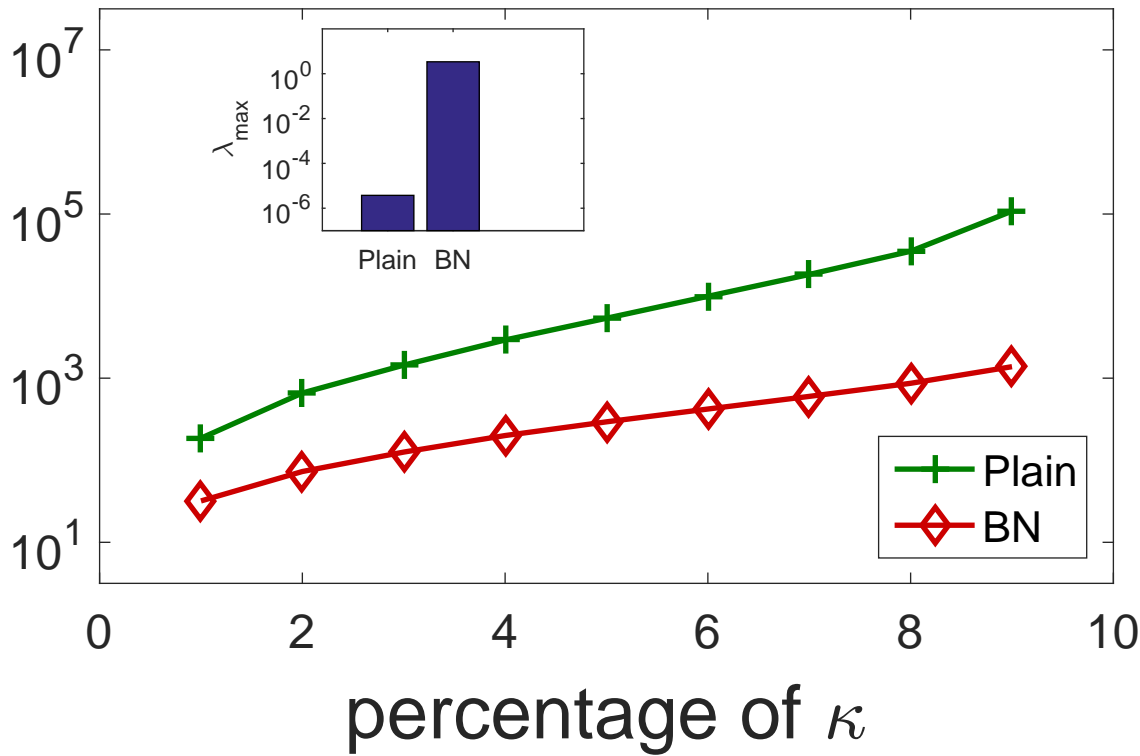

Supplement: Supplementary file 127 [file 123470375-supp.zip]

$\lambda_{\max}$  (input)

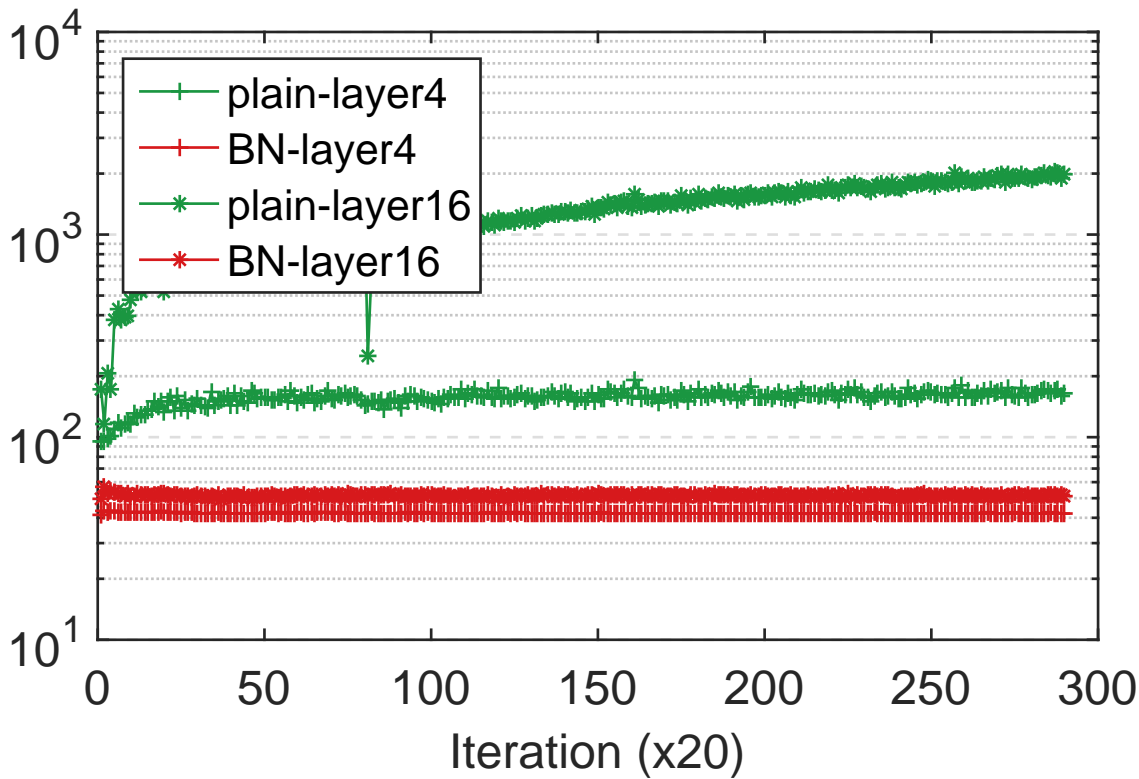

Supplement: Supplementary file 128 [file 123470375-supp.zip]

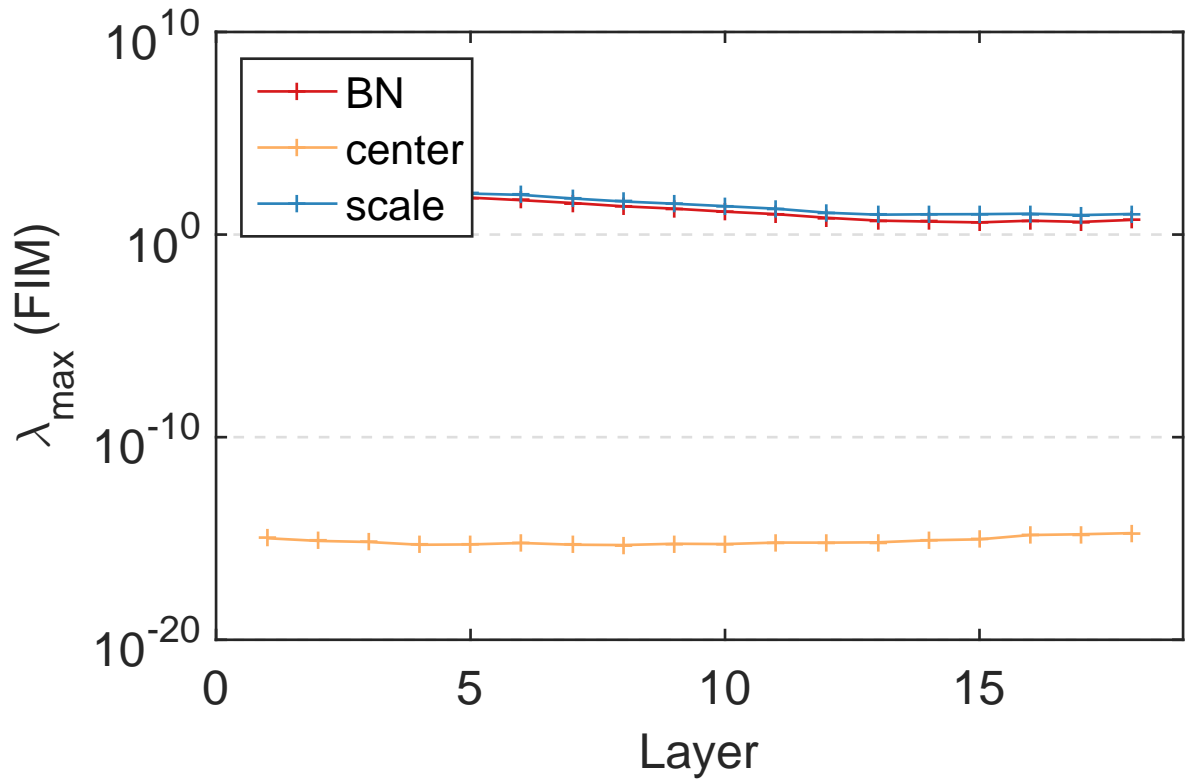

Supplement: Supplementary file 129 [file 123470375-supp.zip]

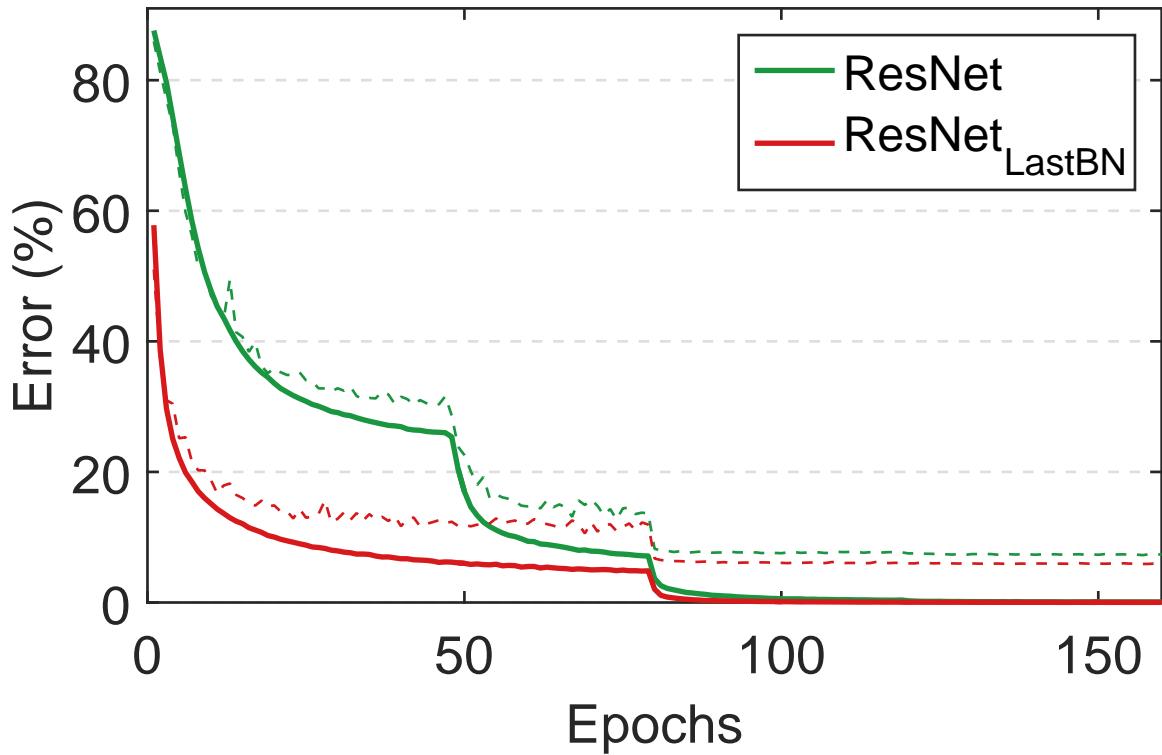

Supplement: Supplementary file 130 [file 123470375-supp.zip]

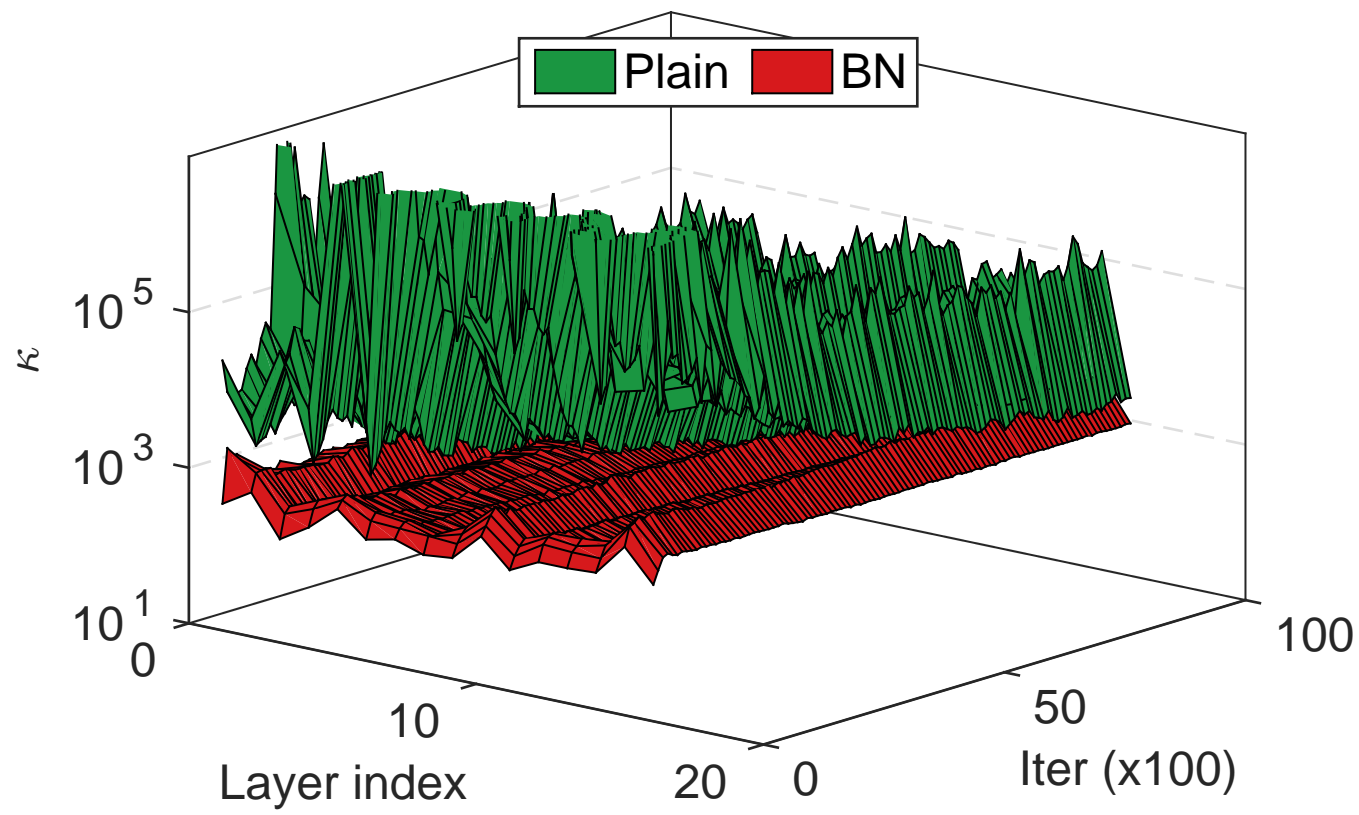

Supplement: Supplementary file 131 [file 123470375-supp.zip]

Ratio of dying-neuron

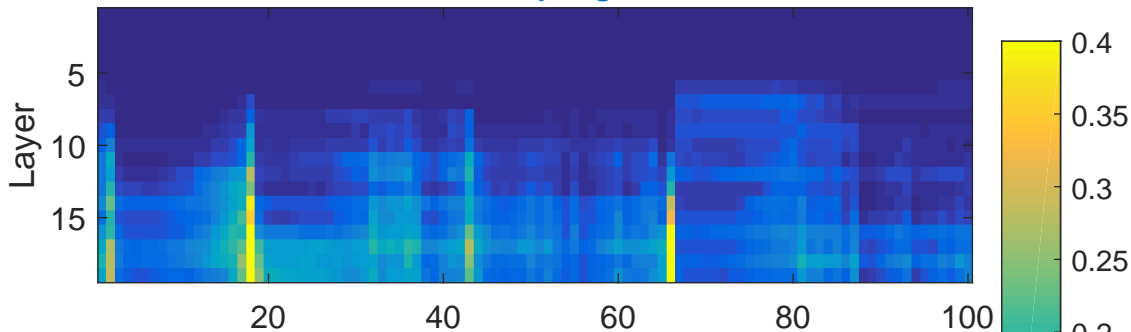

Ratio of fulfilling-neuron

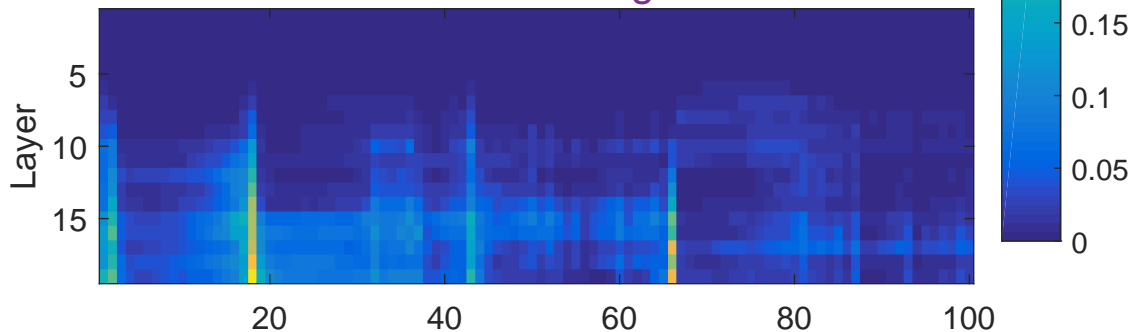

Supplement: Supplementary file 132 [file 123470375-supp.zip]

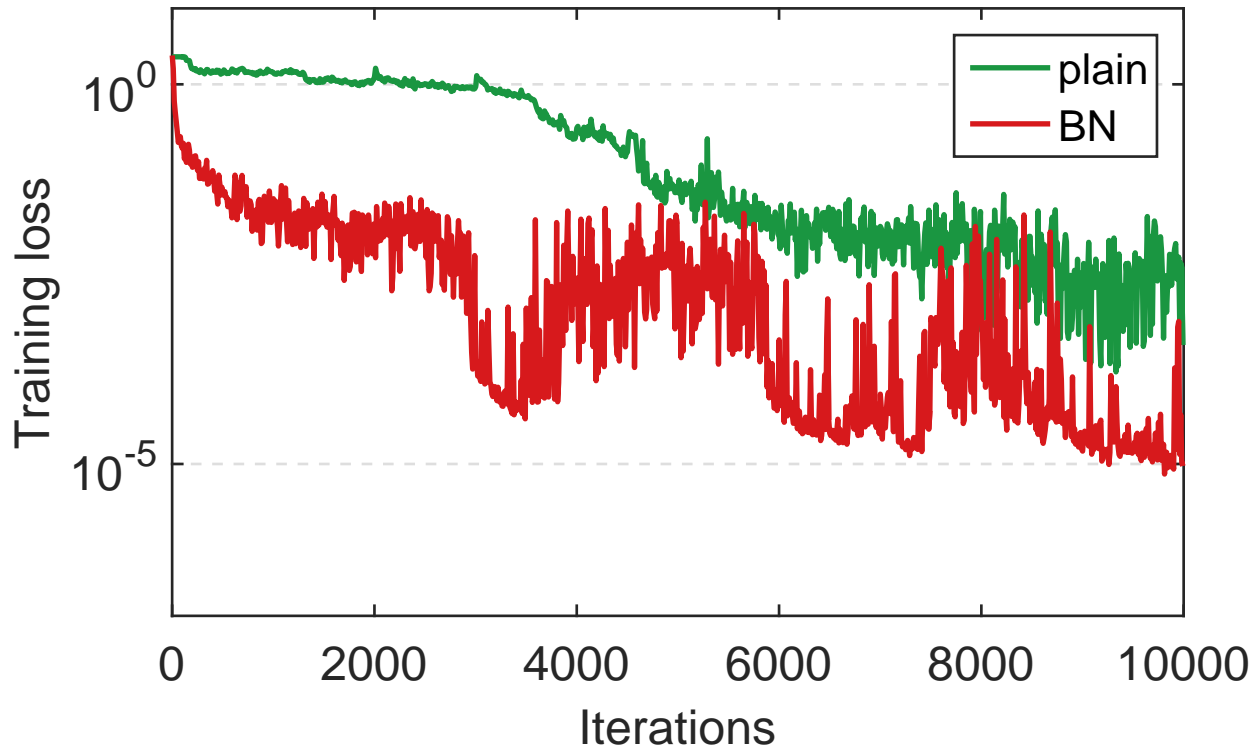

Supplement: Supplementary file 133 [file 123470375-supp.zip]

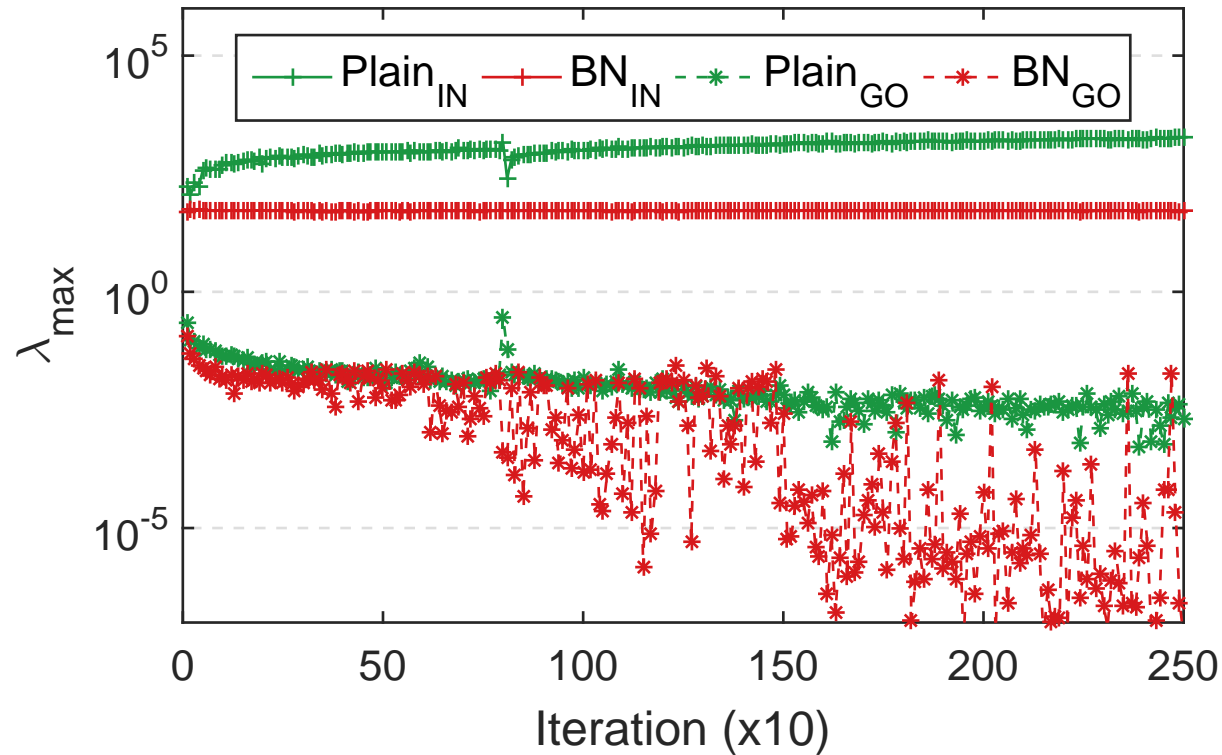

Supplement: Supplementary file 134 [file 123470375-supp.zip]

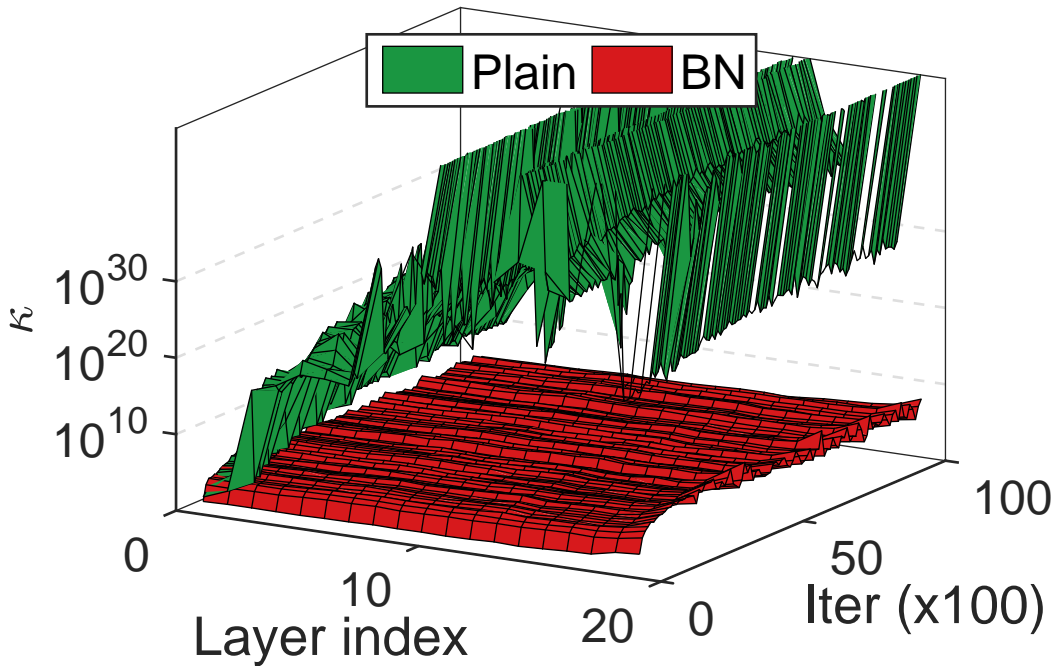

Supplement: Supplementary file 135 [file 123470375-supp.zip]

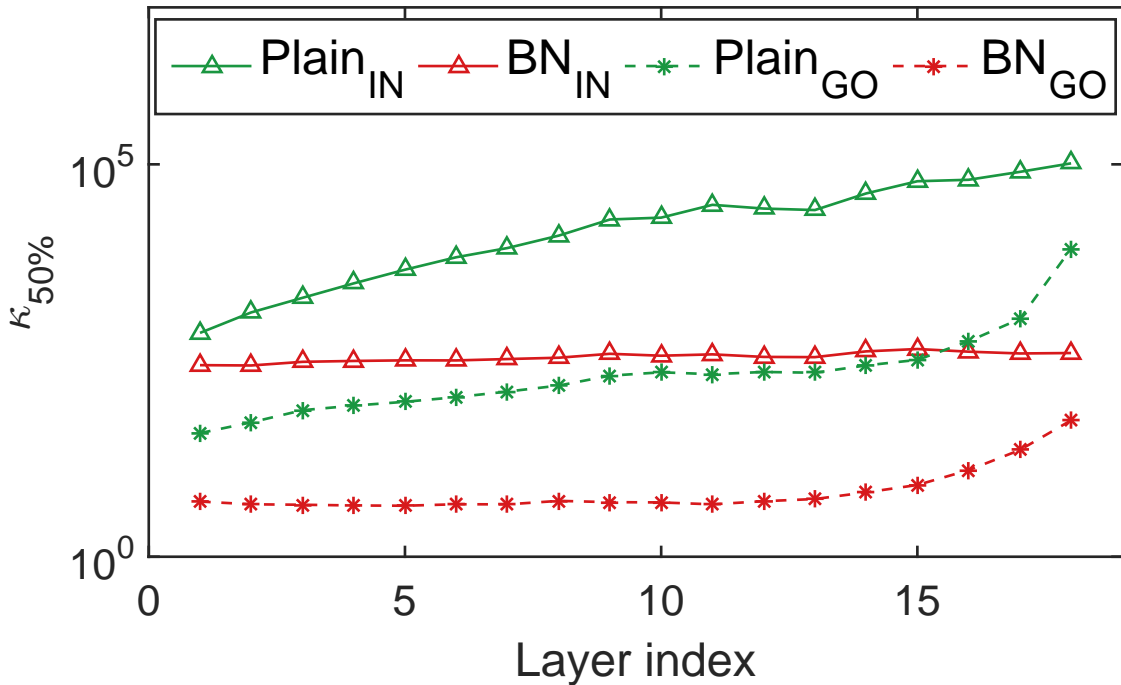

Supplement: Supplementary file 136 [file 123470375-supp.zip]

Training loss

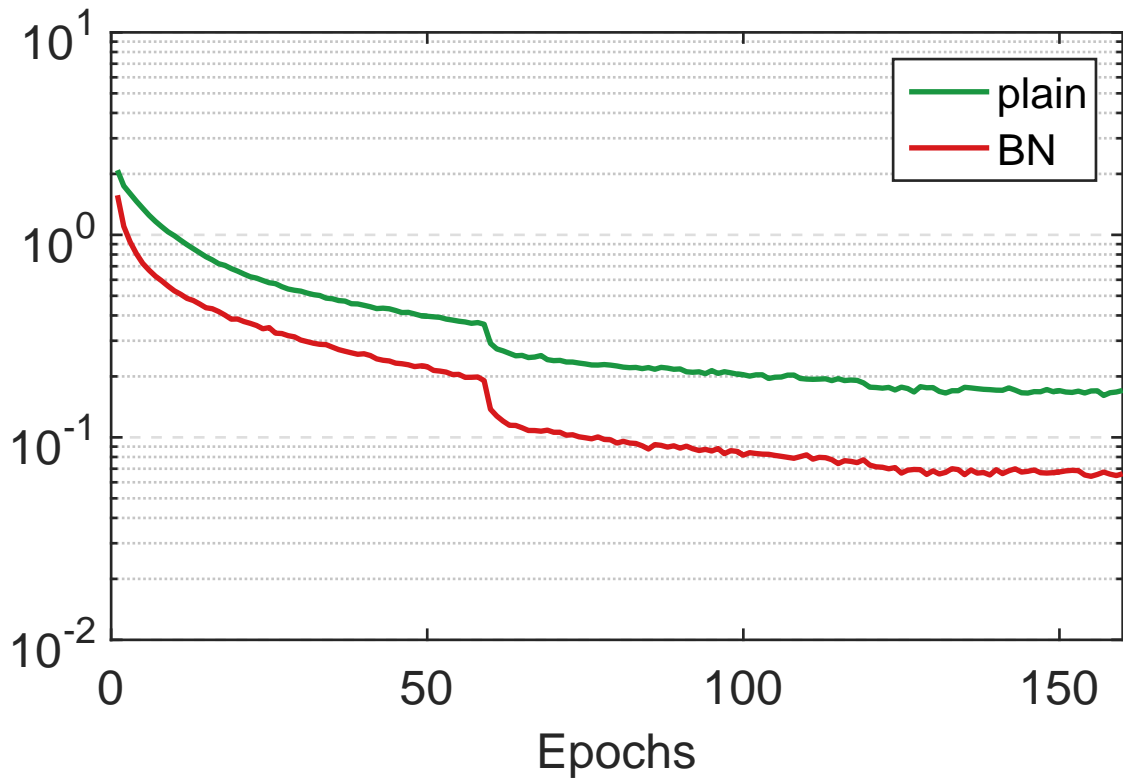

Supplement: Supplementary file 137 [file 123470375-supp.zip]

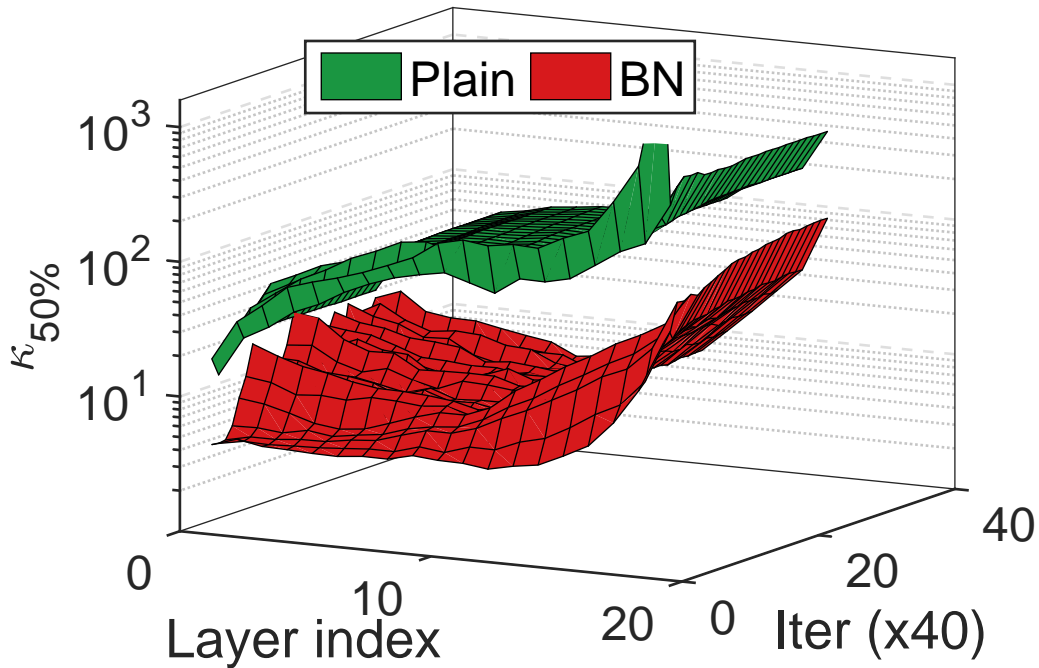

Supplement: Supplementary file 138 [file 123470375-supp.zip]

Training loss

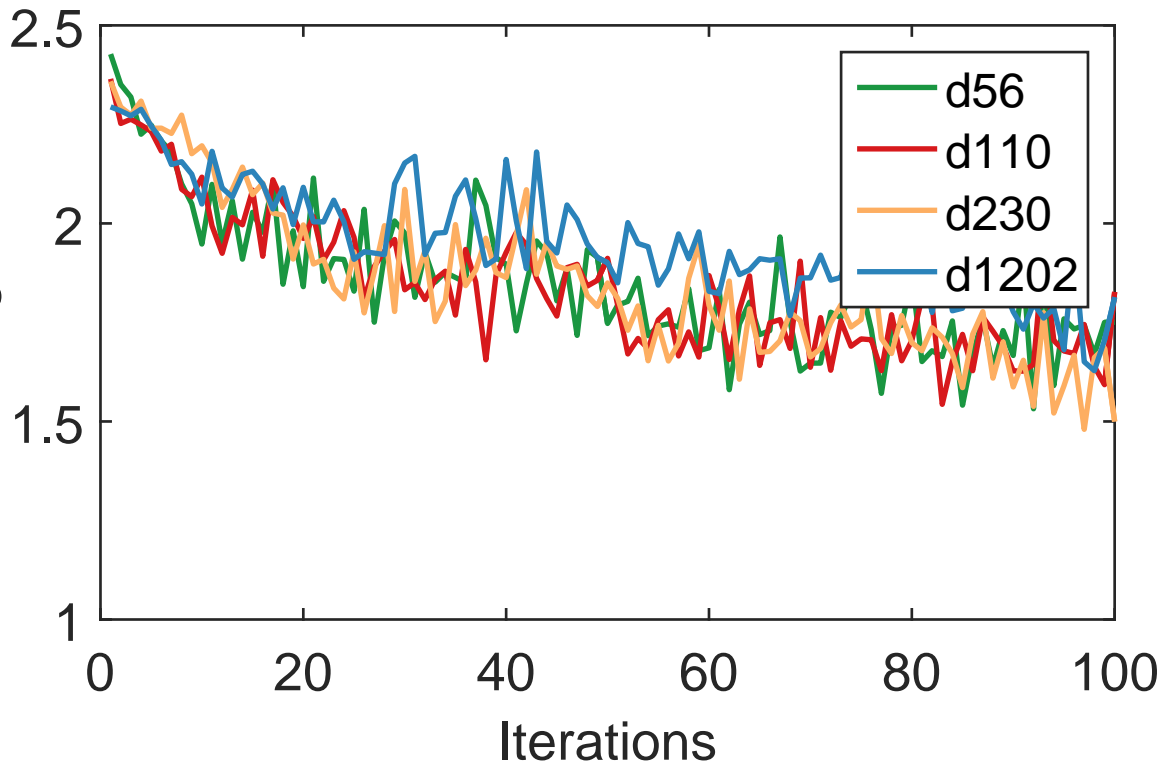

Supplement: Supplementary file 139 [file 123470375-supp.zip]

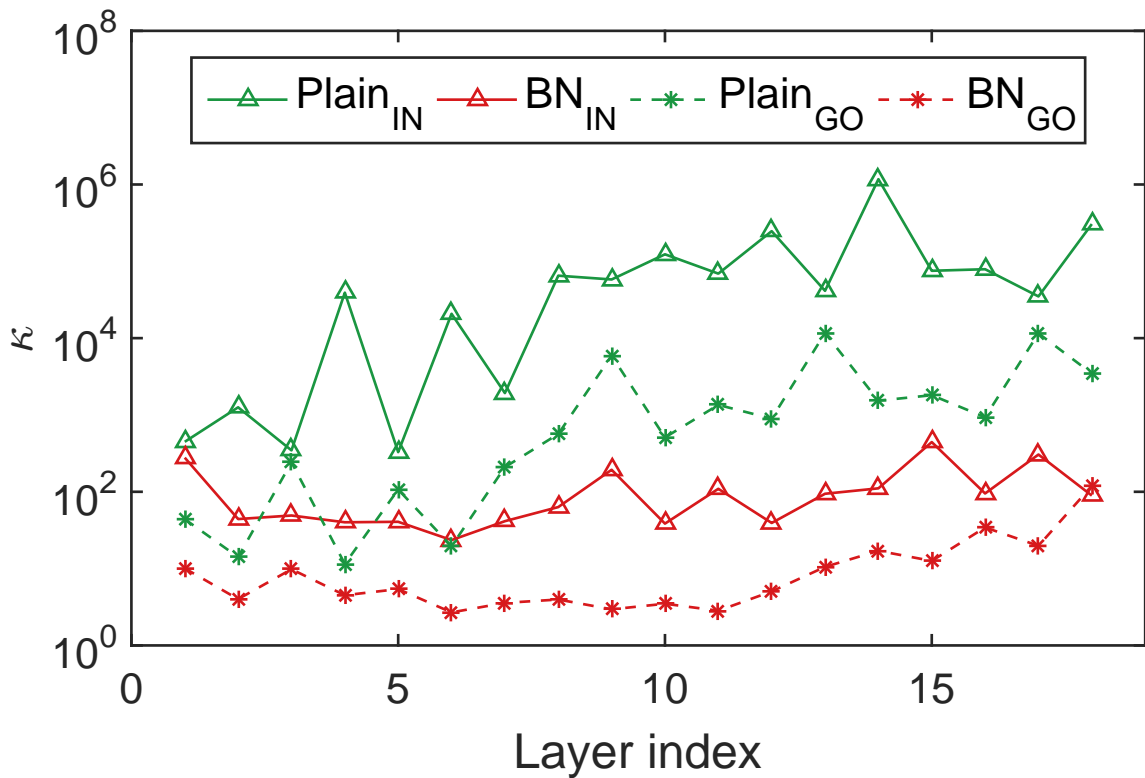

Supplement: Supplementary file 140 [file 123470375-supp.zip]

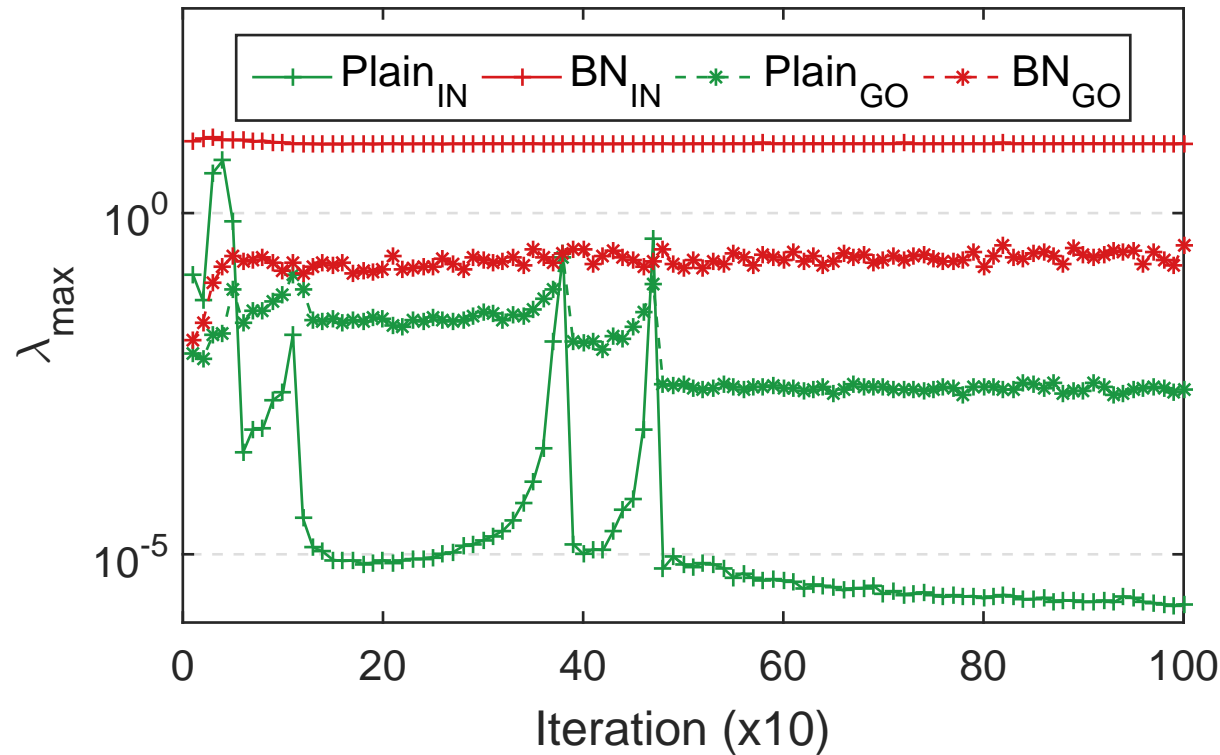

Supplement: Supplementary file 141 [file 123470375-supp.zip]

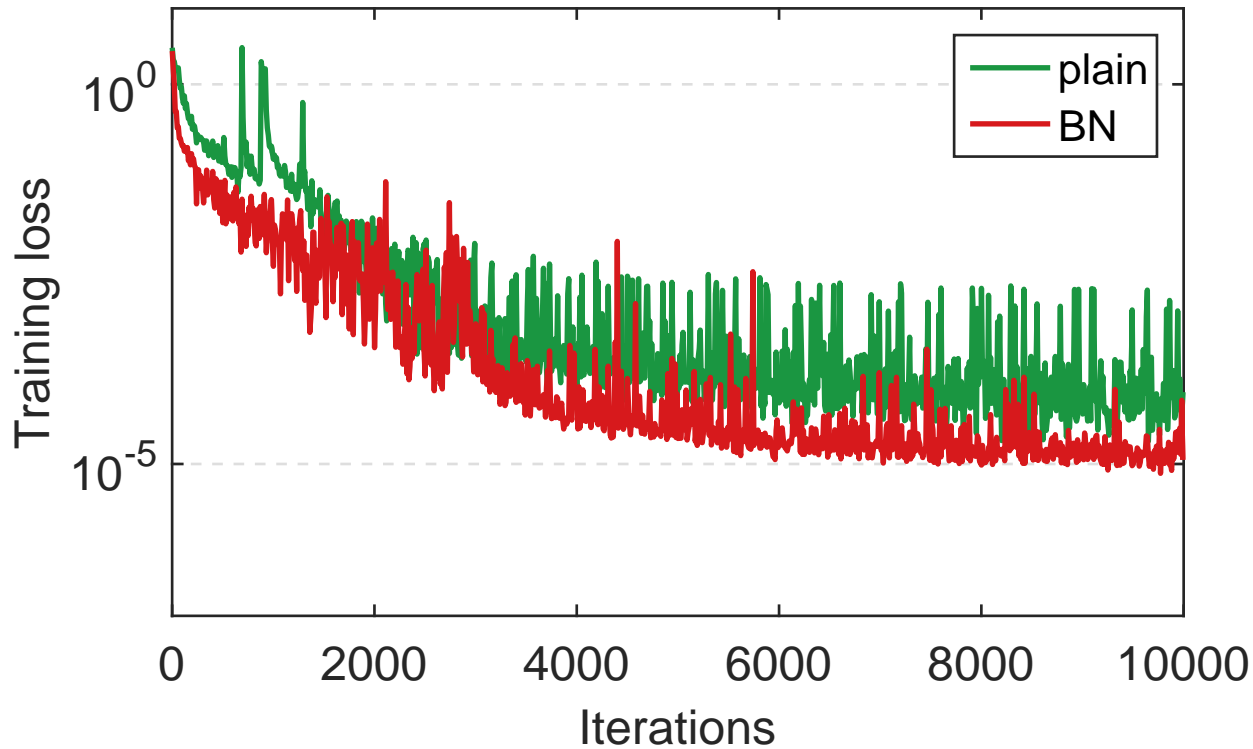

Supplement: Supplementary file 142 [file 123470375-supp.zip]

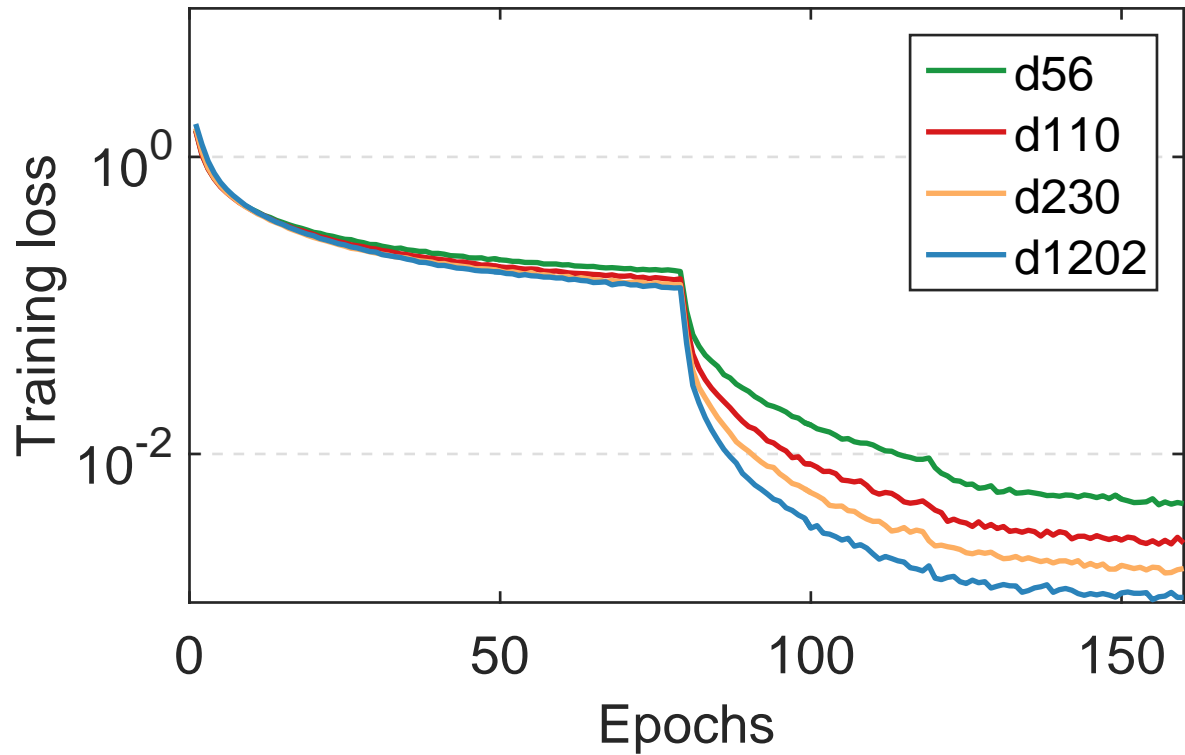

Supplement: Supplementary file 143 [file 123470375-supp.zip]

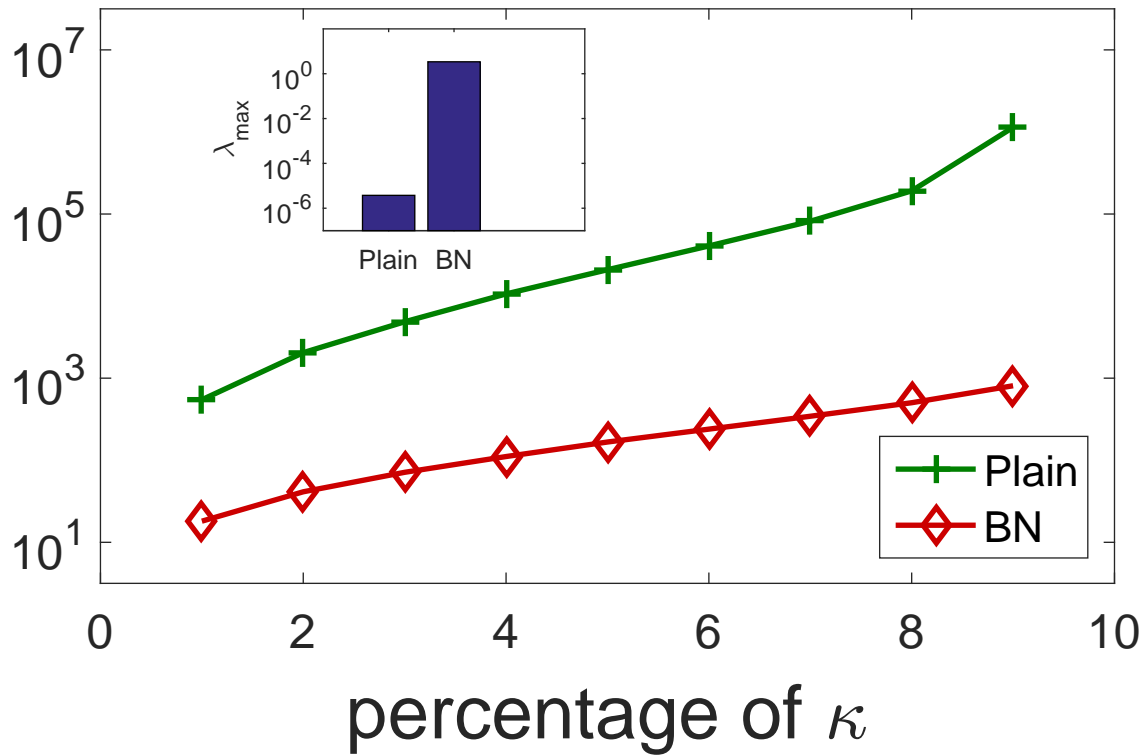

Supplement: Supplementary file 144 [file 123470375-supp.zip]

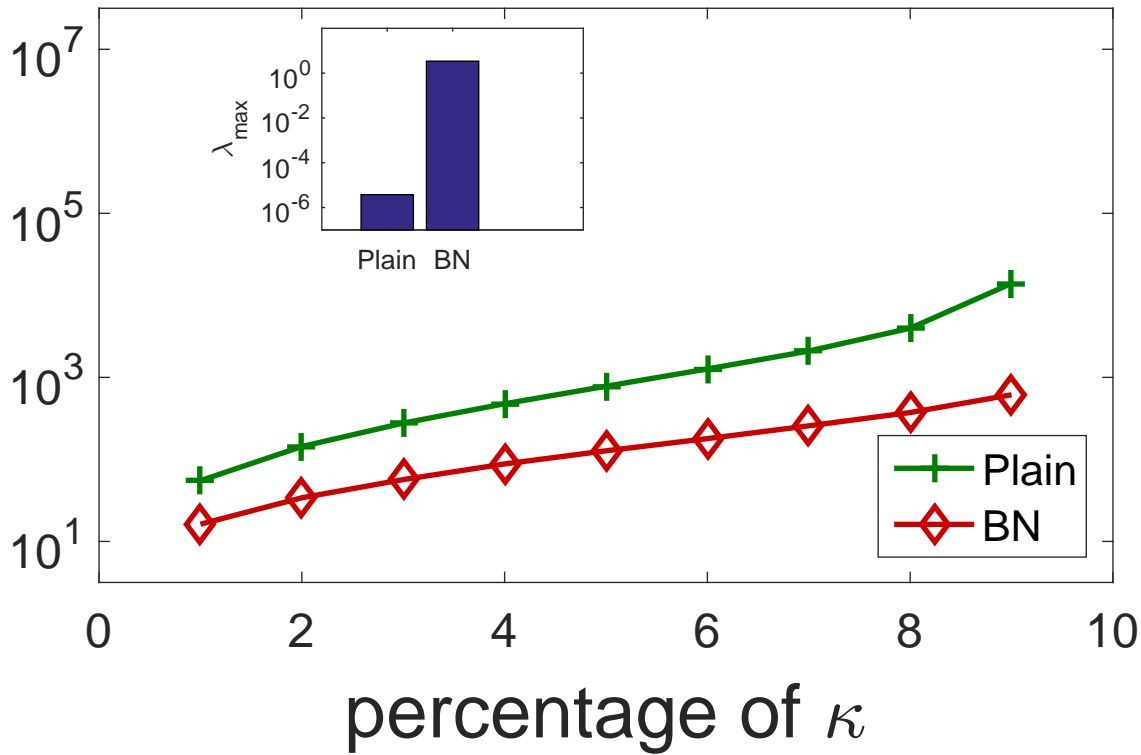

Supplement: Supplementary file 145 [file 123470375-supp.zip]

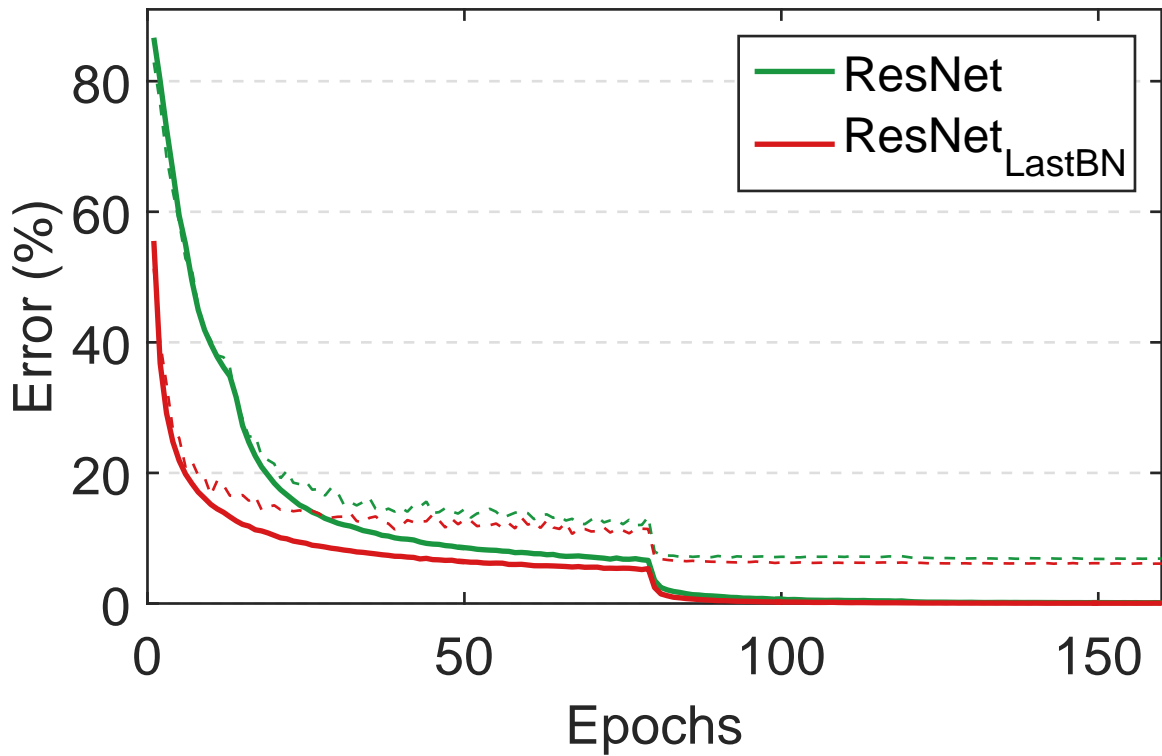

Supplement: Supplementary file 146 [file 123470375-supp.zip]

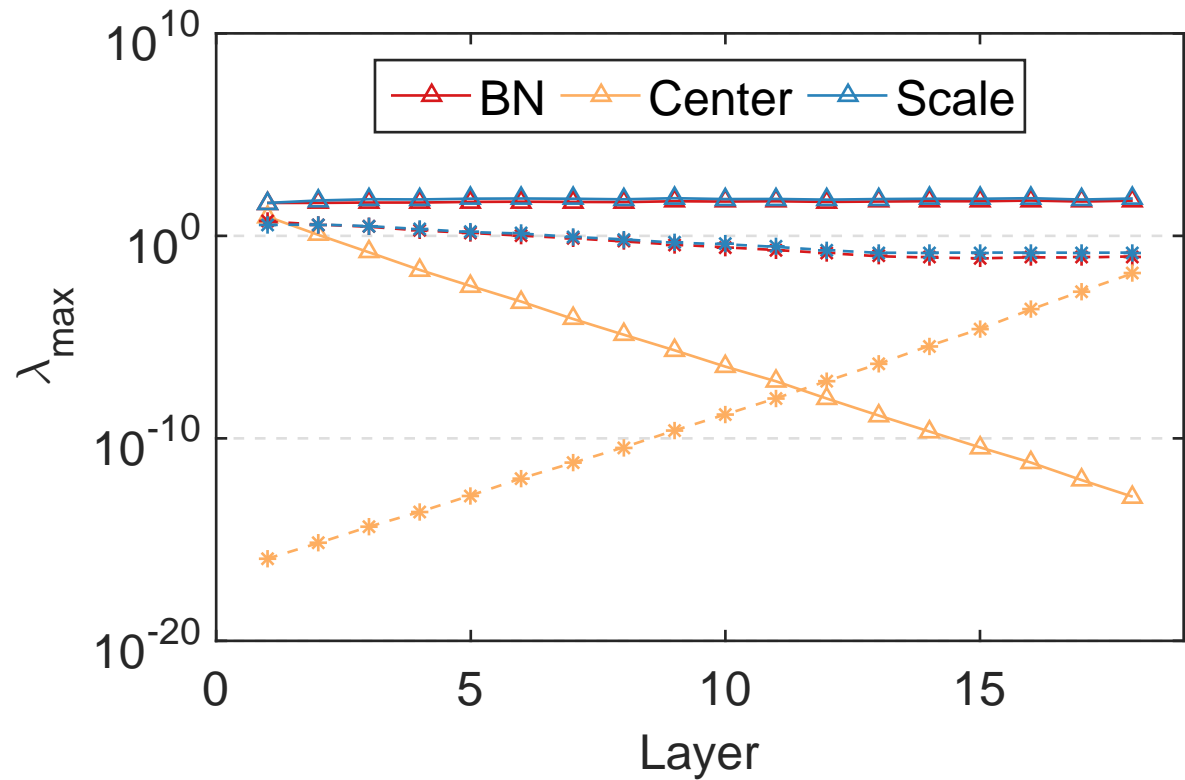

Supplement: Supplementary file 148 [file 123470375-supp.zip]

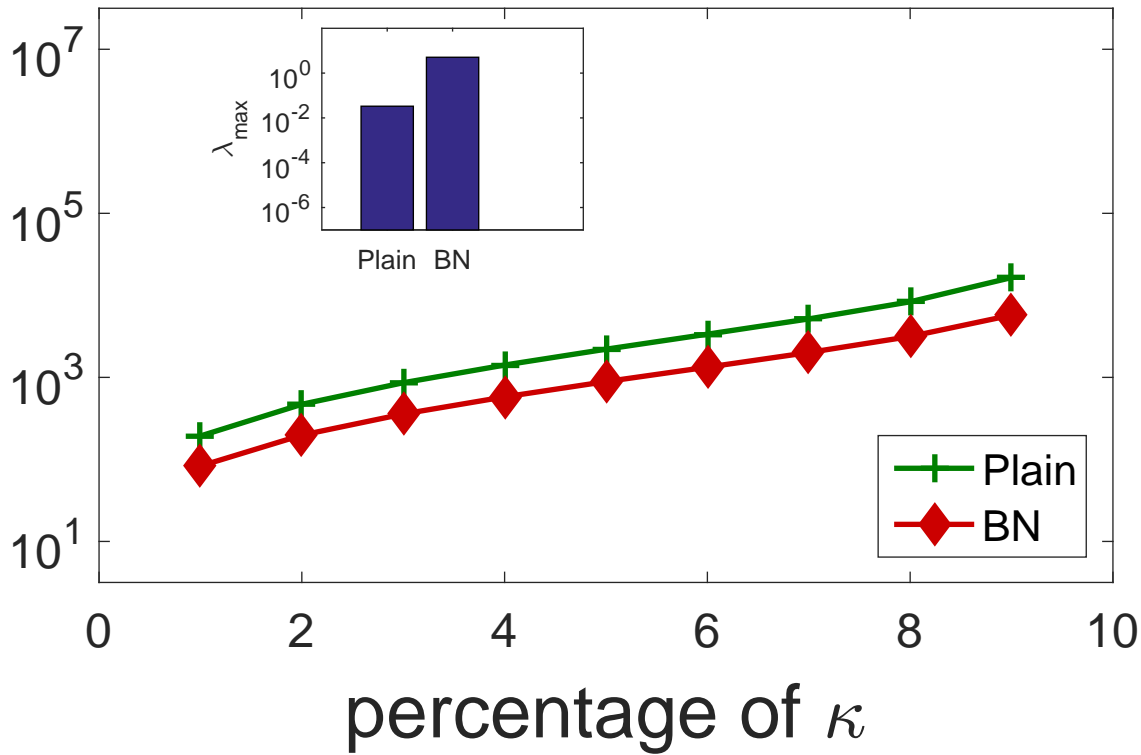

Supplement: Supplementary file 149 [file 123470375-supp.zip]

$\kappa(\text{gradOutput})$

$10^{60}$

$10^{40}$

$10^{20}$

$10^0$

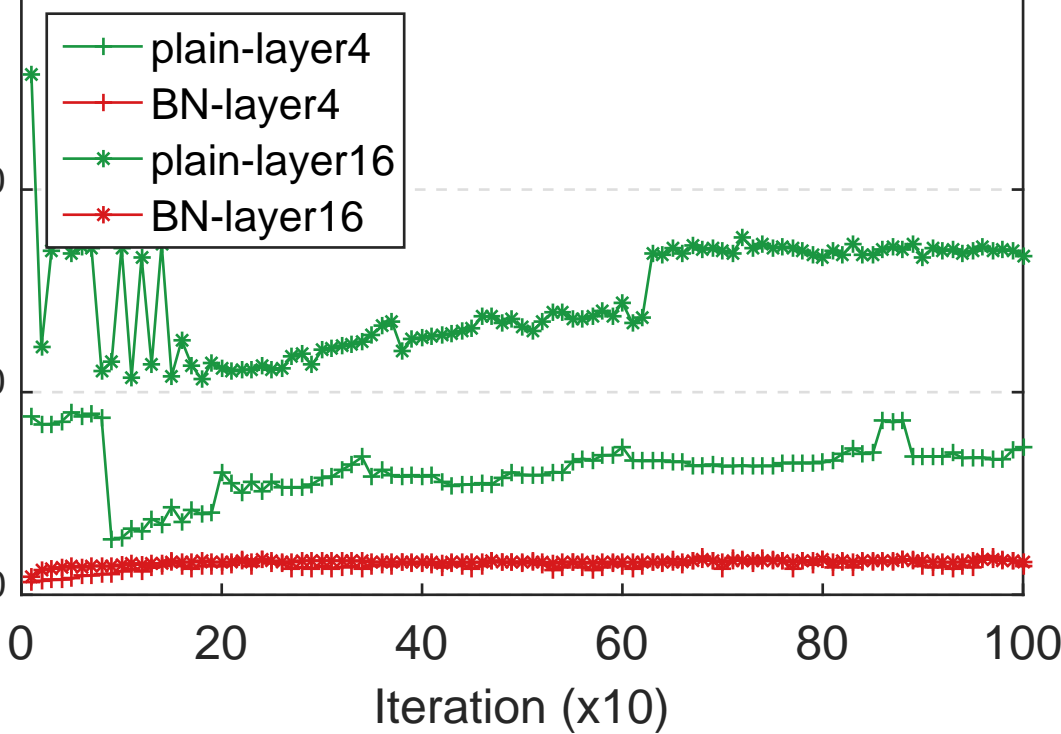

Supplement: Supplementary file 150 [file 123470375-supp.zip]

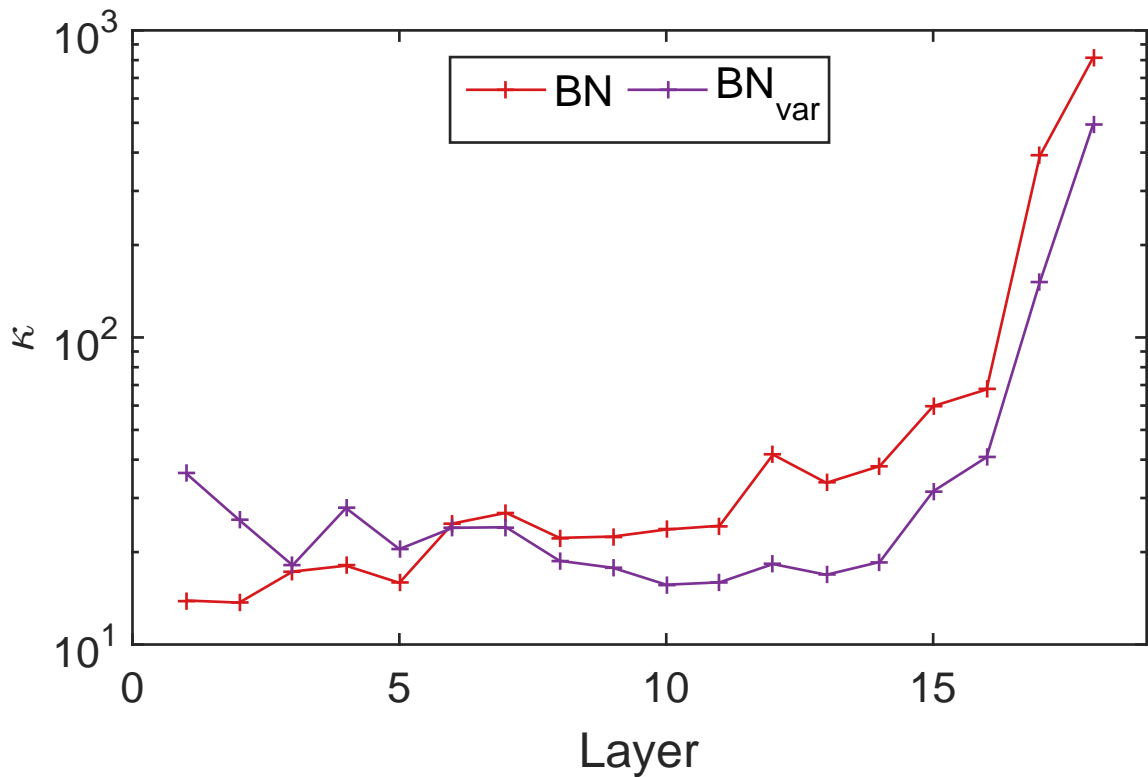

Supplement: Supplementary file 151 [file 123470375-supp.zip]

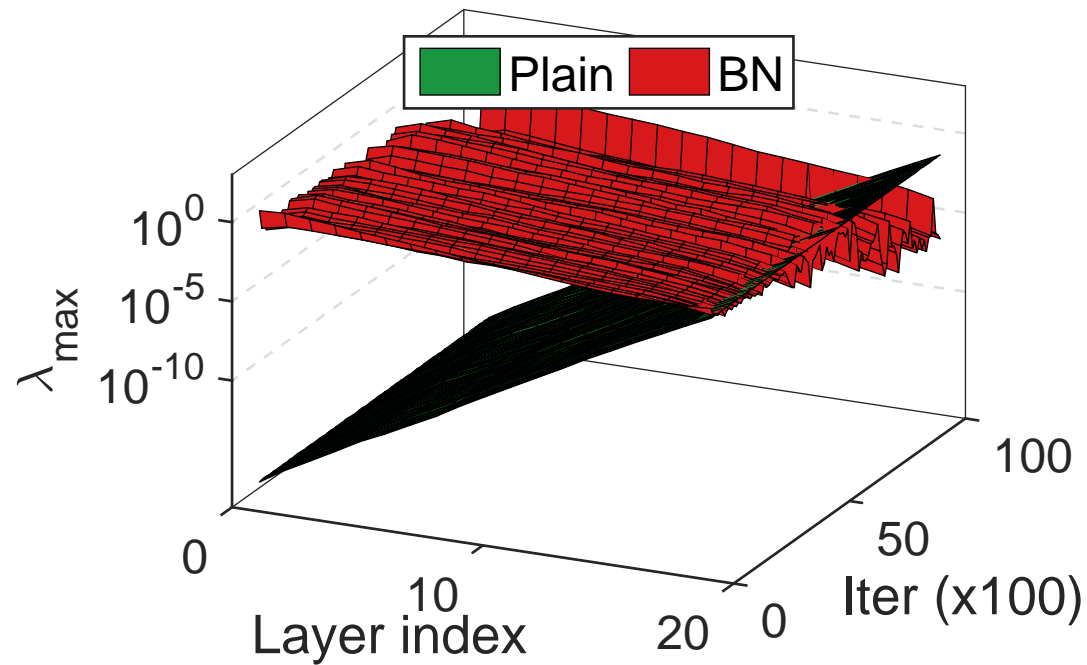

Supplement: Supplementary file 152 [file 123470375-supp.zip]

Training Loss

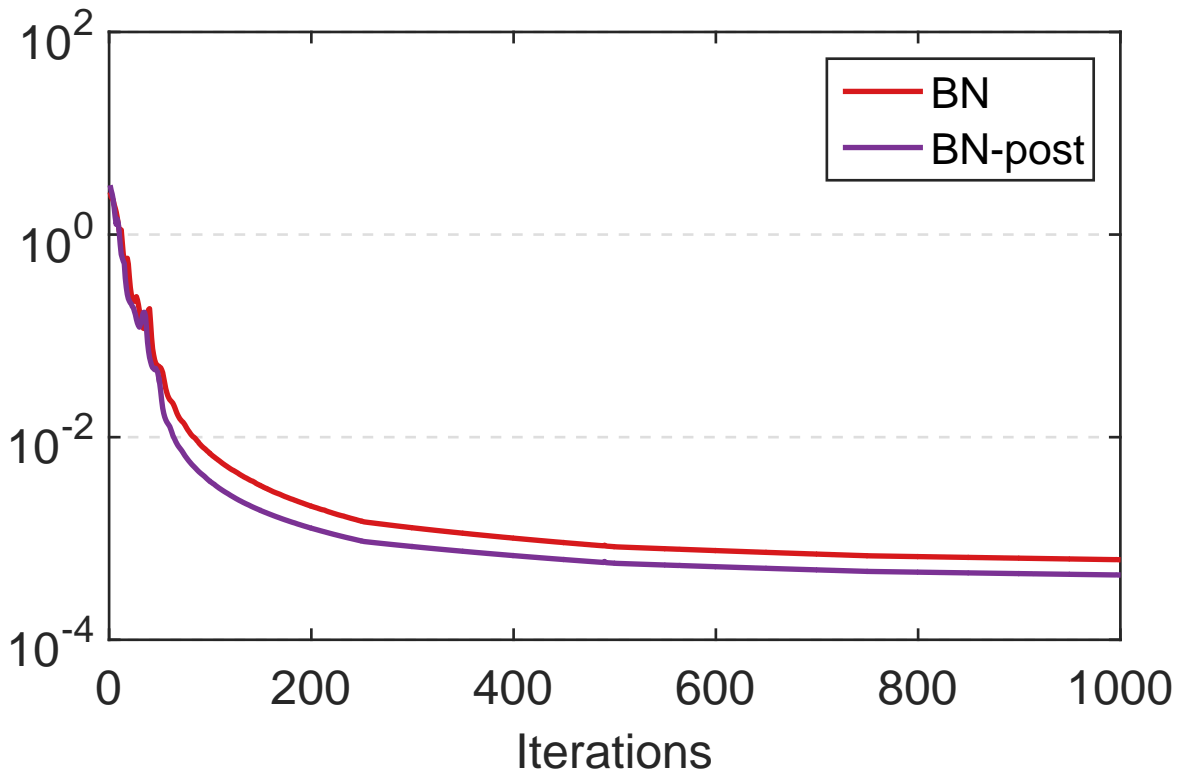

Supplement: Supplementary file 153 [file 123470375-supp.zip]

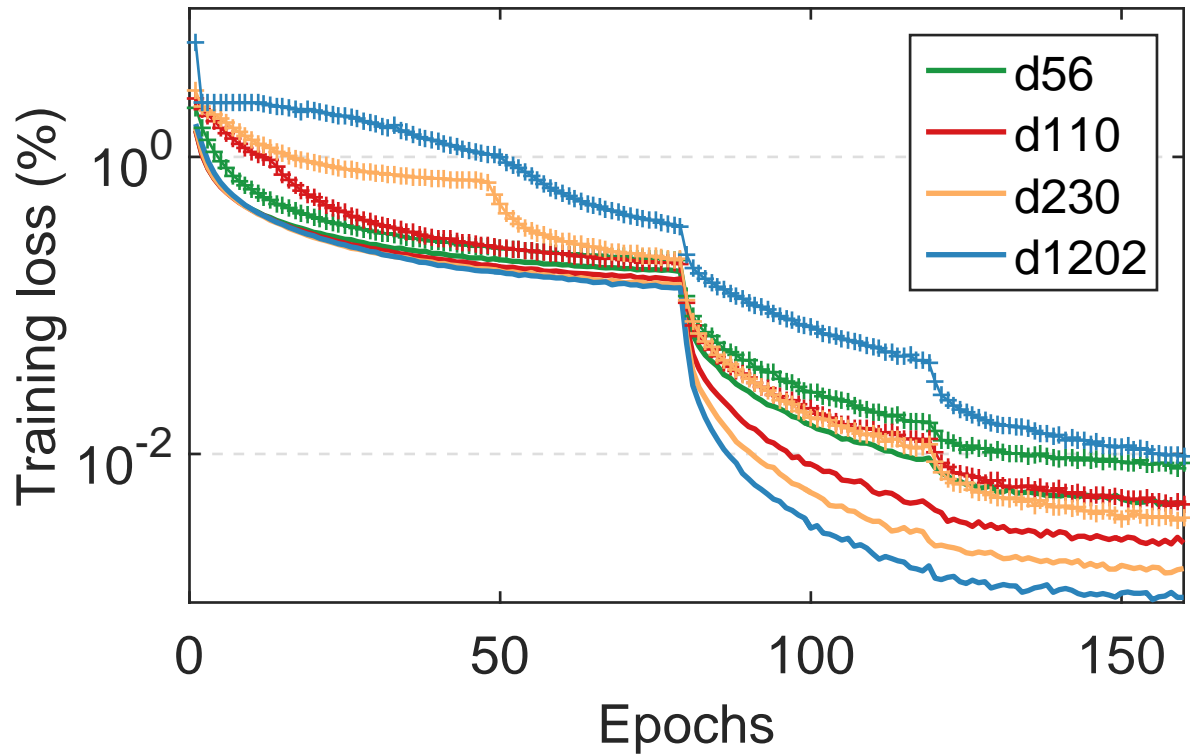

Supplement: Supplementary file 154 [file 123470375-supp.zip]

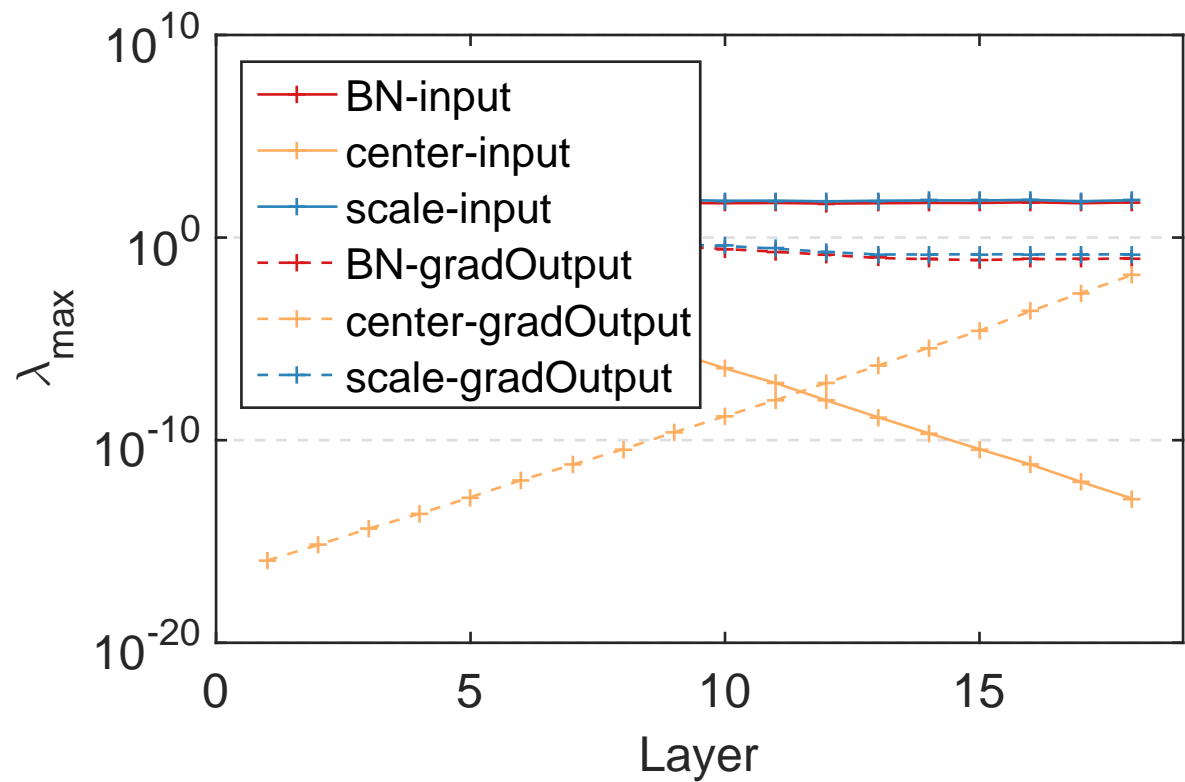

Supplement: Supplementary file 155 [file 123470375-supp.zip]

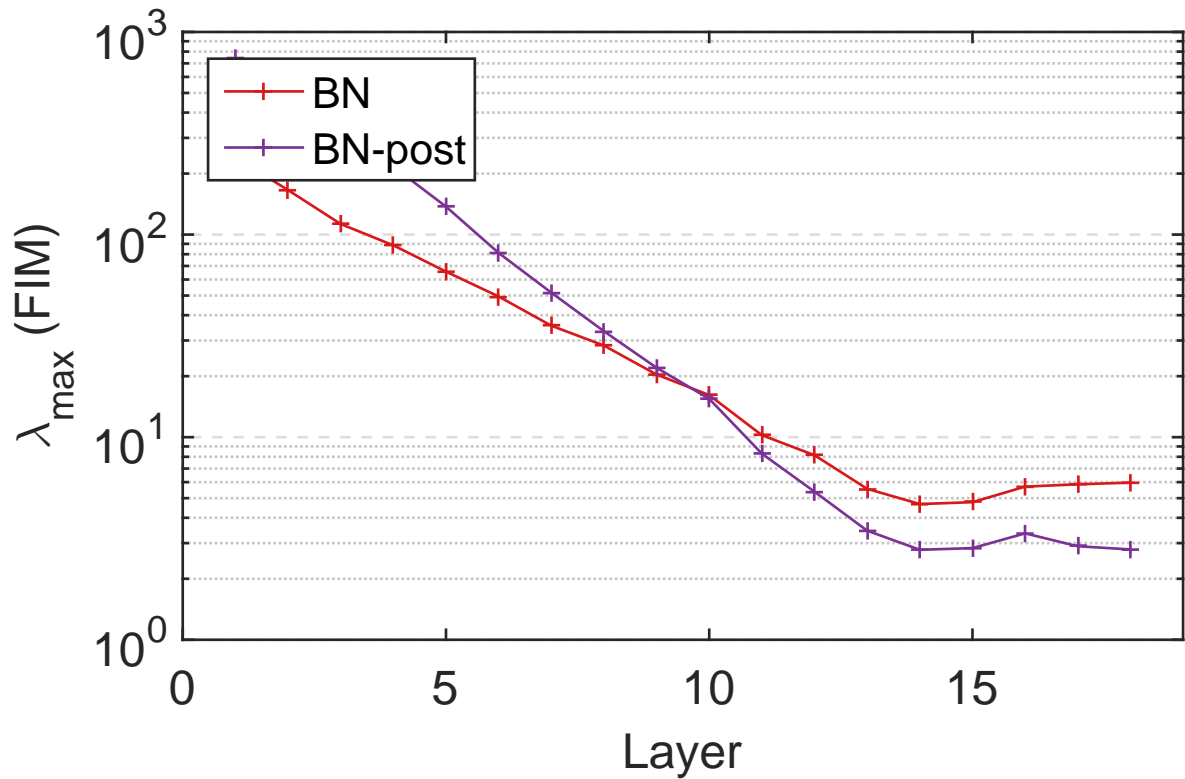

Supplement: Supplementary file 156 [file 123470375-supp.zip]

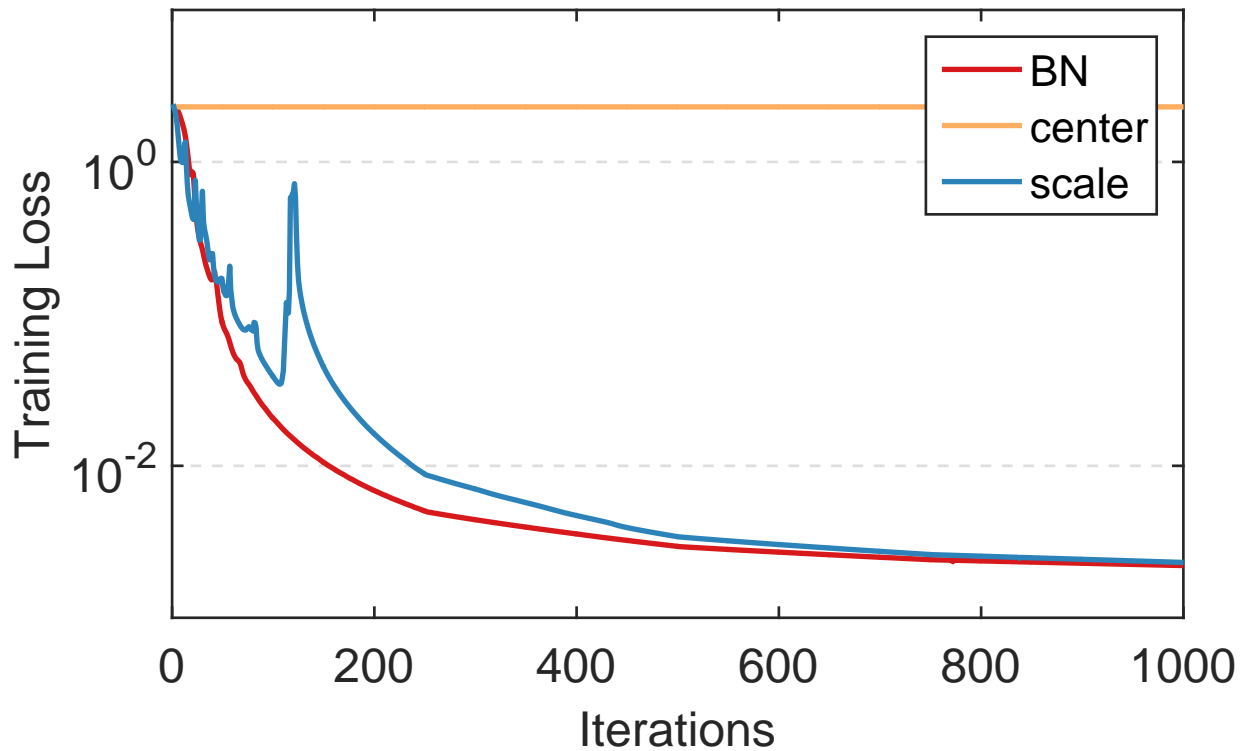

Supplement: Supplementary file 157 [file 123470375-supp.zip]

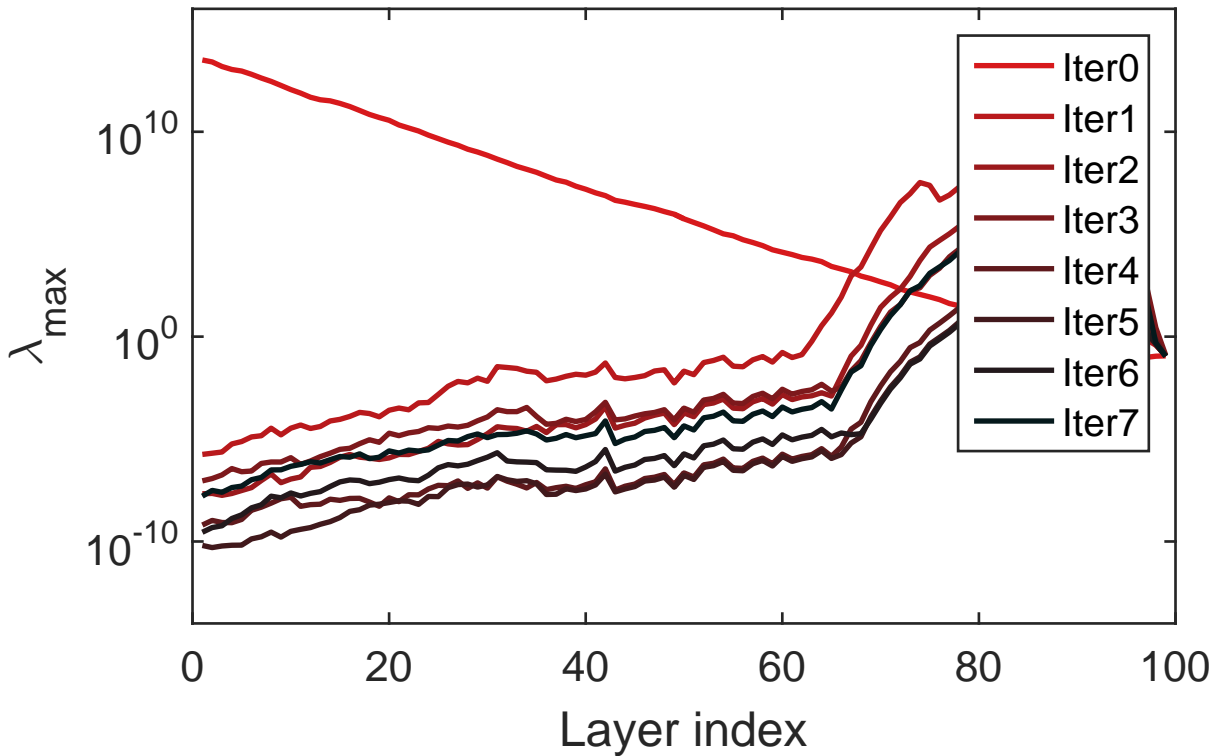

Supplement: Supplementary file 158 [file 123470375-supp.zip]

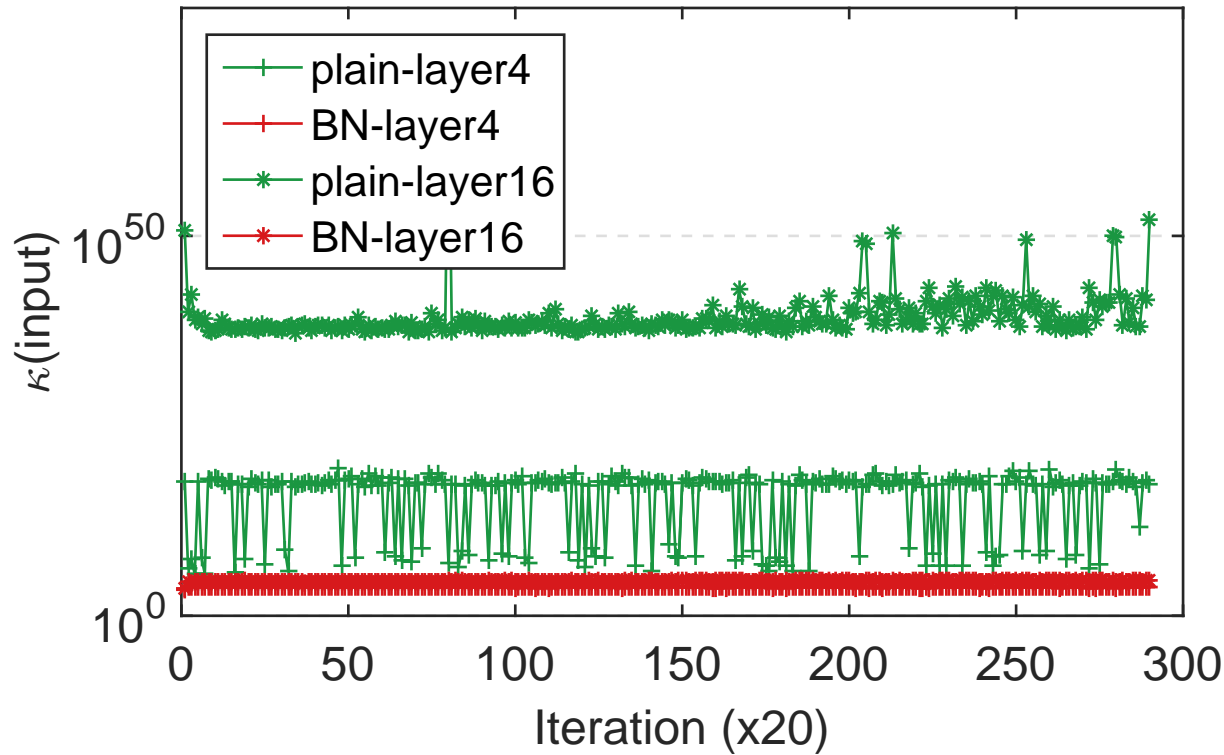

Supplement: Supplementary file 159 [file 123470375-supp.zip]

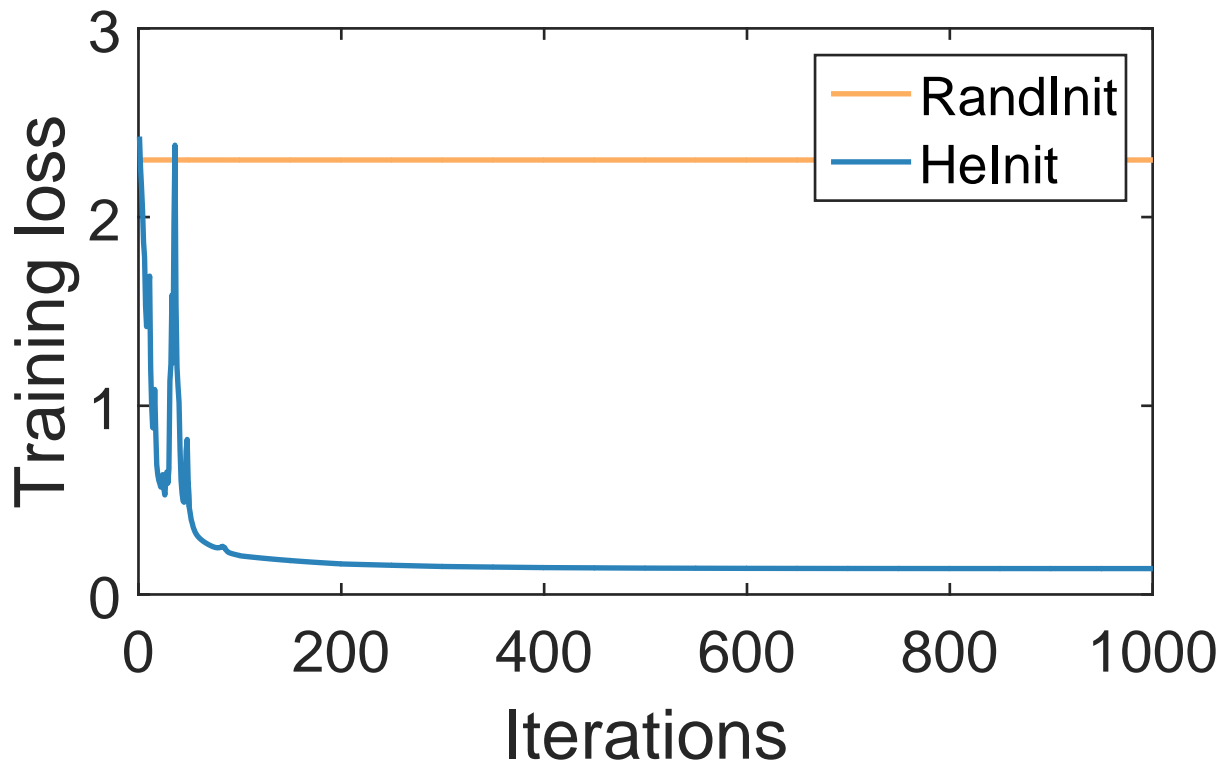

Supplement: Supplementary file 160 [file 123470375-supp.zip]

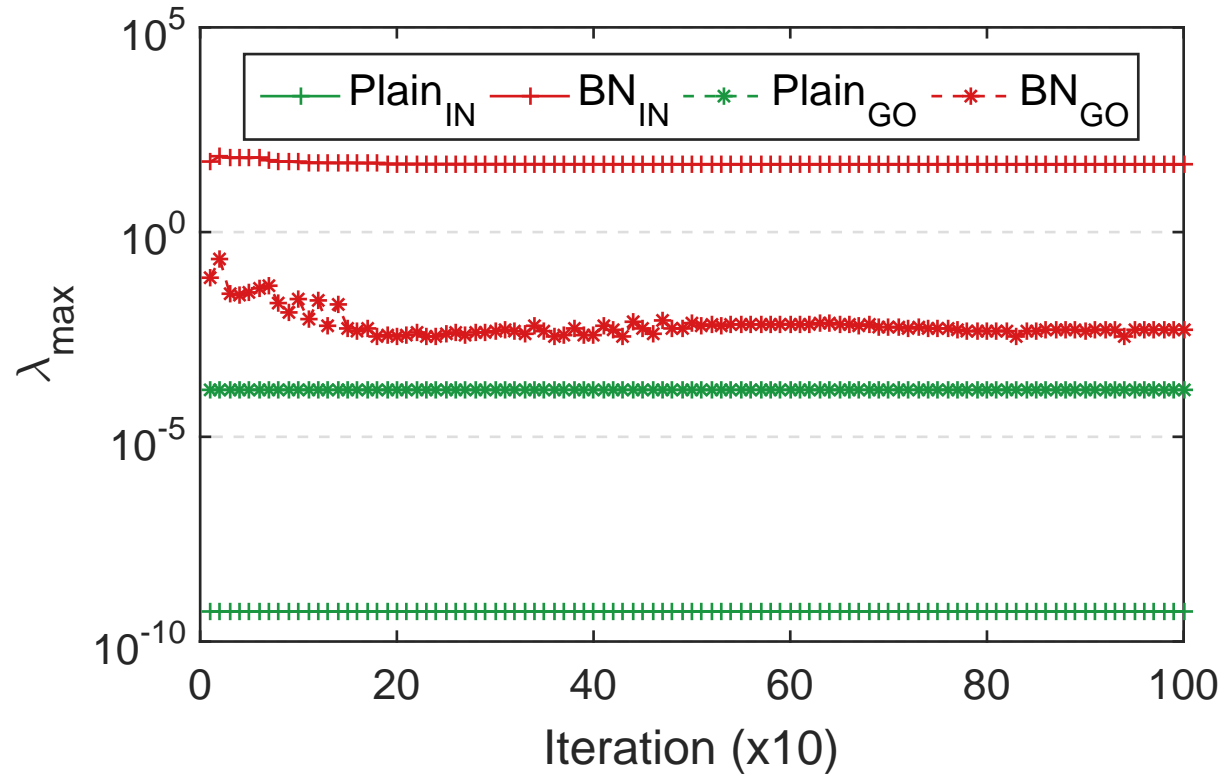

Supplement: Supplementary file 161 [file 123470375-supp.zip]

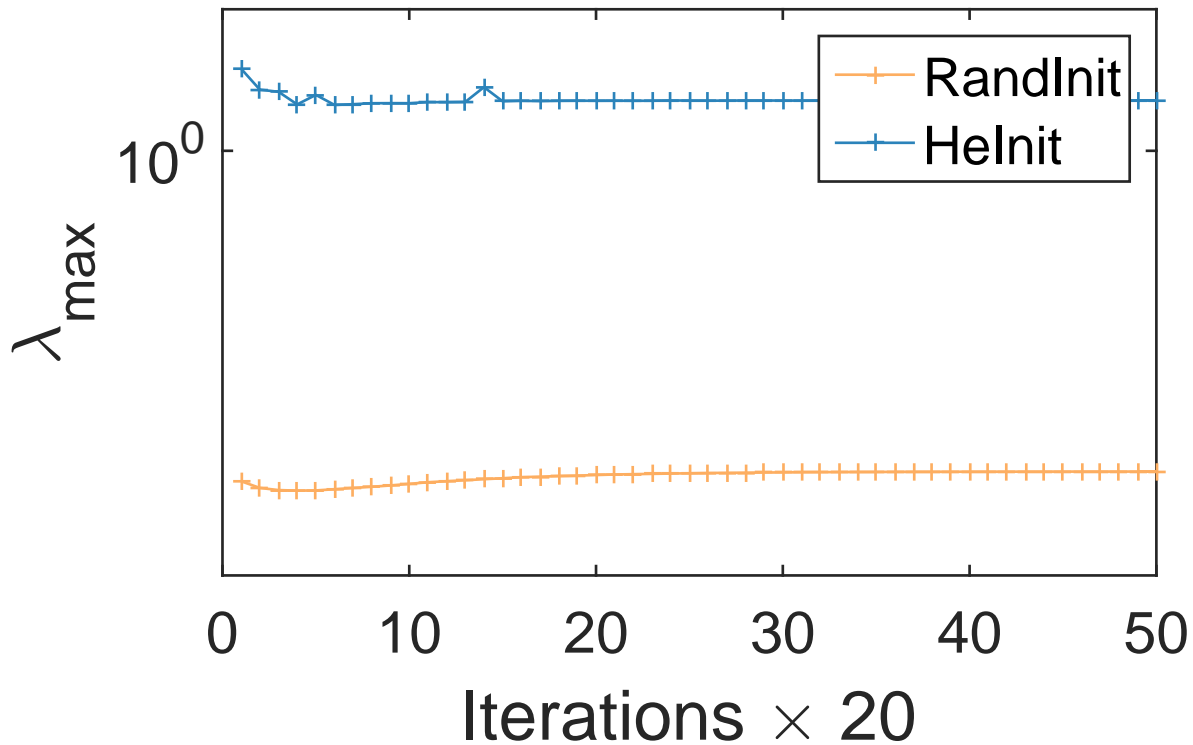

Supplement: Supplementary file 162 [file 123470375-supp.zip]

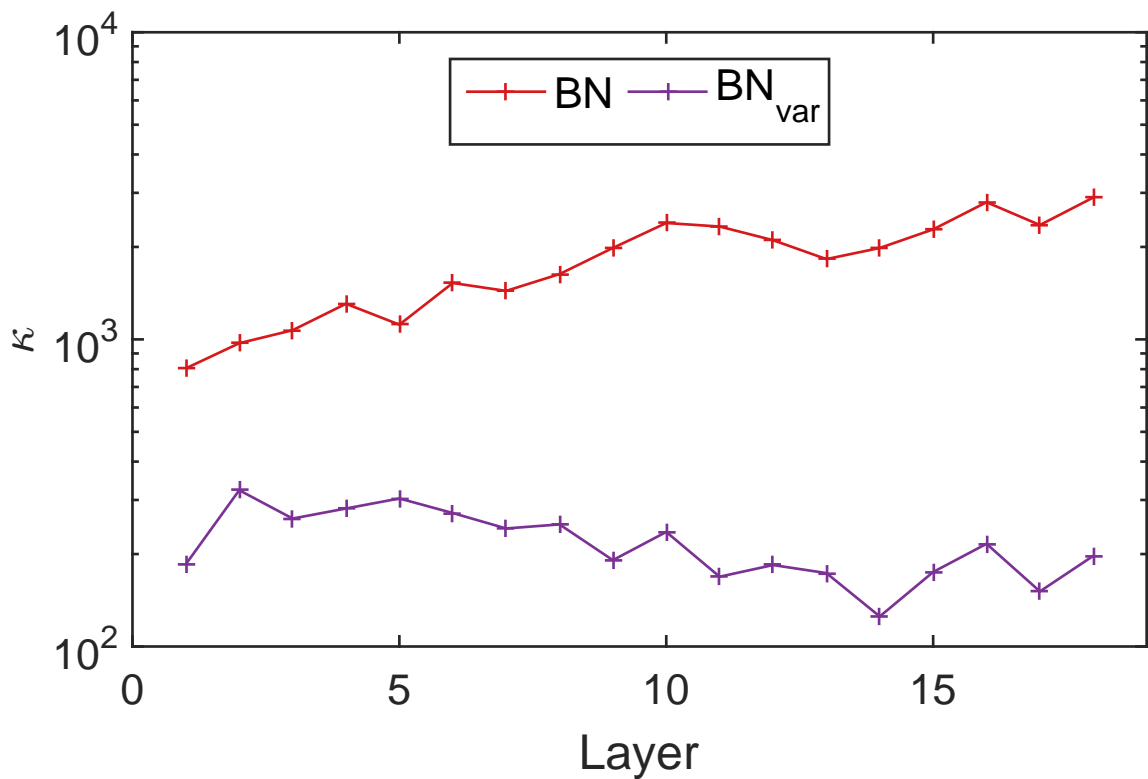

Supplement: Supplementary file 163 [file 123470375-supp.zip]

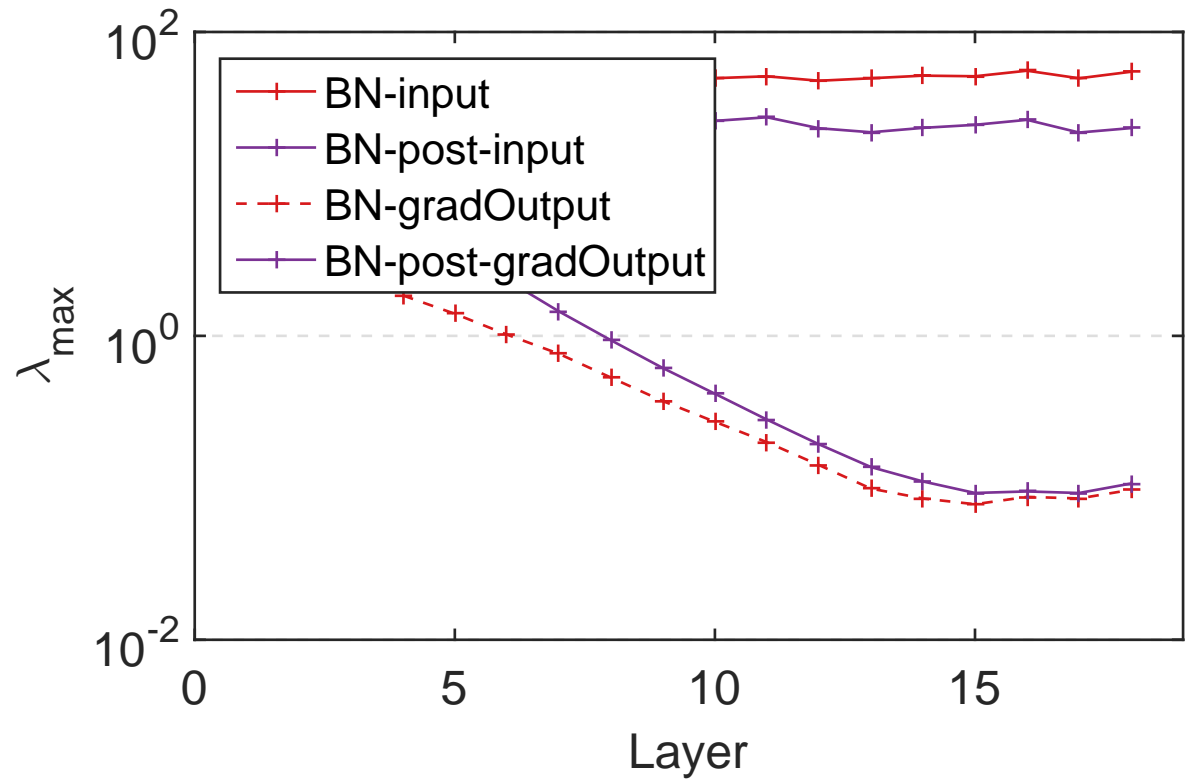

Supplement: Supplementary file 164 [file 123470375-supp.zip]

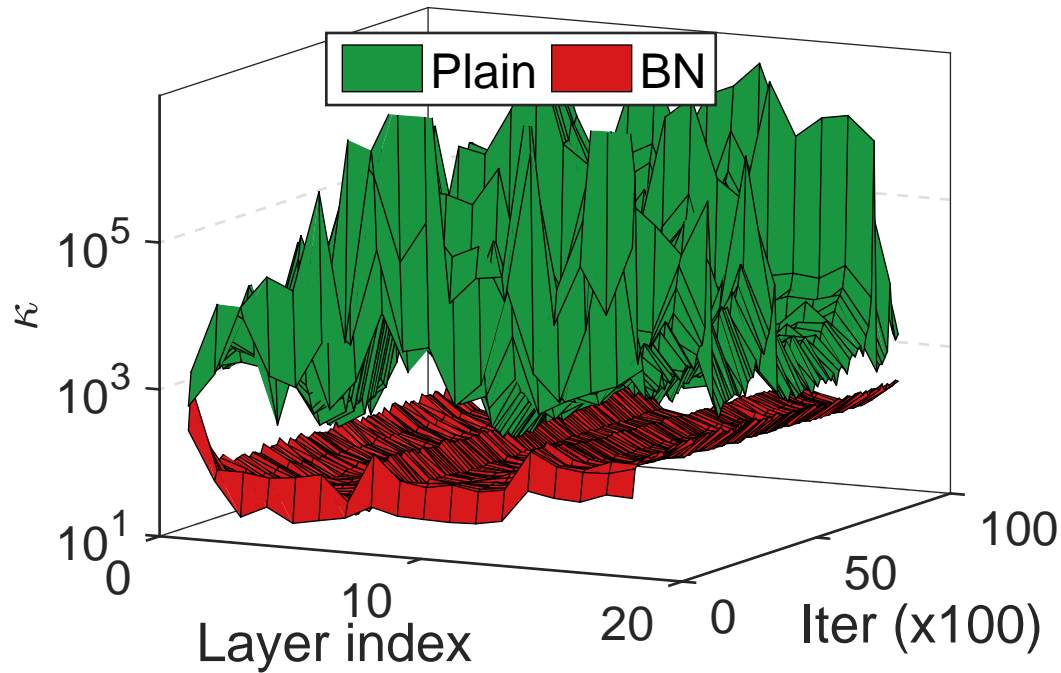

Supplement: Supplementary file 165 [file 123470375-supp.zip]

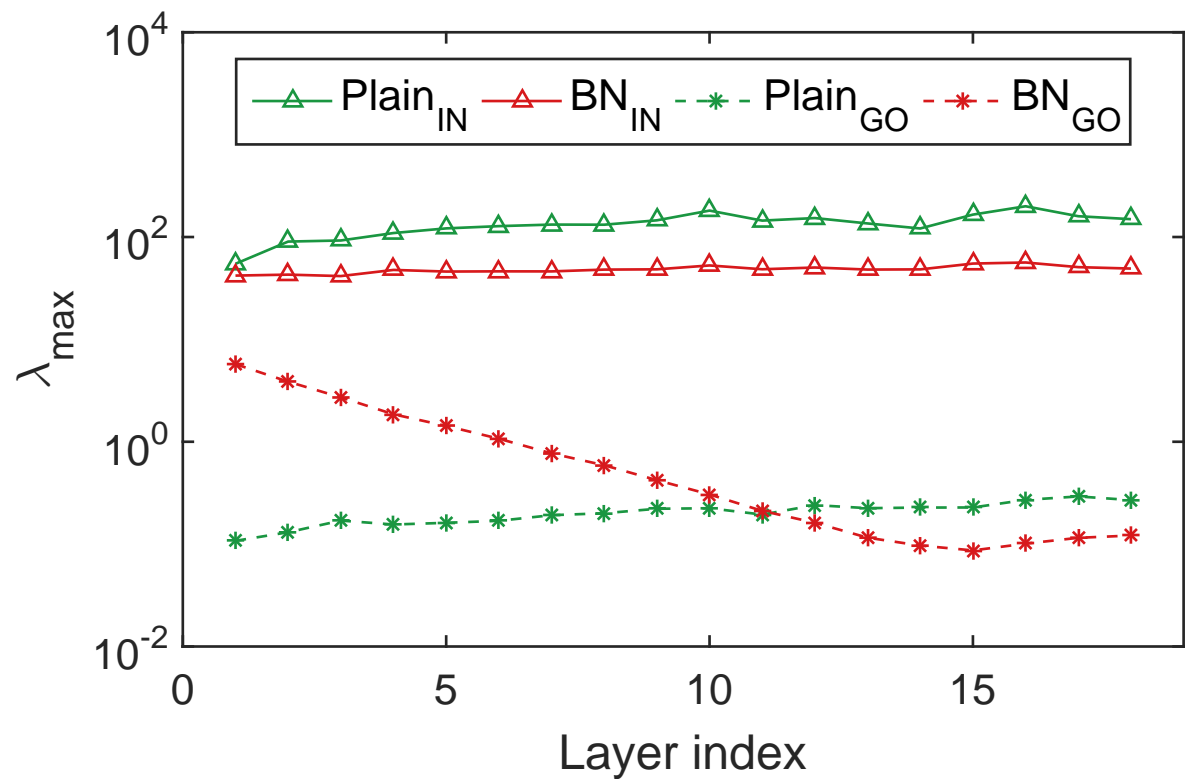

Supplement: Supplementary file 166 [file 123470375-supp.zip]

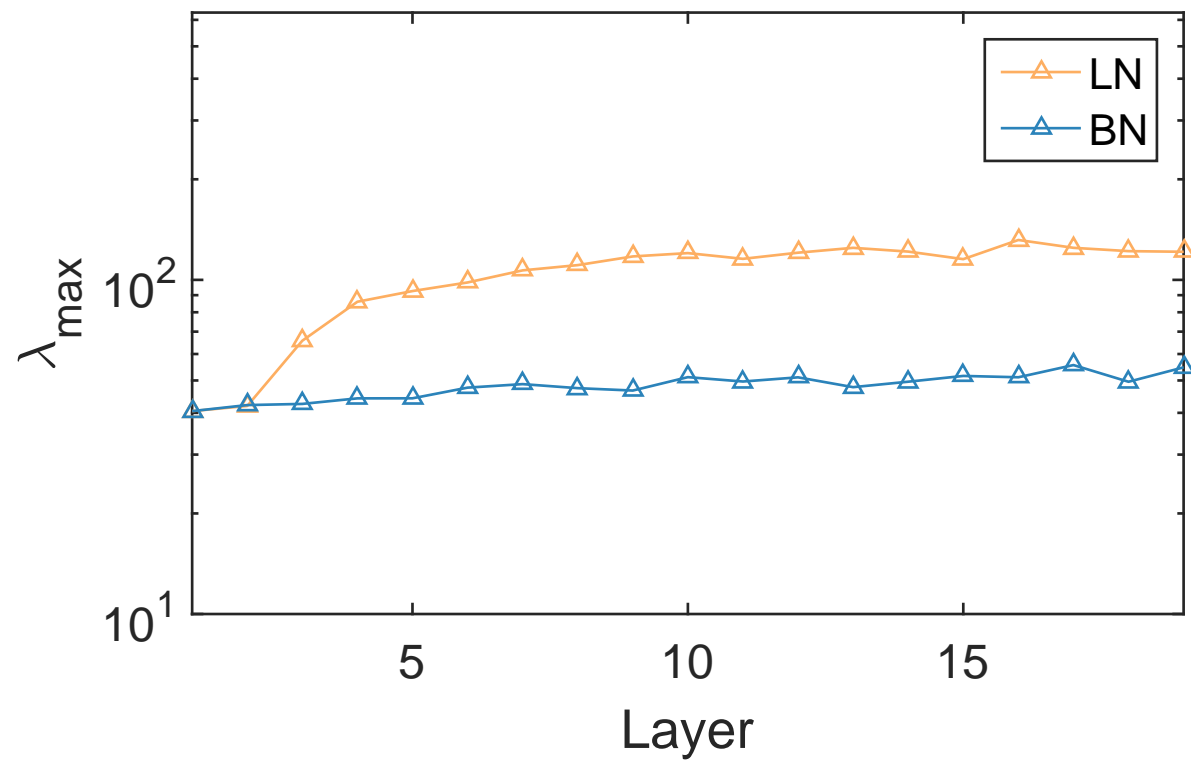

Supplement: Supplementary file 167 [file 123470375-supp.zip]

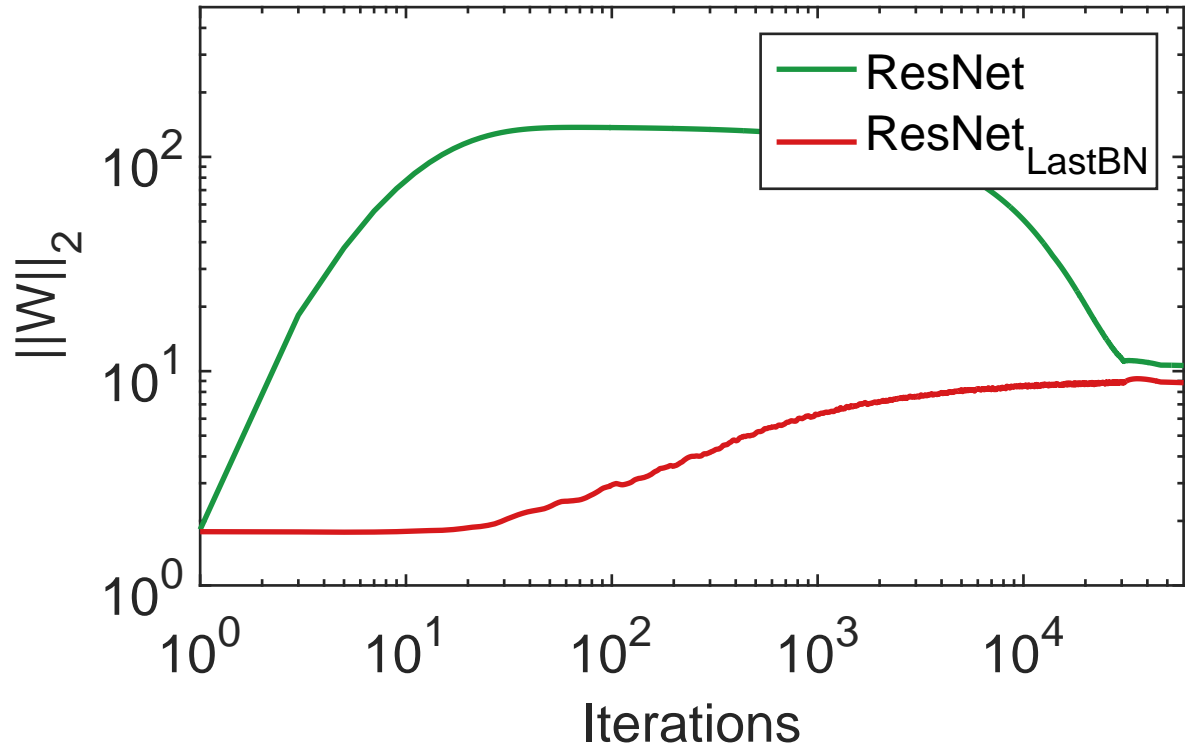

Supplement: Supplementary file 168 [file 123470375-supp.zip]

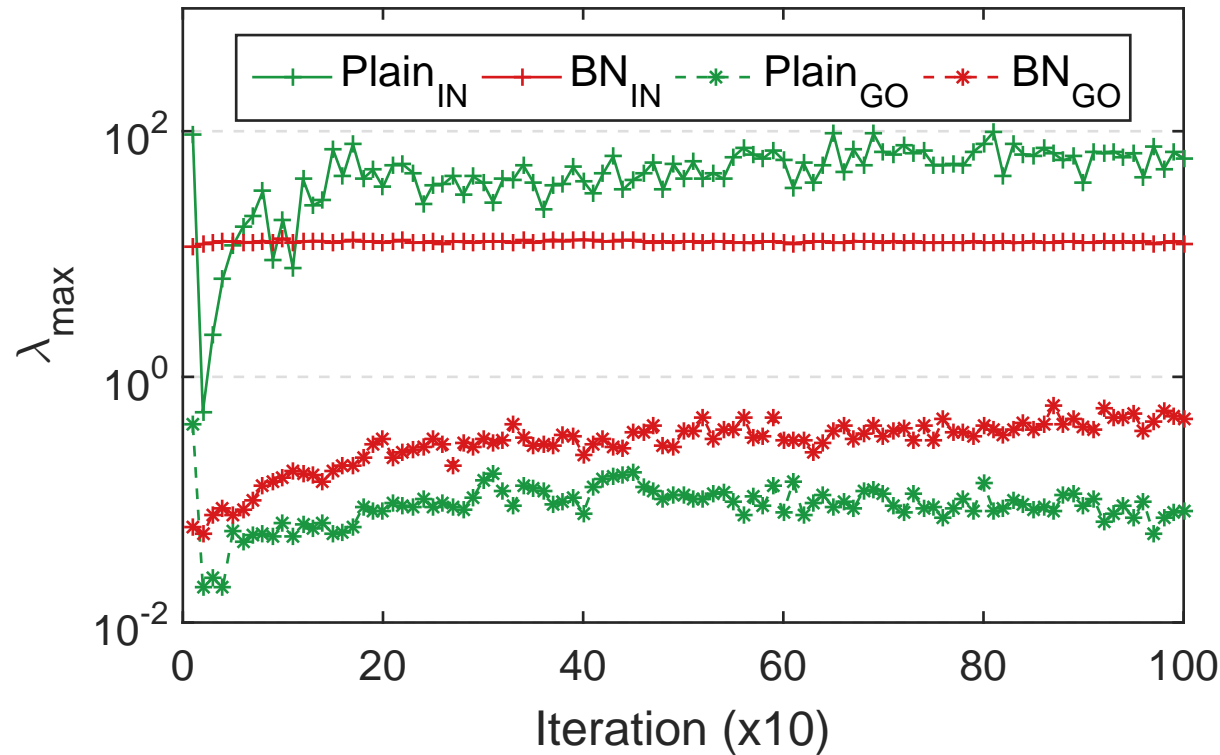

Supplement: Supplementary file 169 [file 123470375-supp.zip]

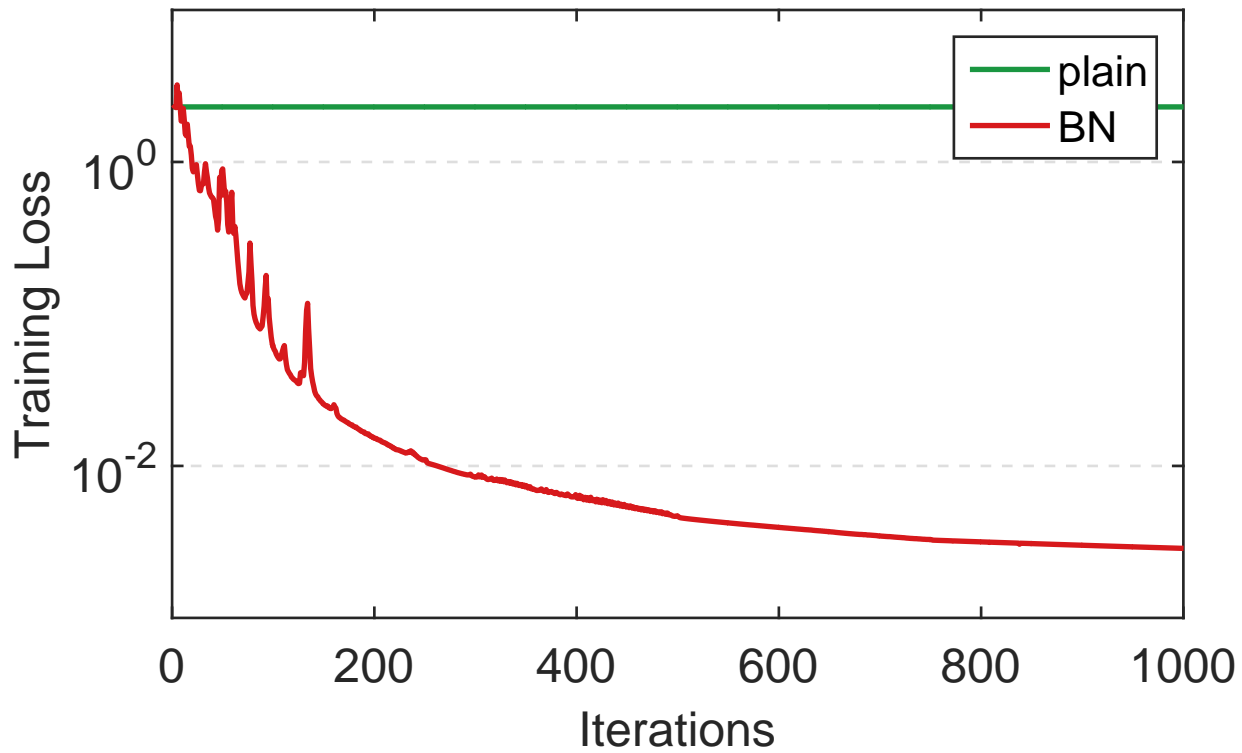

Supplement: Supplementary file 170 [file 123470375-supp.zip]

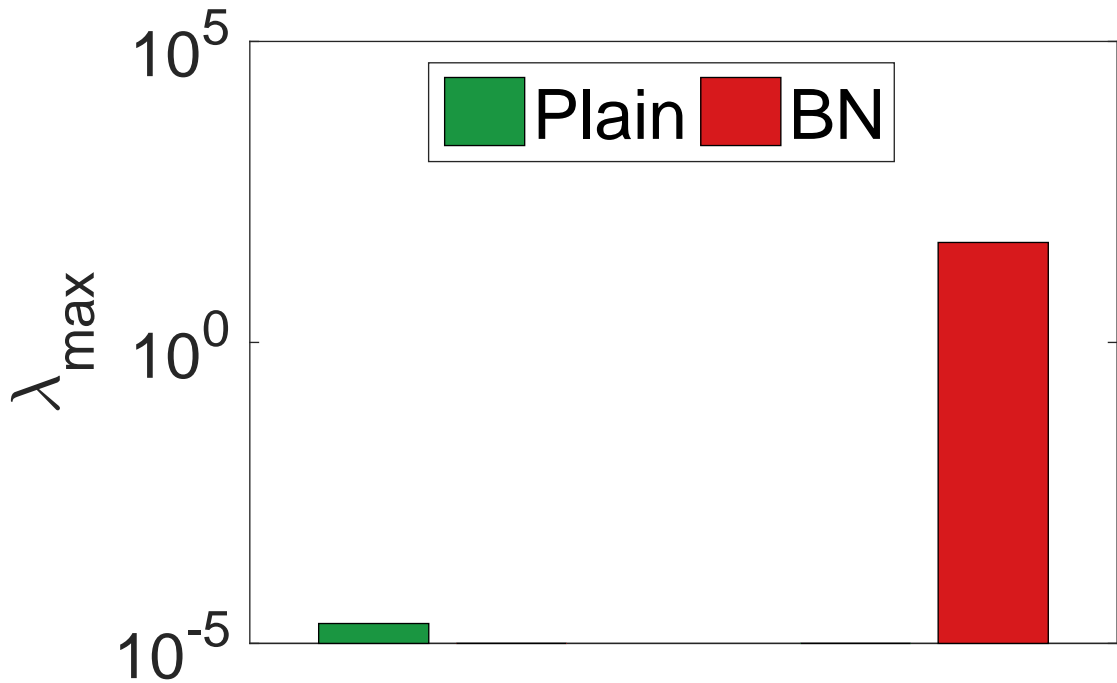

Supplement: Supplementary file 171 [file 123470375-supp.zip]

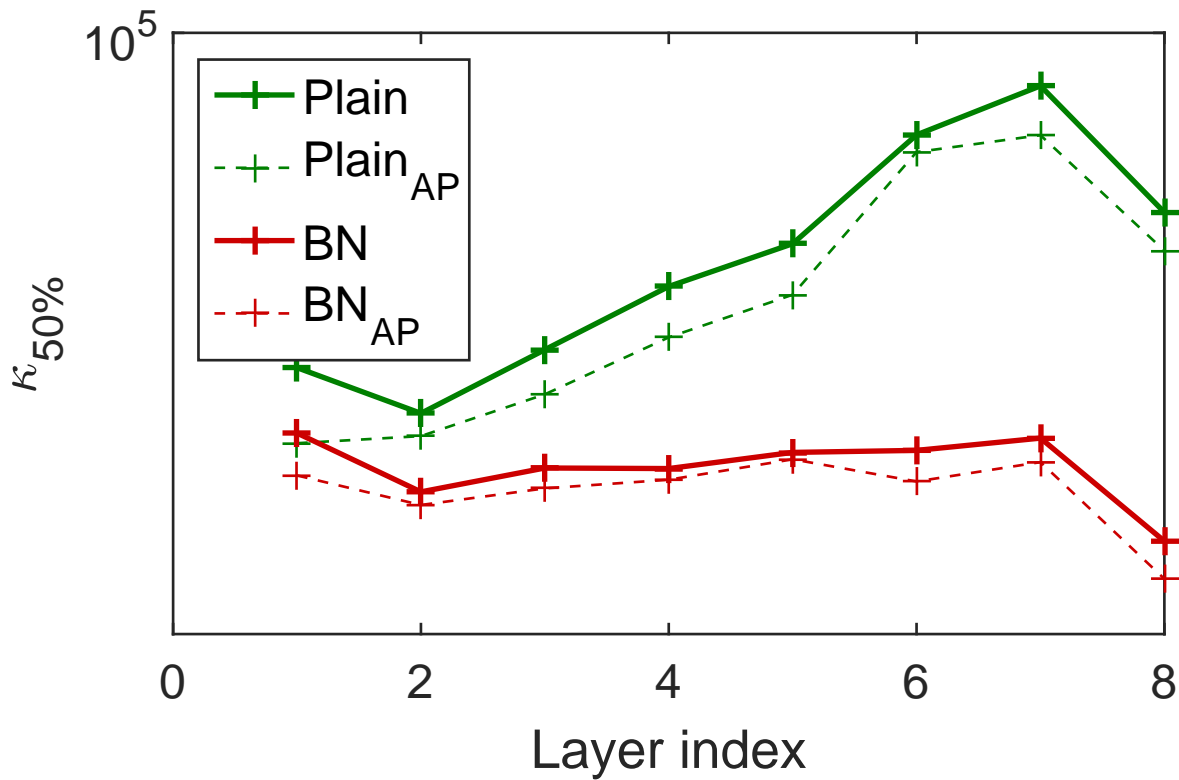

Supplement: Supplementary file 172 [file 123470375-supp.zip]

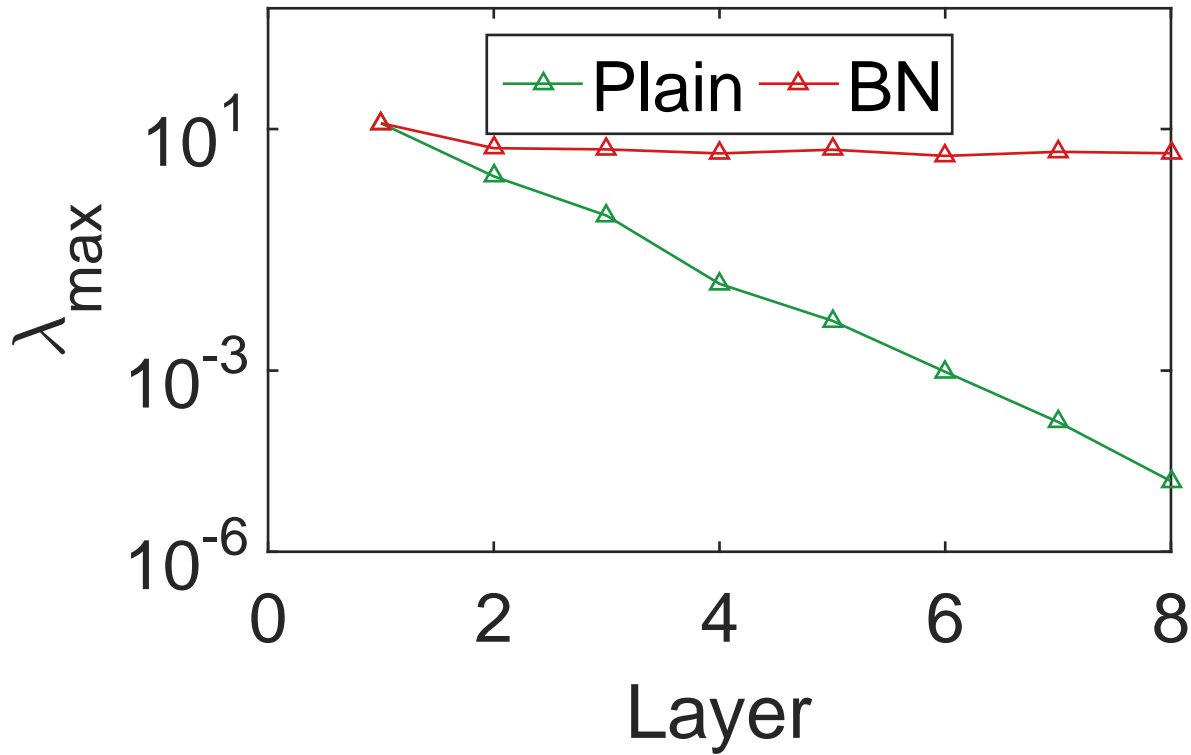

Supplement: Supplementary file 173 [file 123470375-supp.zip]

1 2 3 4 5

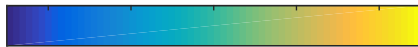

Plain

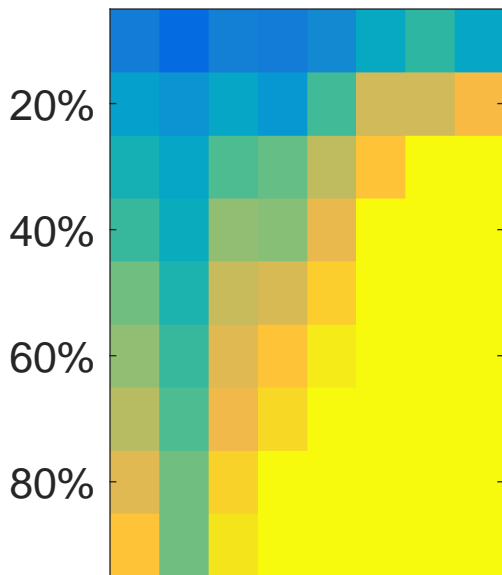

Layer

BN

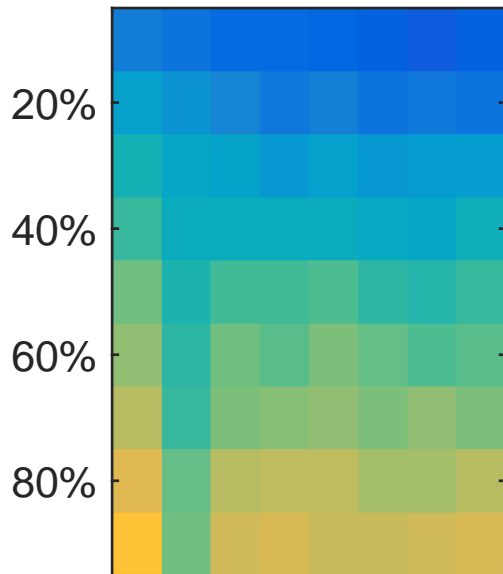

Layer

Supplement: Supplementary file 174 [file 123470375-supp.zip]

2 4 6 8 10

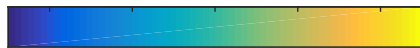

Plain

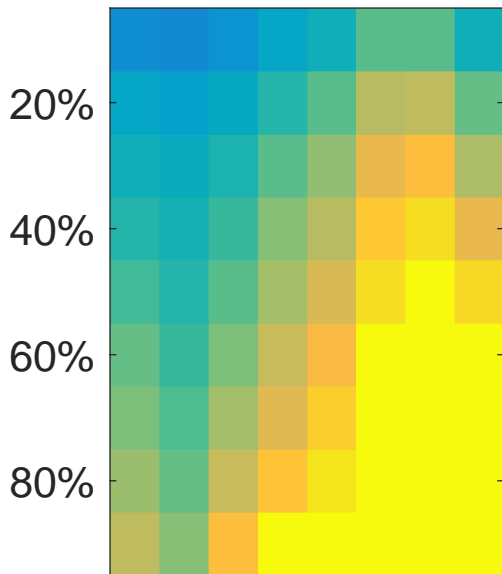

Layer

BN

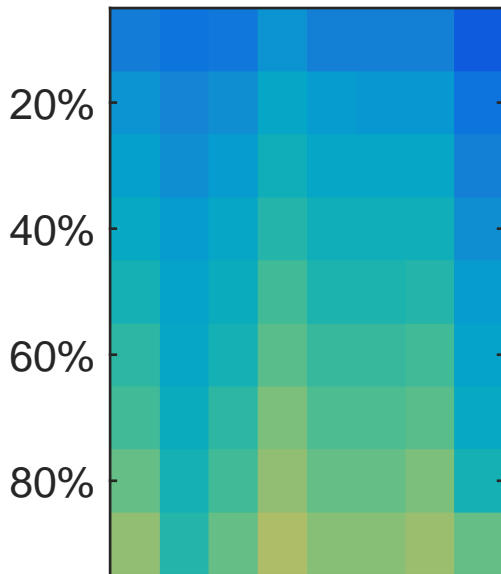

Layer

Supplement: Supplementary file 175 [file 123470375-supp.zip]

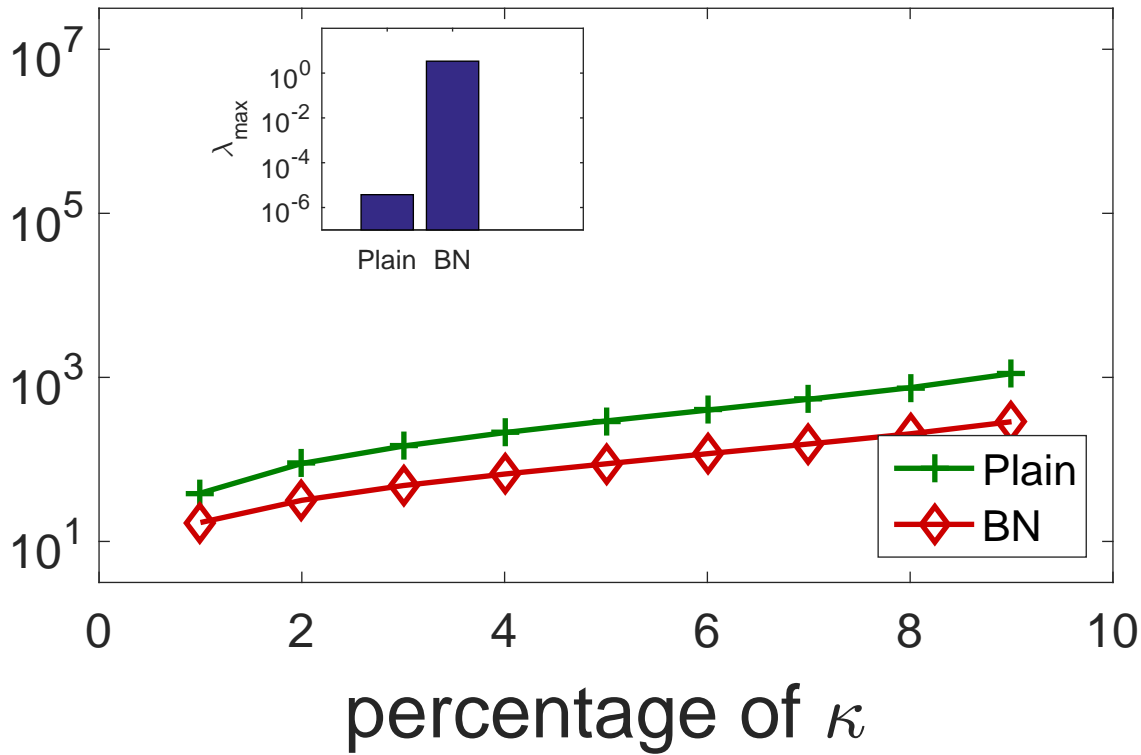

Supplement: Supplementary file 176 [file 123470375-supp.zip]

$\lambda_{\max}$  (FIM)

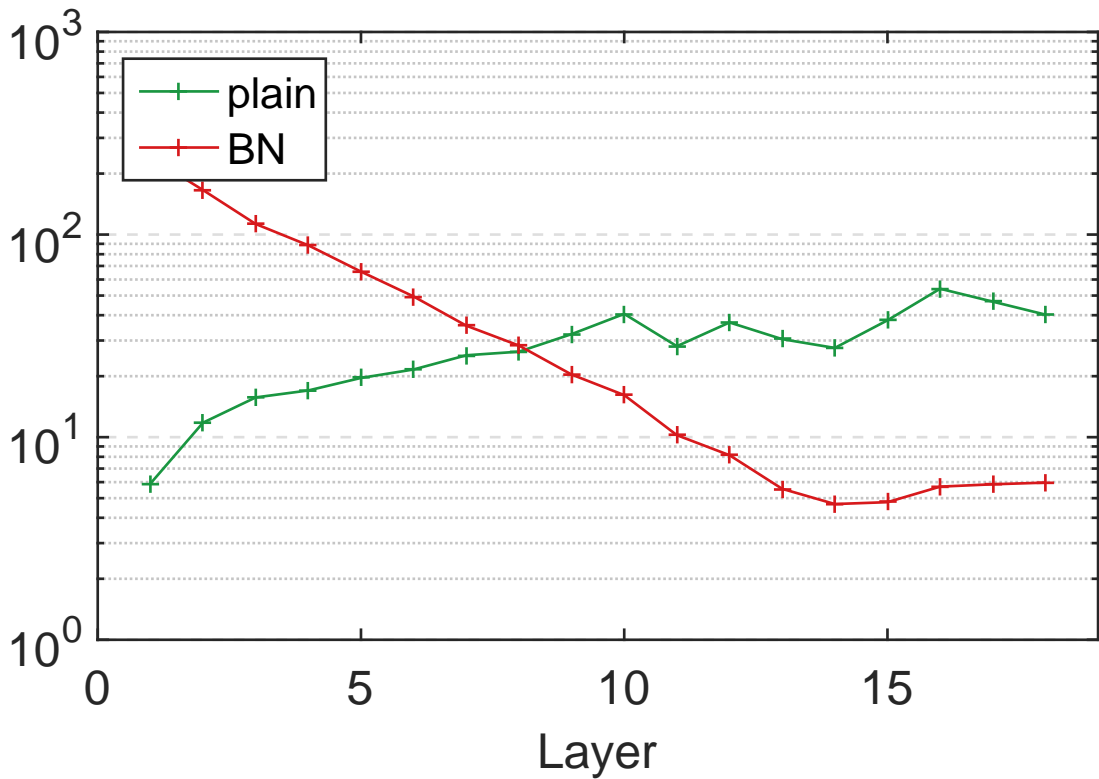

Supplement: Supplementary file 177 [file 123470375-supp.zip]

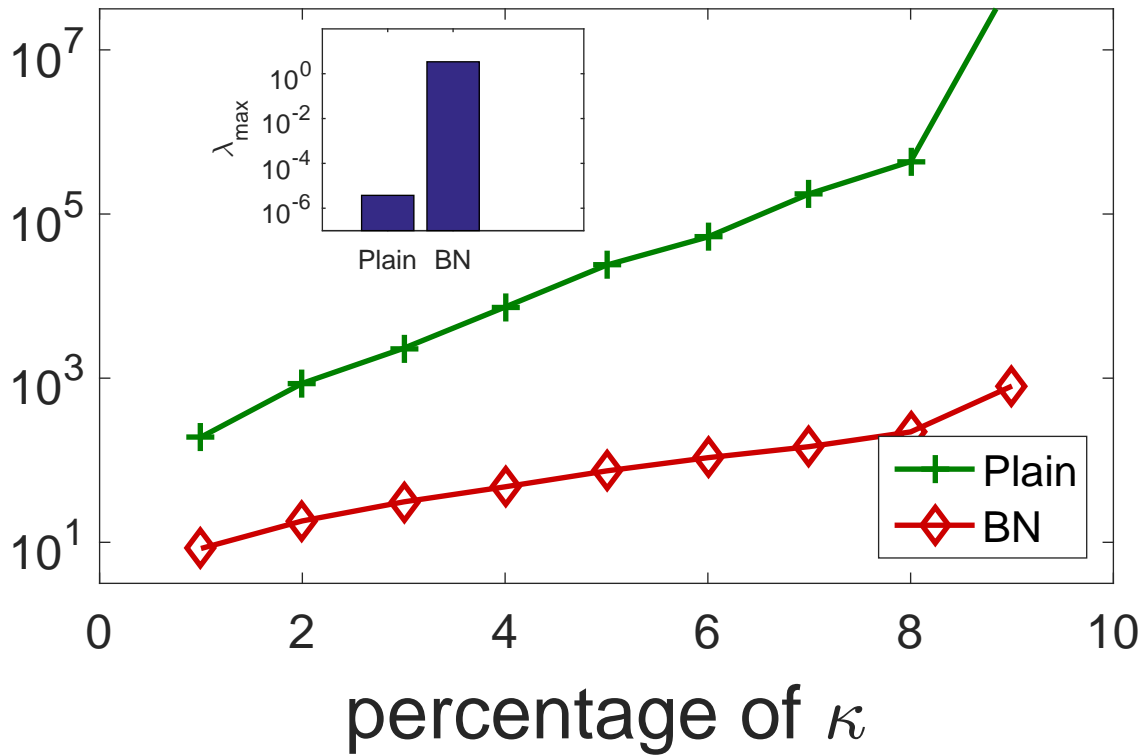

Supplement: Supplementary file 178 [file 123470375-supp.zip]

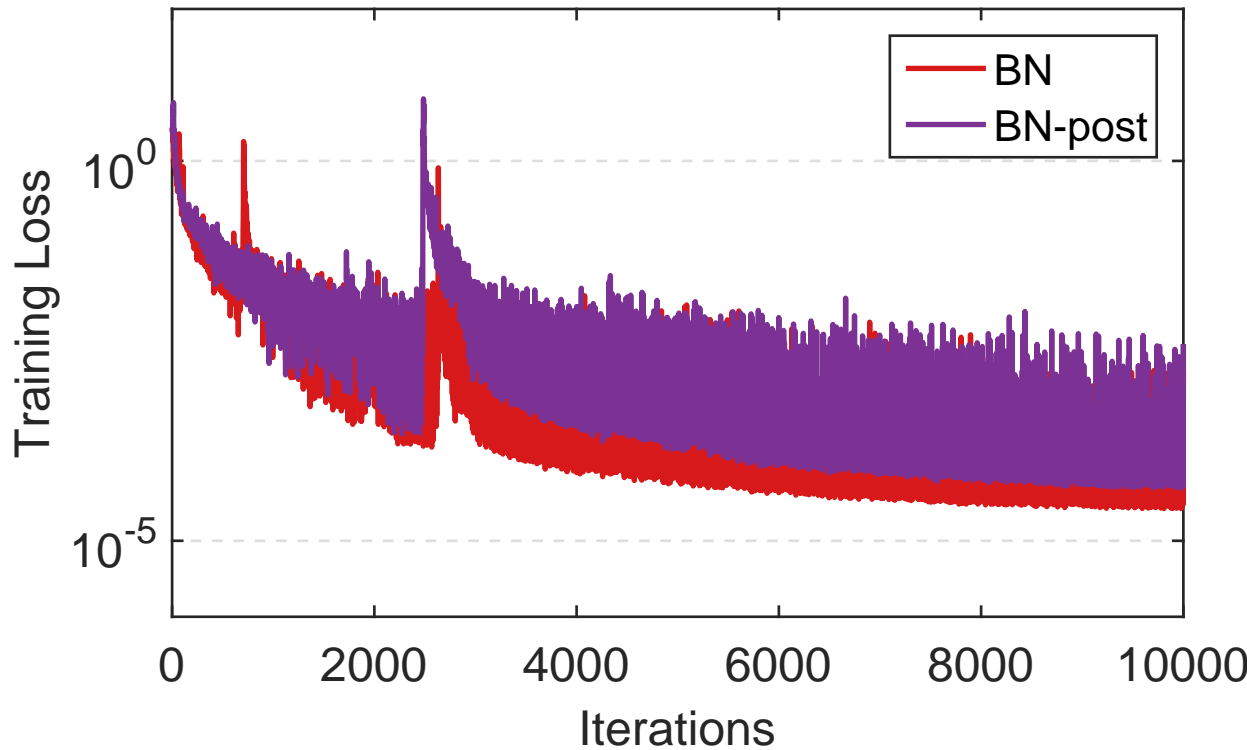

Supplement: Supplementary file 179 [file 123470375-supp.zip]

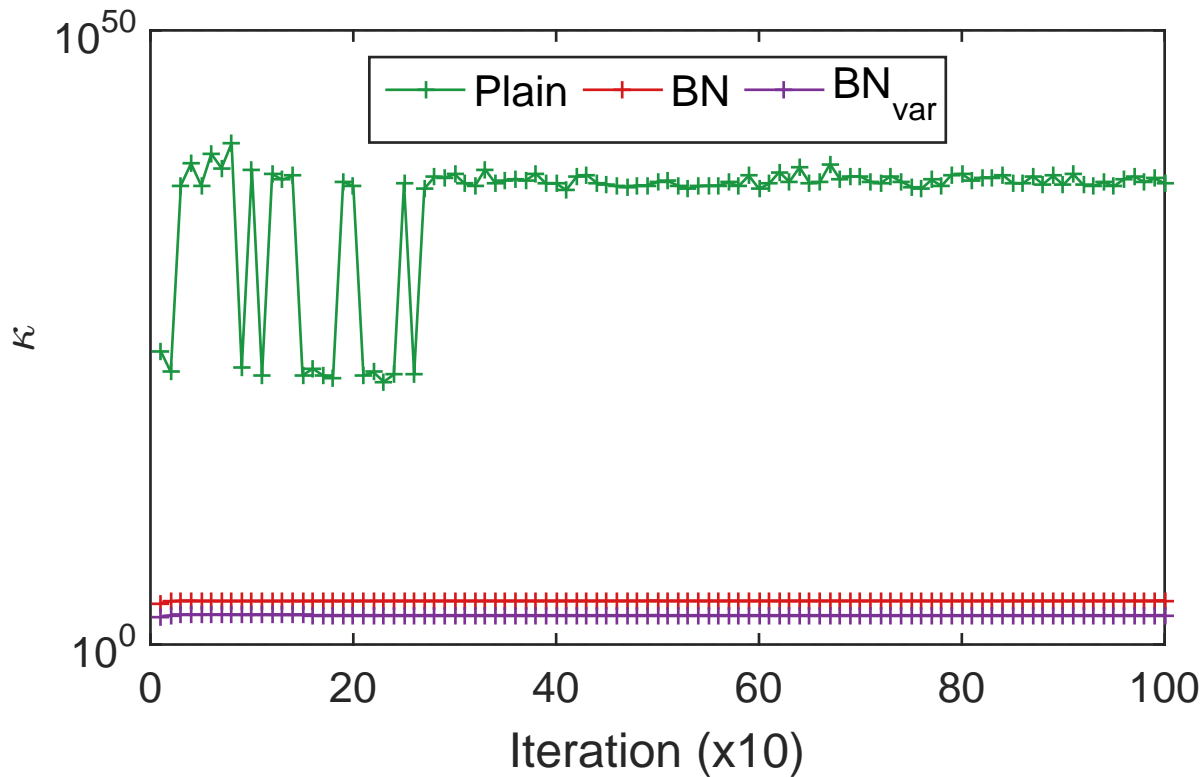

Supplement: Supplementary file 180 [file 123470375-supp.zip]

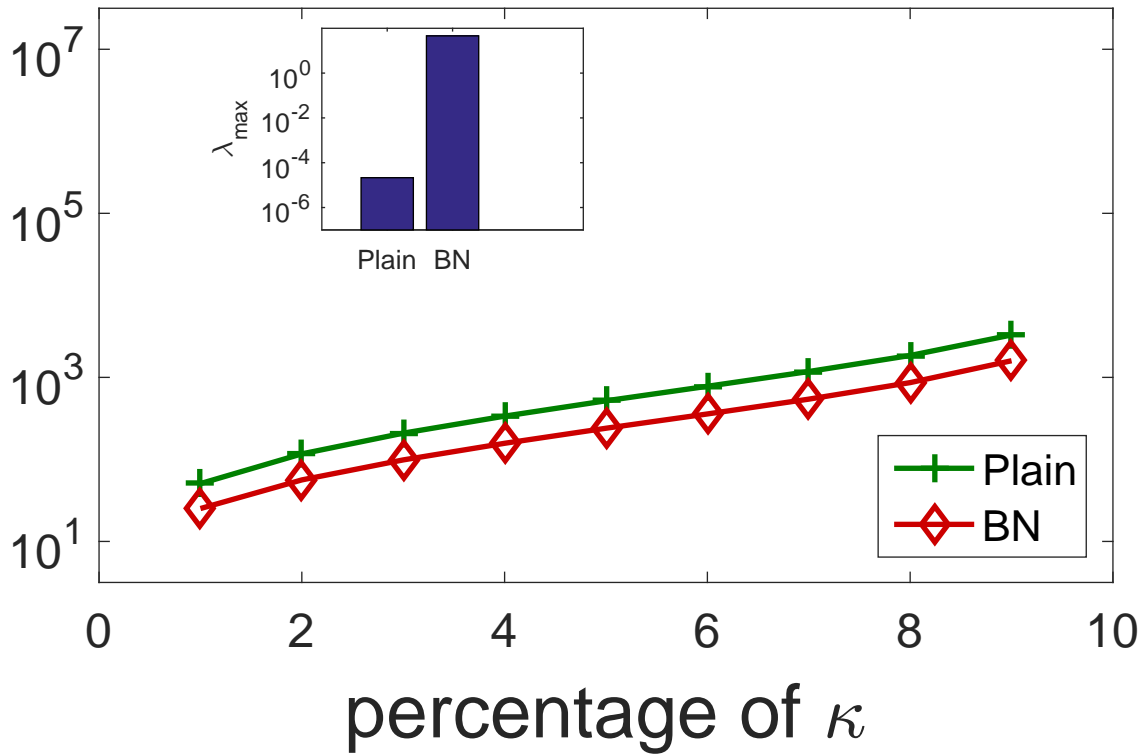

Supplement: Supplementary file 181 [file 123470375-supp.zip]

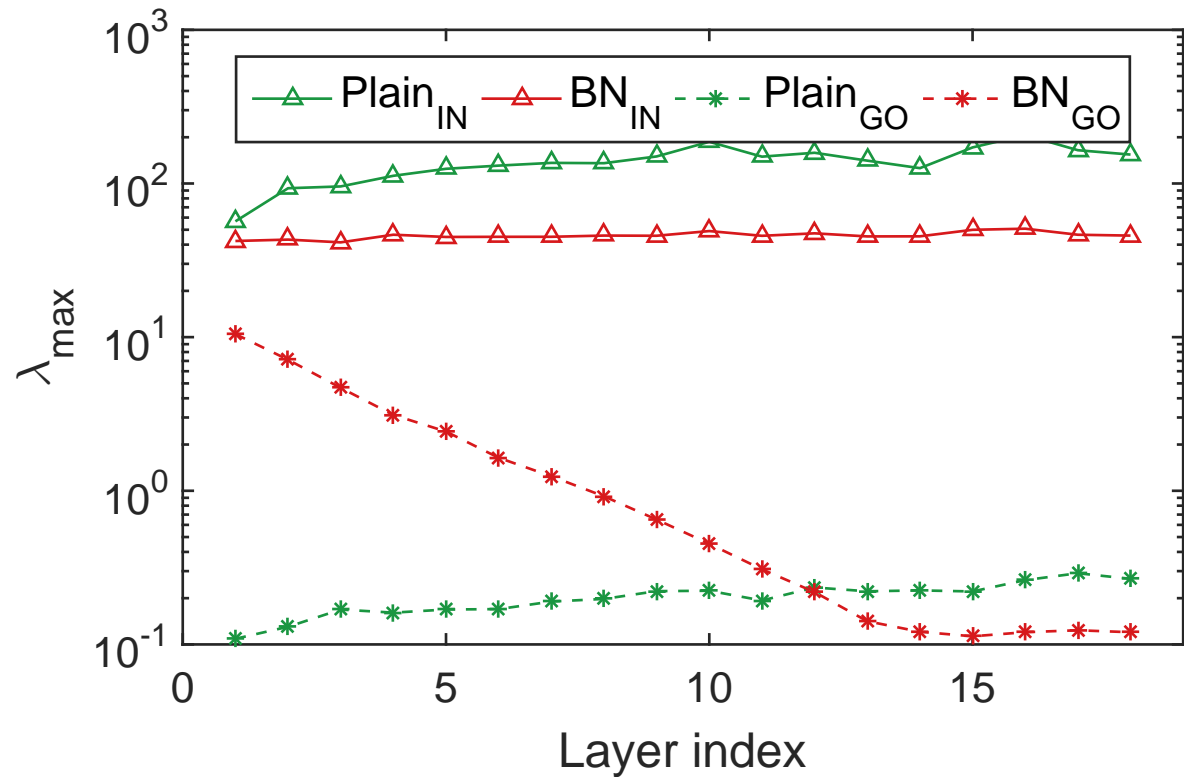

Supplement: Supplementary file 182 [file 123470375-supp.zip]

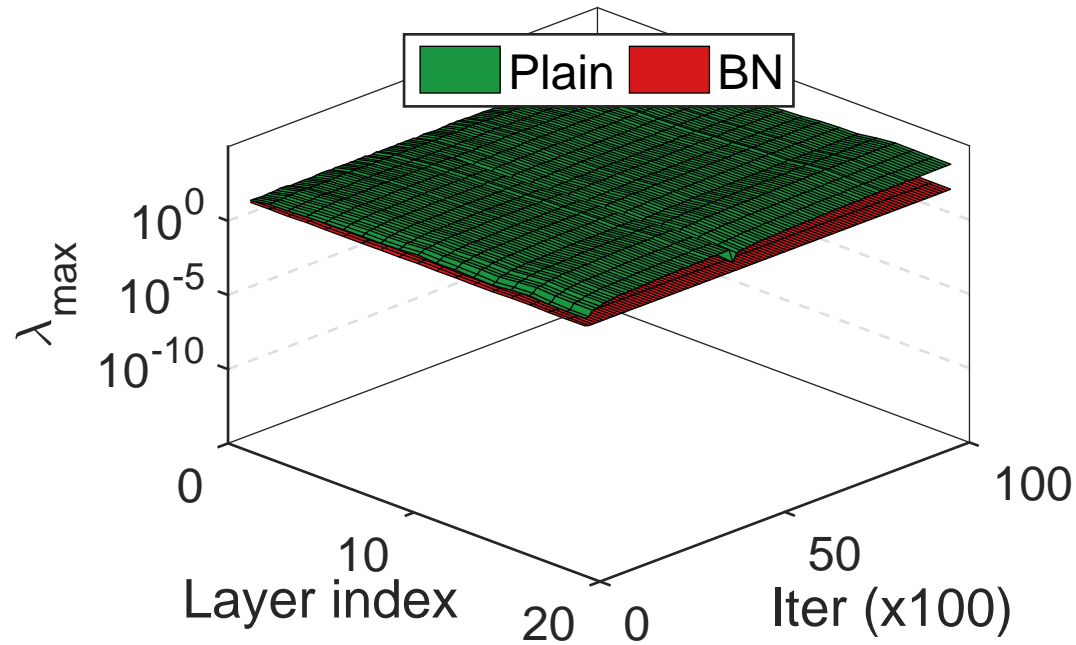

Supplement: Supplementary file 183 [file 123470375-supp.zip]

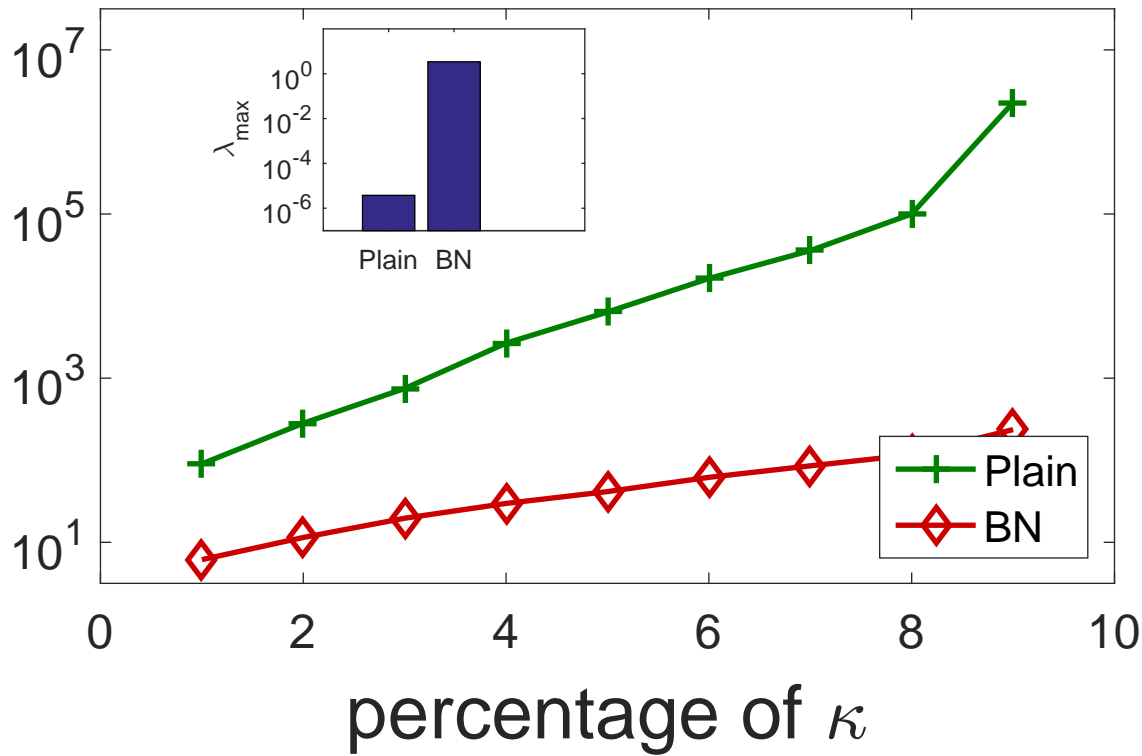

Supplement: Supplementary file 184 [file 123470375-supp.zip]

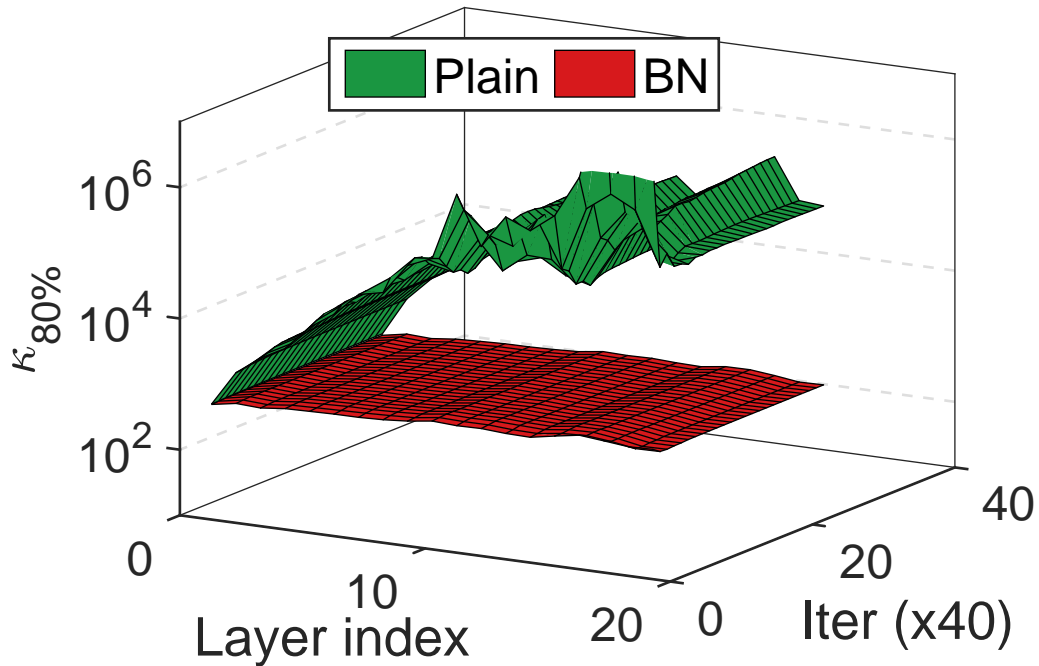

Supplement: Supplementary file 185 [file 123470375-supp.zip]

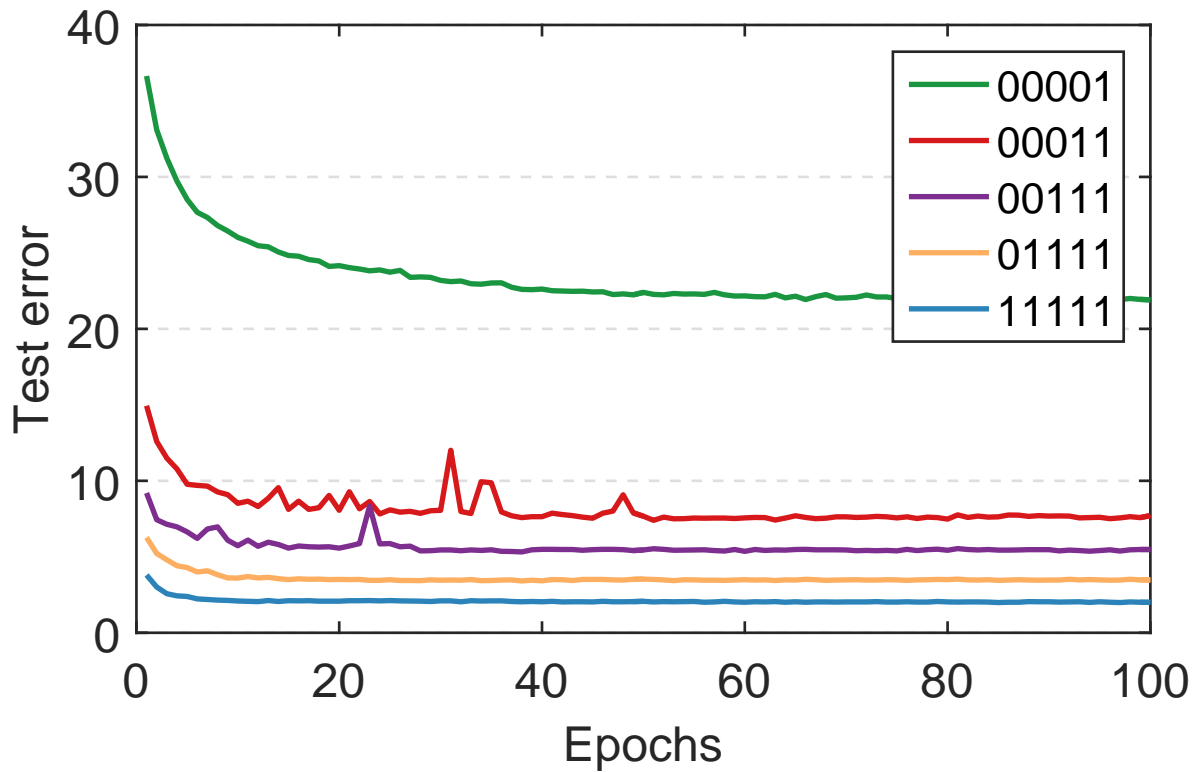

Supplement: Supplementary file 186 [file 123470375-supp.zip]

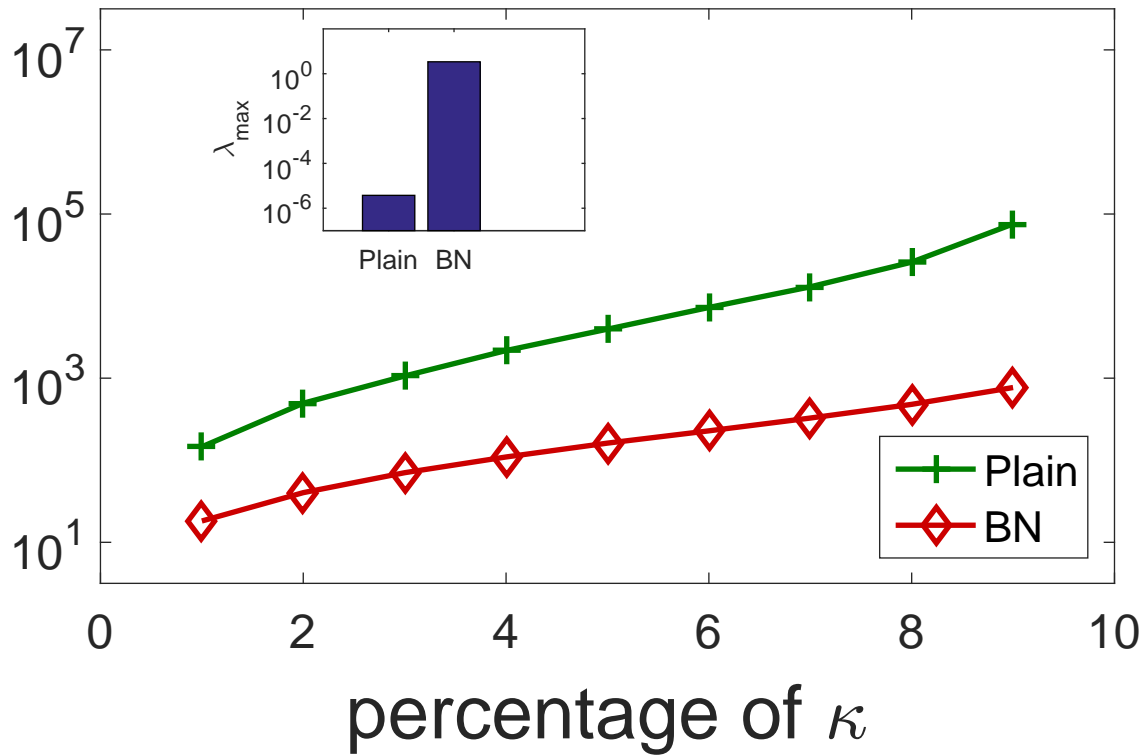

Supplement: Supplementary file 187 [file 123470375-supp.zip]

$\kappa(\text{gradOutput})$

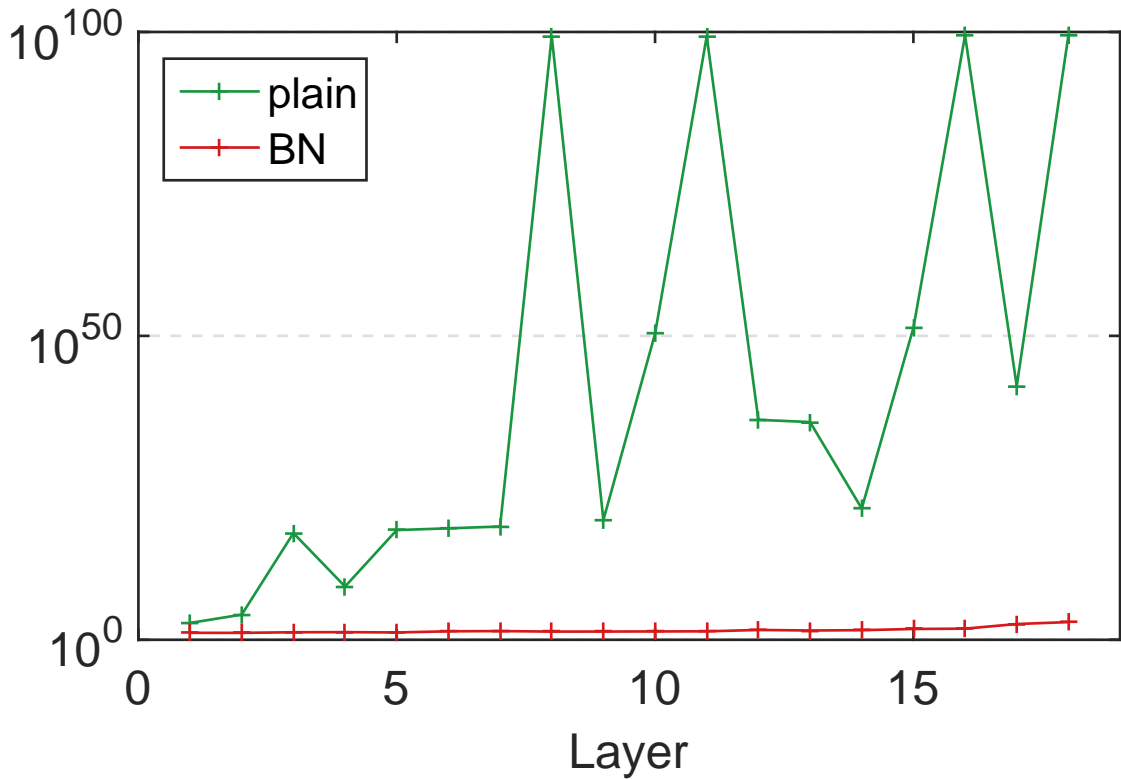

Supplement: Supplementary file 188 [file 123470375-supp.zip]

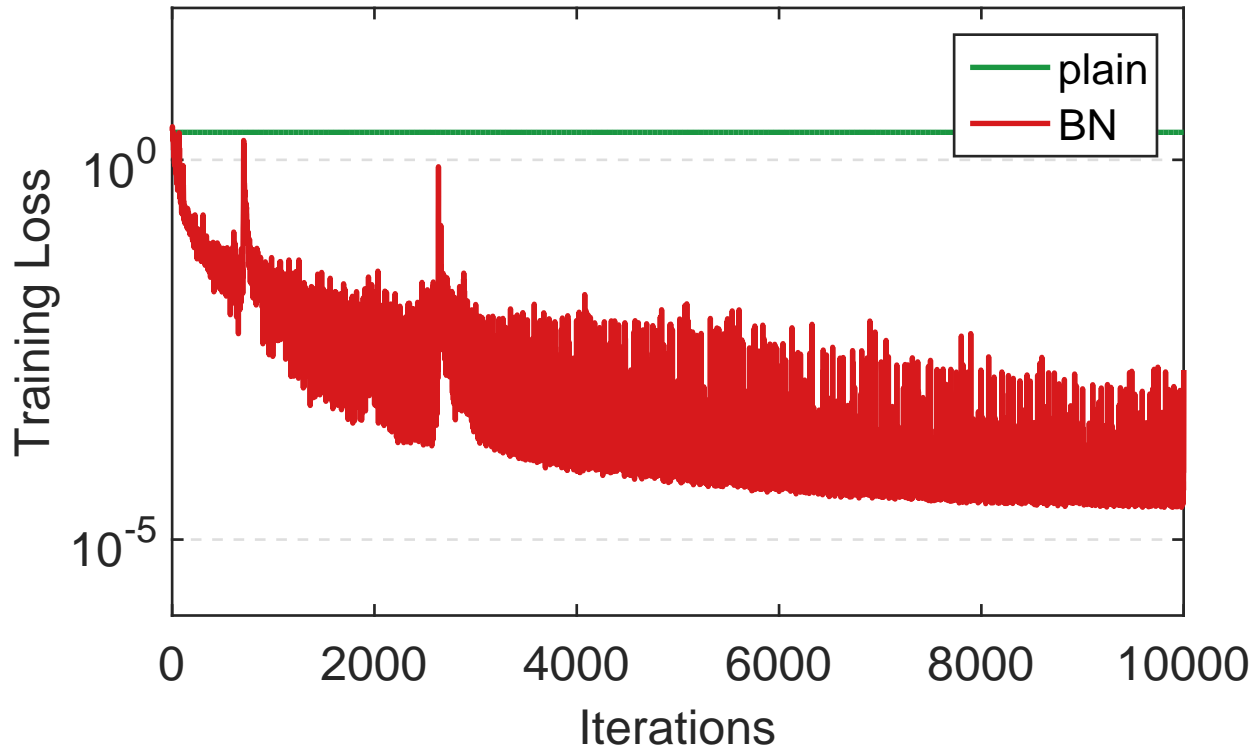

Supplement: Supplementary file 189 [file 123470375-supp.zip]

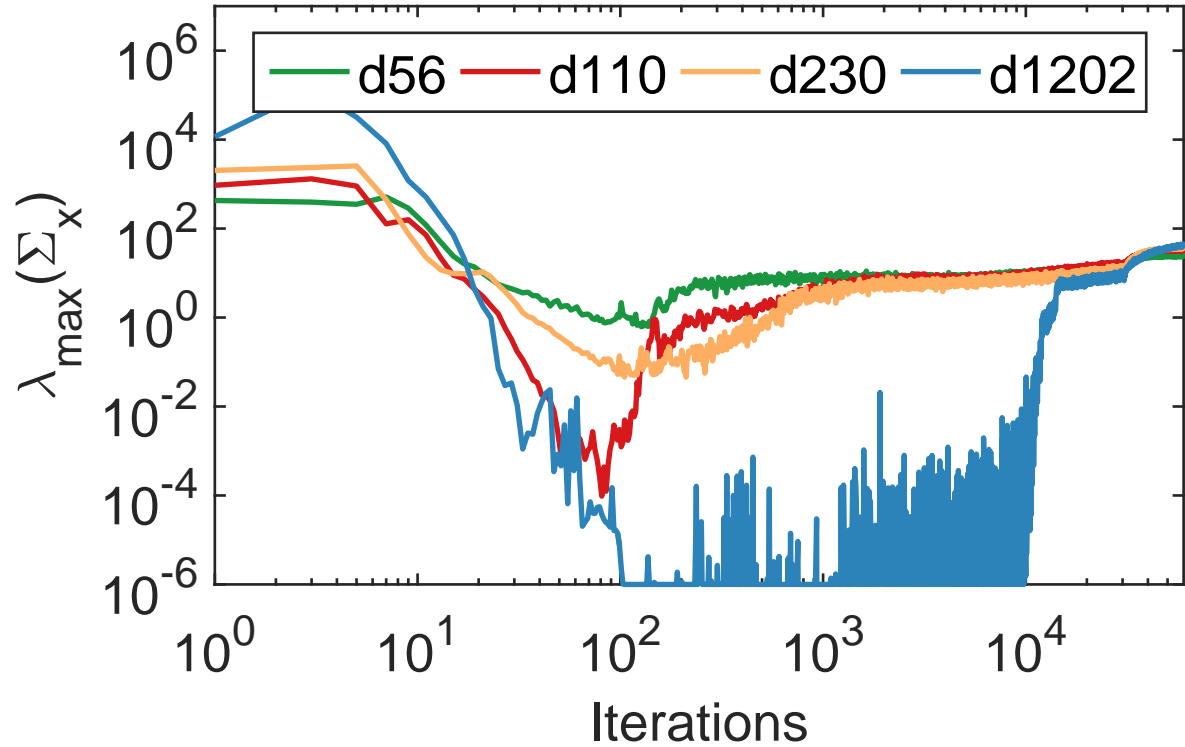

Supplement: Supplementary file 190 [file 123470375-supp.zip]

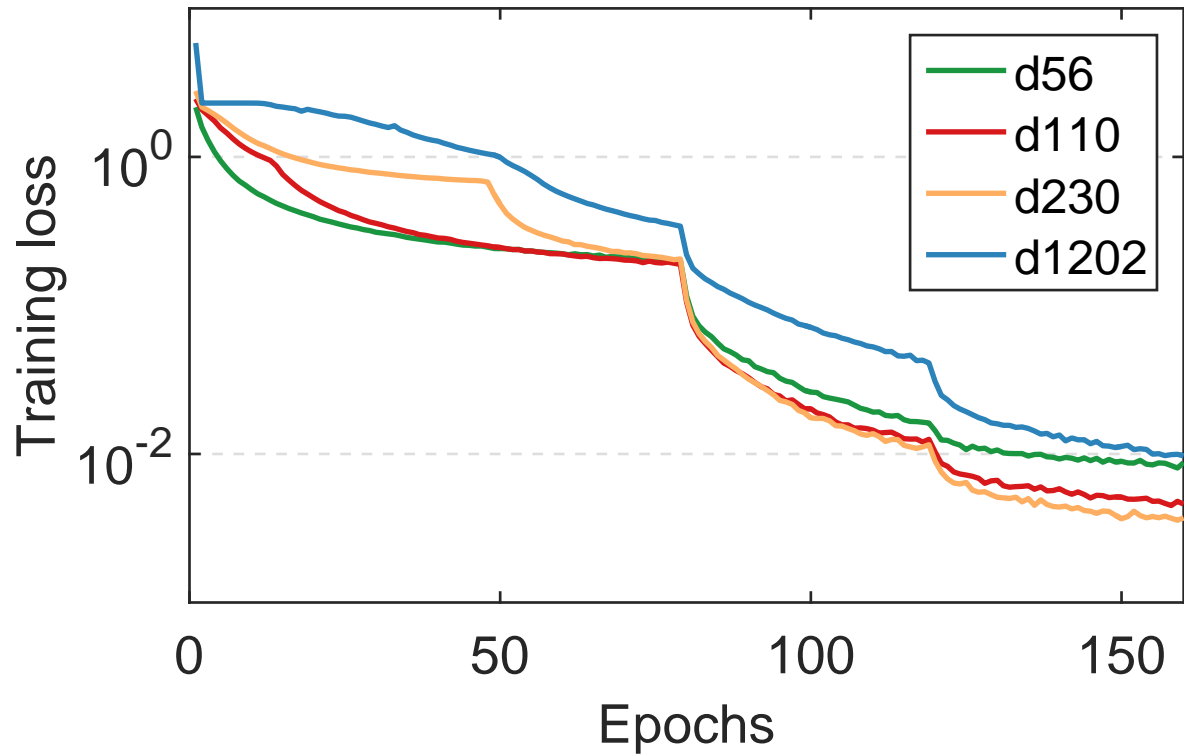

Supplement: Supplementary file 191 [file 123470375-supp.zip]

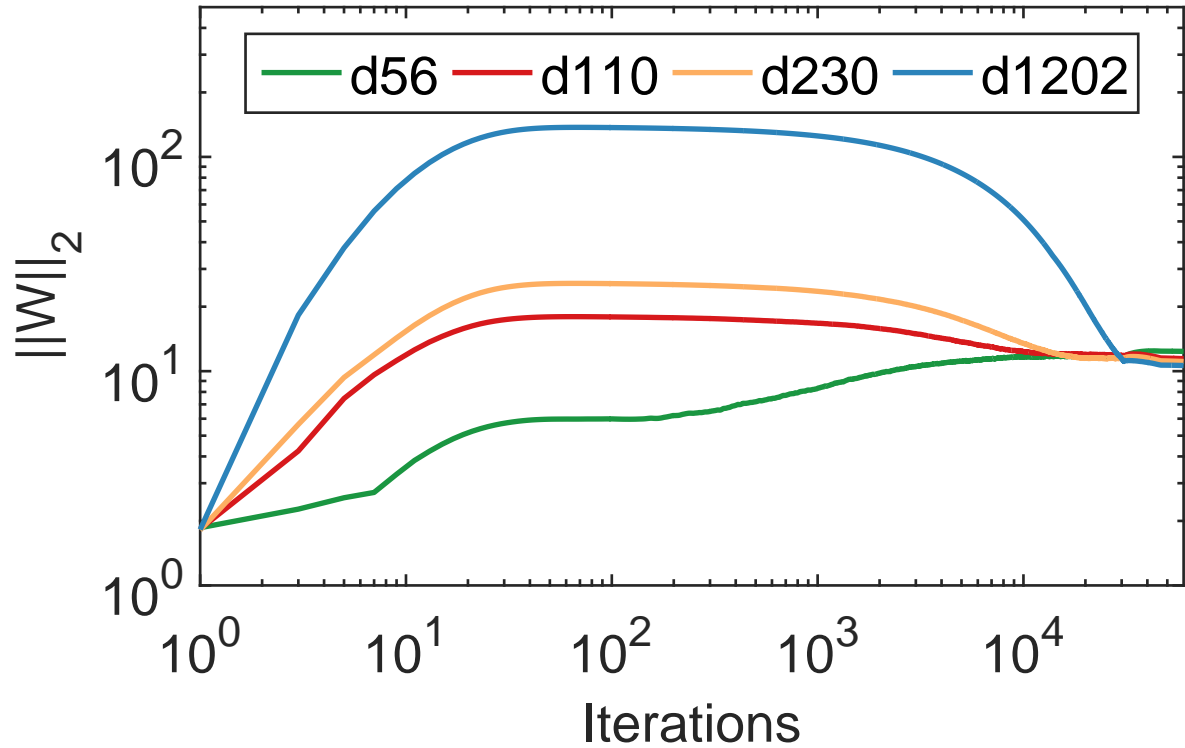

Supplement: Supplementary file 192 [file 123470375-supp.zip]

Training loss

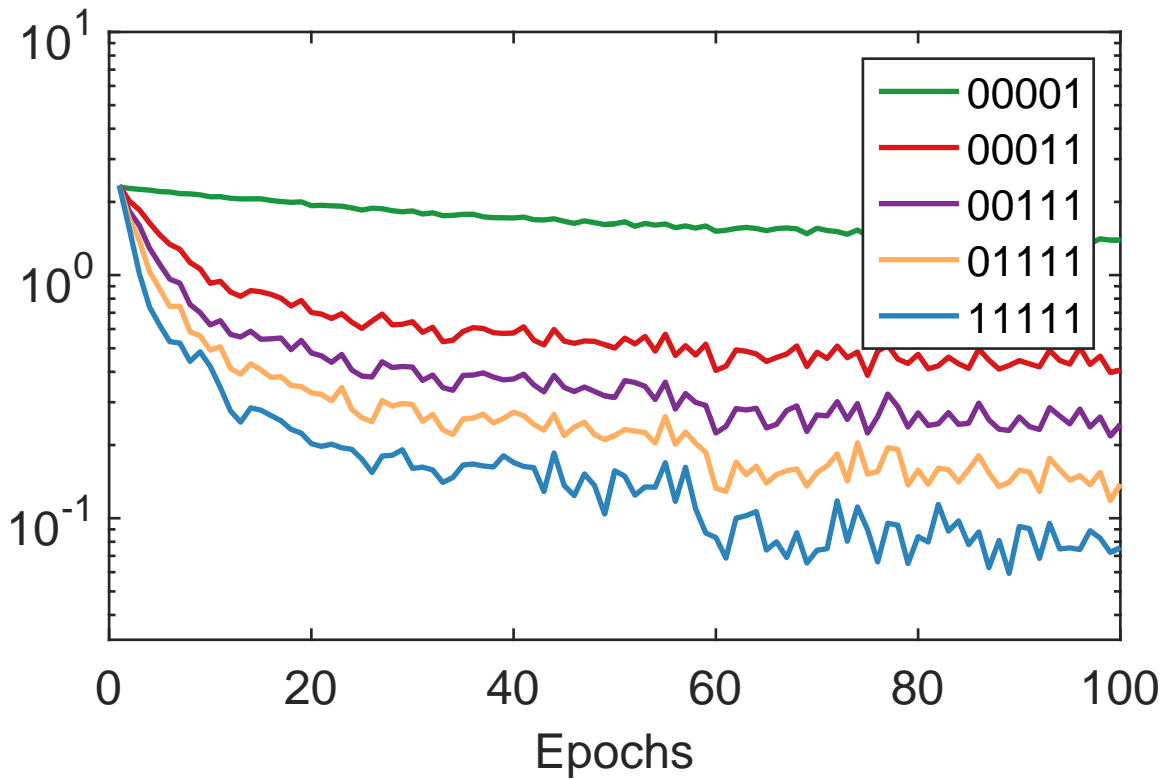

Supplement: Supplementary file 193 [file 123470375-supp.zip]

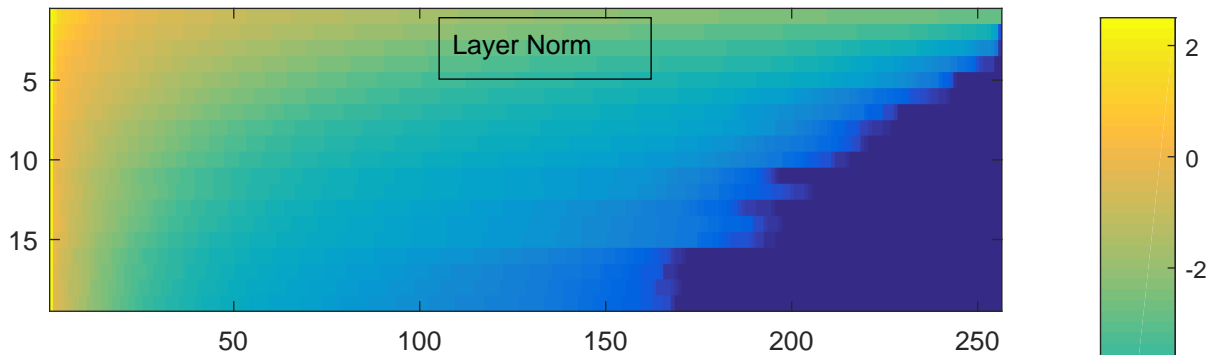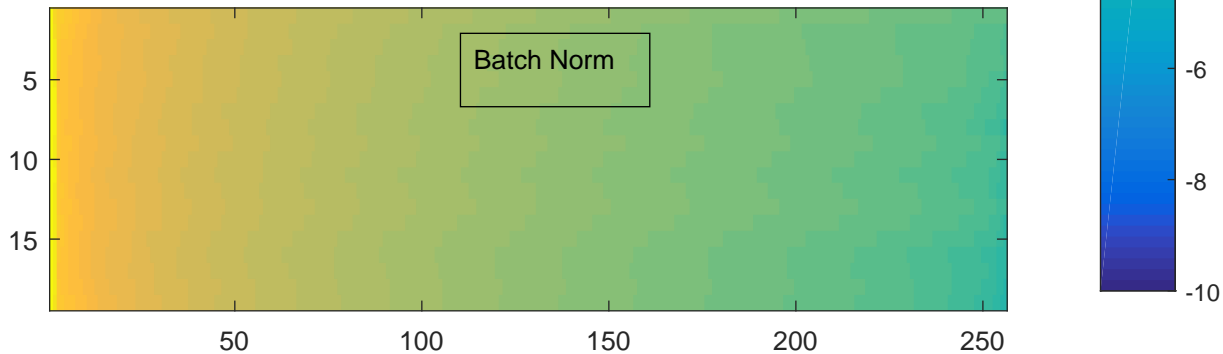

Supplement: Supplementary file 194 [file 123470375-supp.zip]

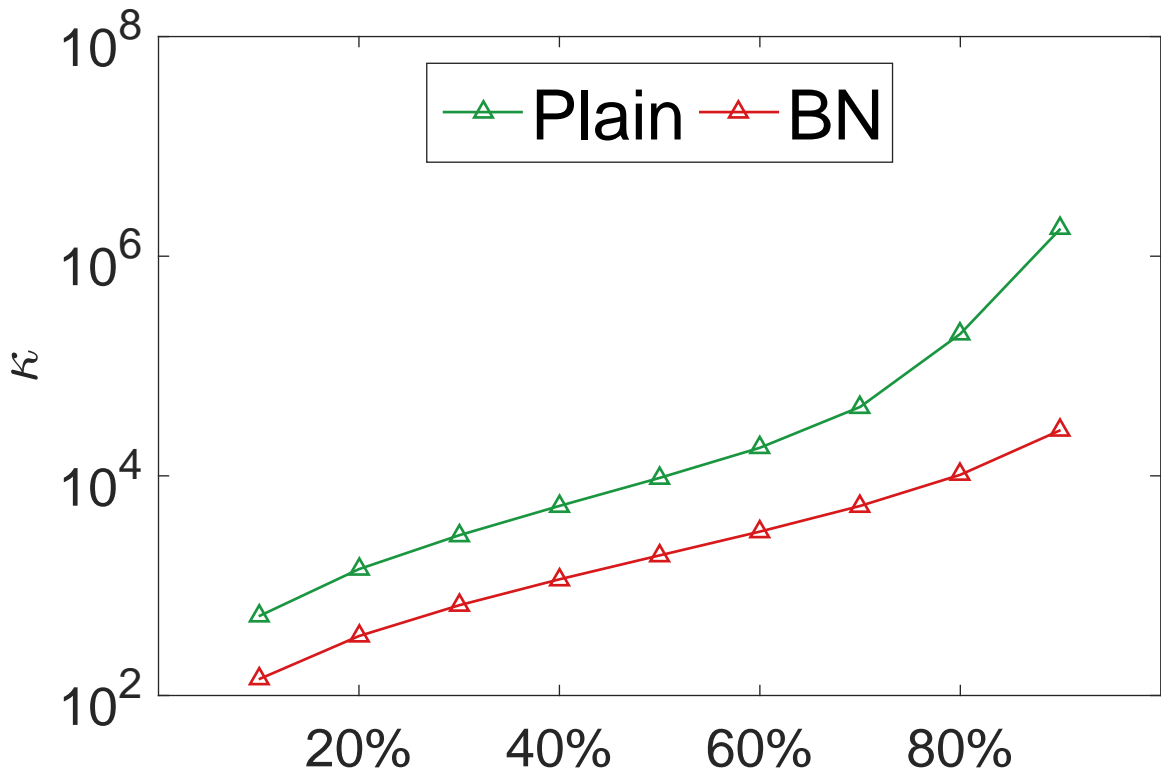

Supplement: Supplementary file 195 [file 123470375-supp.zip]

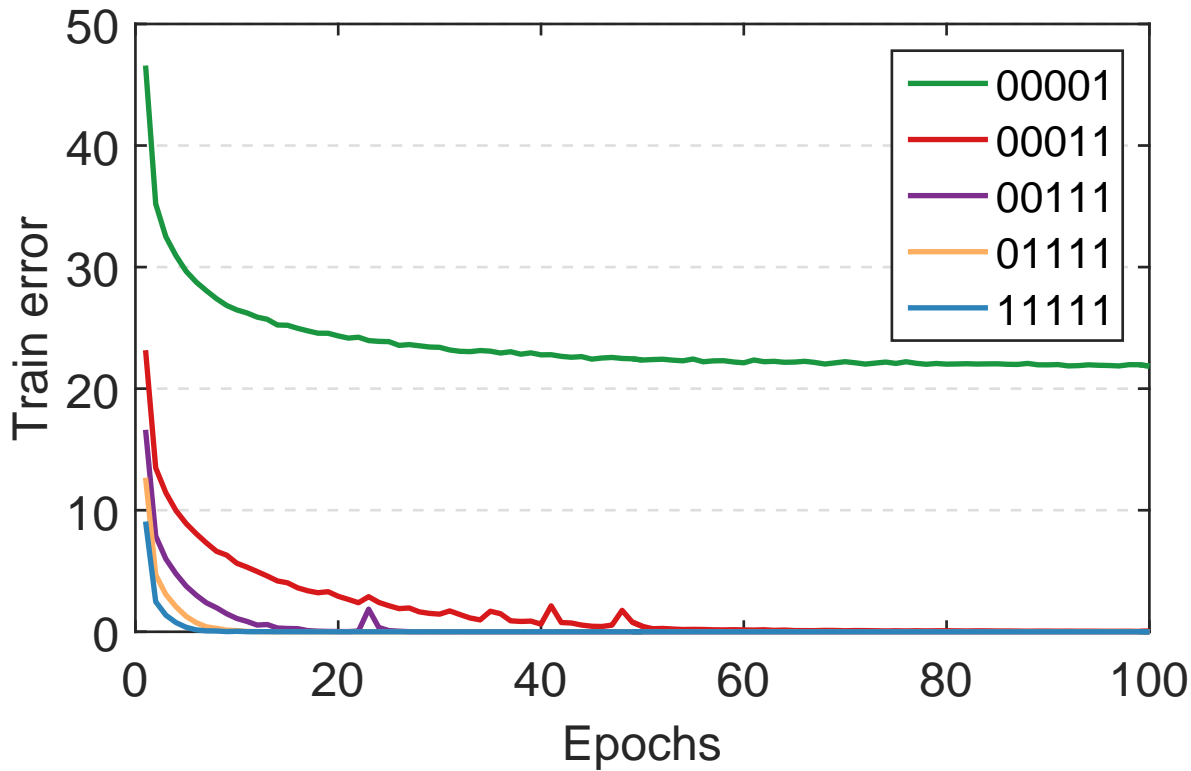

Supplement: Supplementary file 196 [file 123470375-supp.zip]

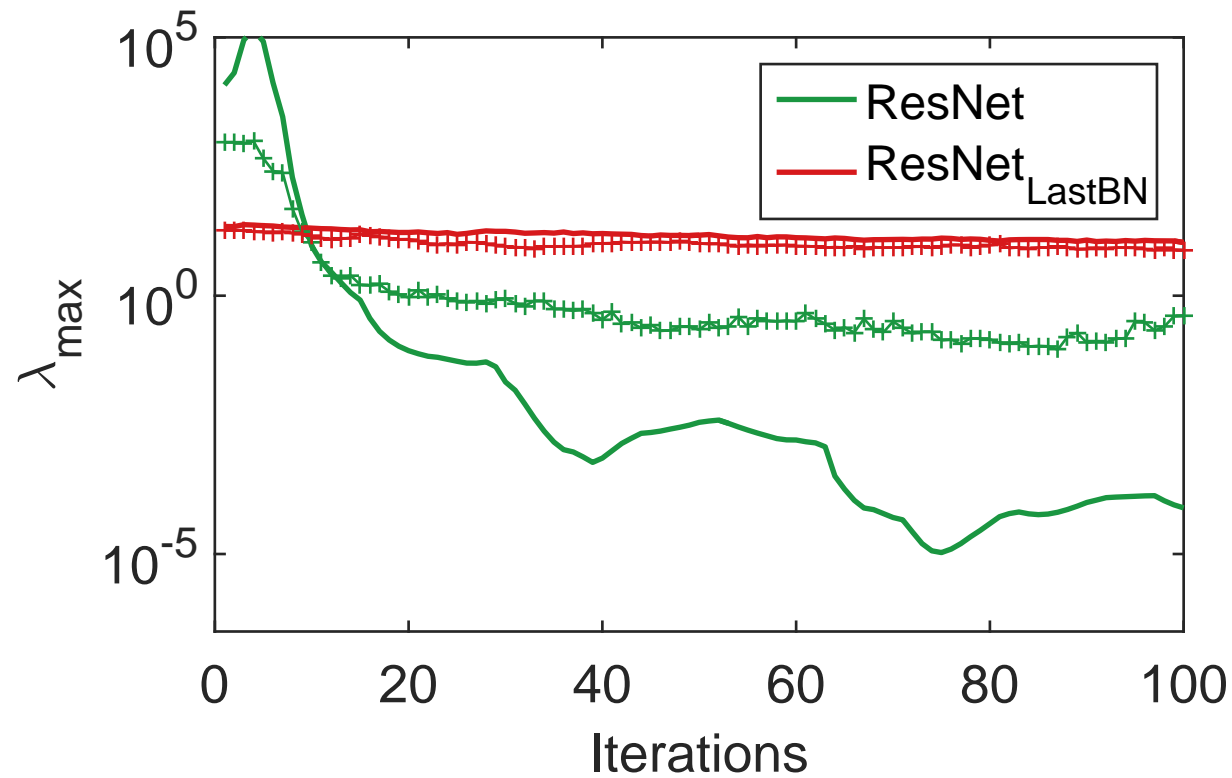

Supplement: Supplementary file 197 [file 123470375-supp.zip]

Percentage of dying neuro

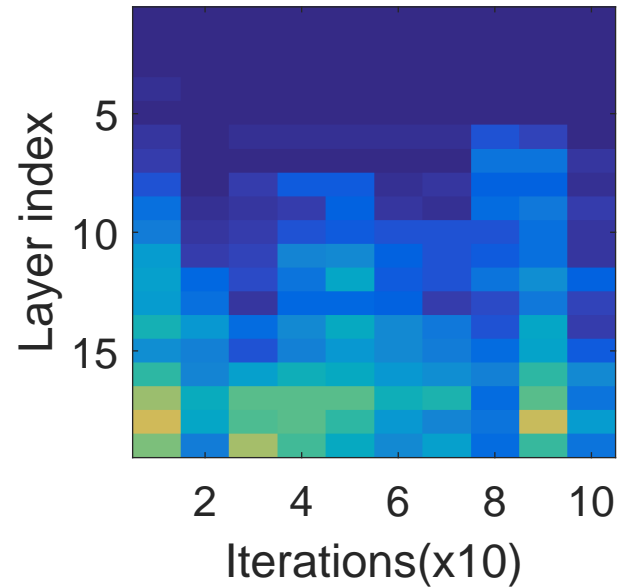

Percentage of full neuro

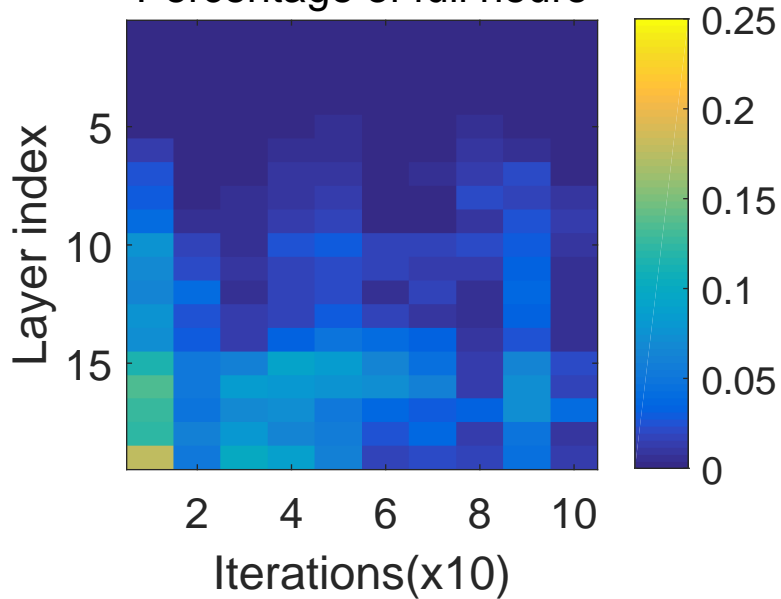

Supplement: Supplementary file 198 [file 123470375-supp.zip]

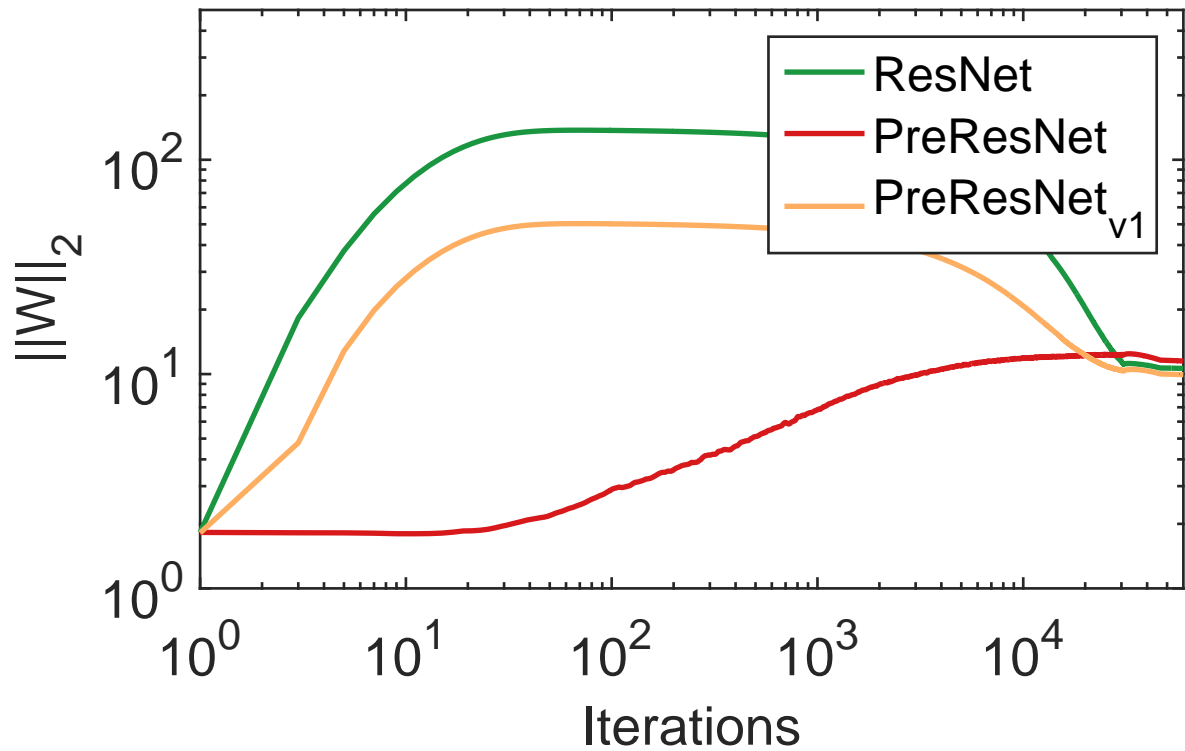

Supplement: Supplementary file 199 [file 123470375-supp.zip]

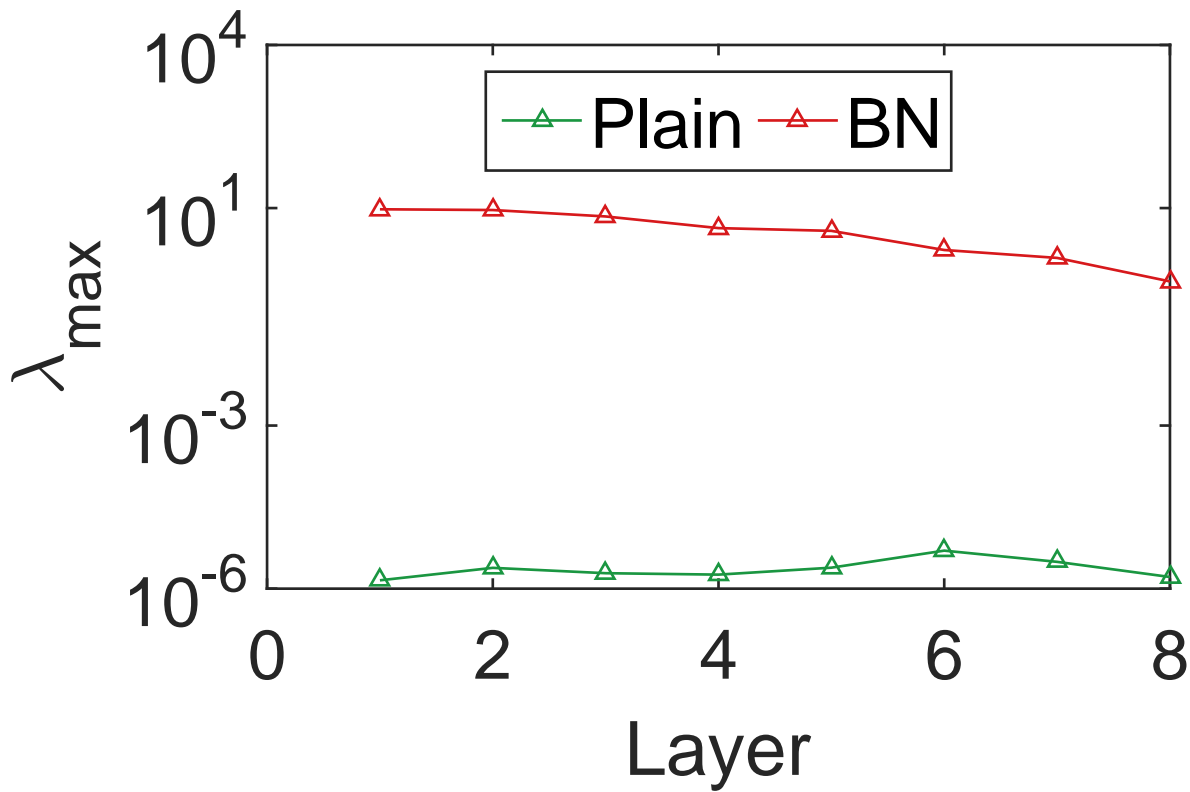

Supplement: Supplementary file 200 [file 123470375-supp.zip]



Supplement: Supplementary file 201 [file 123470375-supp.zip]
