# Supplementary material (part 3 of 3)
Source: ML conference proceedings conference paper supplement (https://www.ecva.net/papers/eccv_2020/papers_ECCV/html/123470375_ECCV_2020_paper.php)

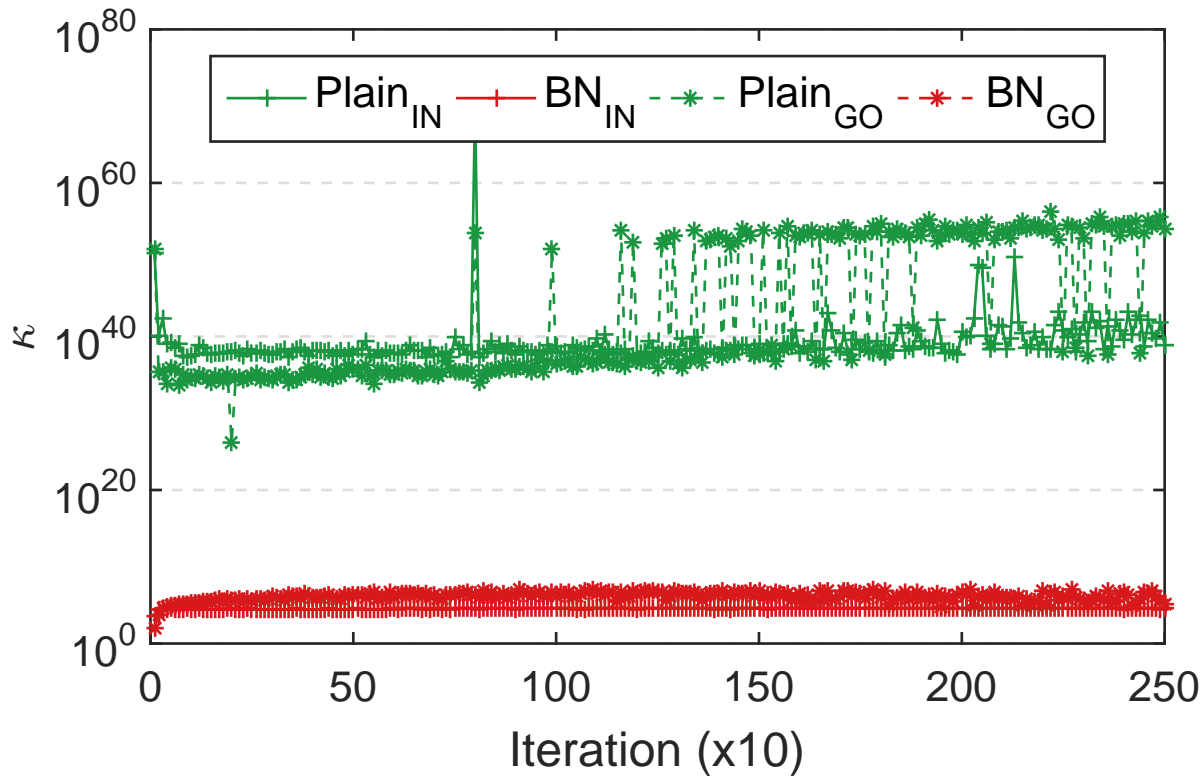

Supplement: Supplementary file 203 [file 123470375-supp.zip]

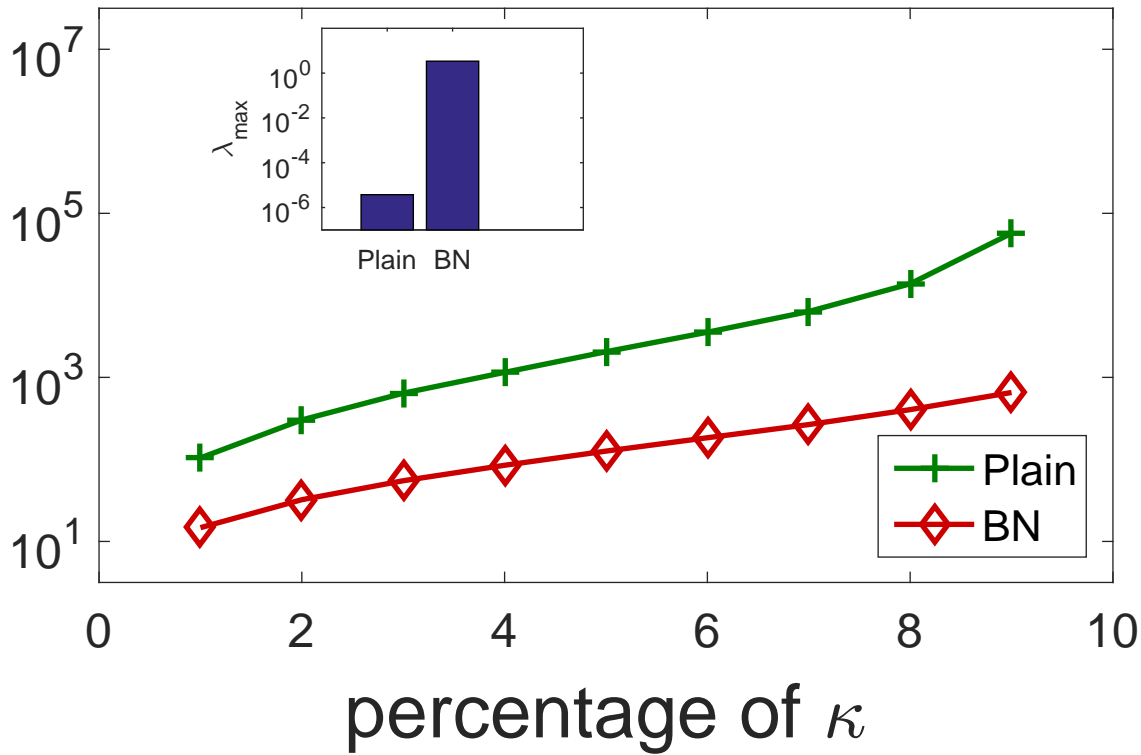

Supplement: Supplementary file 204 [file 123470375-supp.zip]

$\lambda_{\max}$ 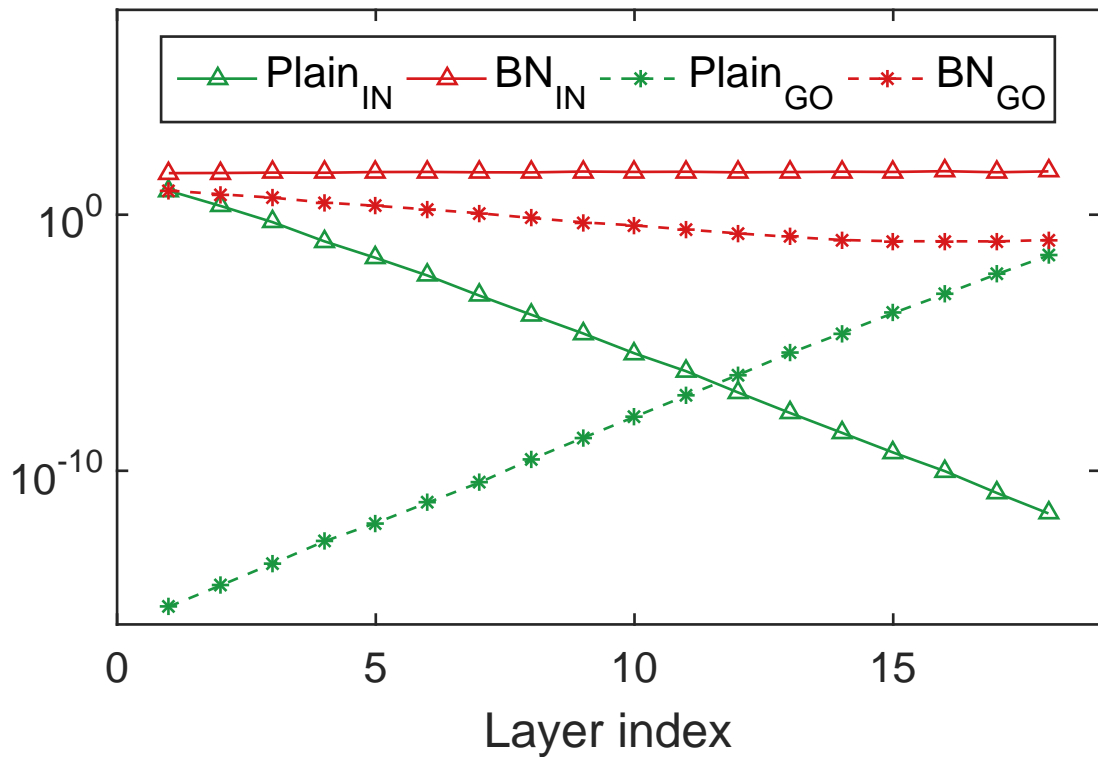

Supplement: Supplementary file 205 [file 123470375-supp.zip]

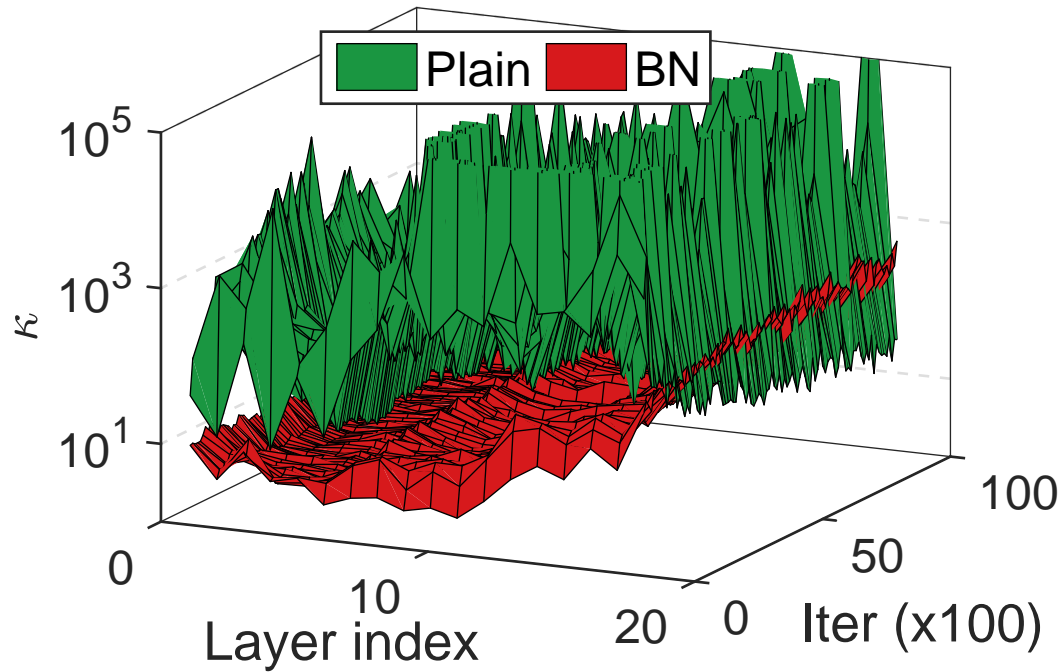

Supplement: Supplementary file 206 [file 123470375-supp.zip]

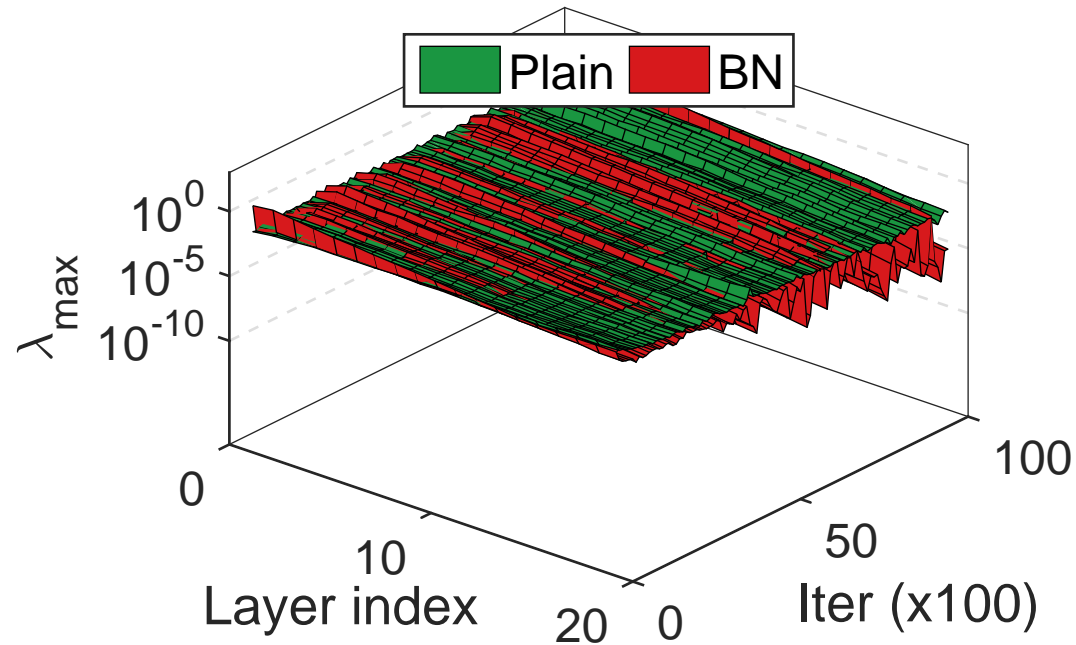

Supplement: Supplementary file 207 [file 123470375-supp.zip]

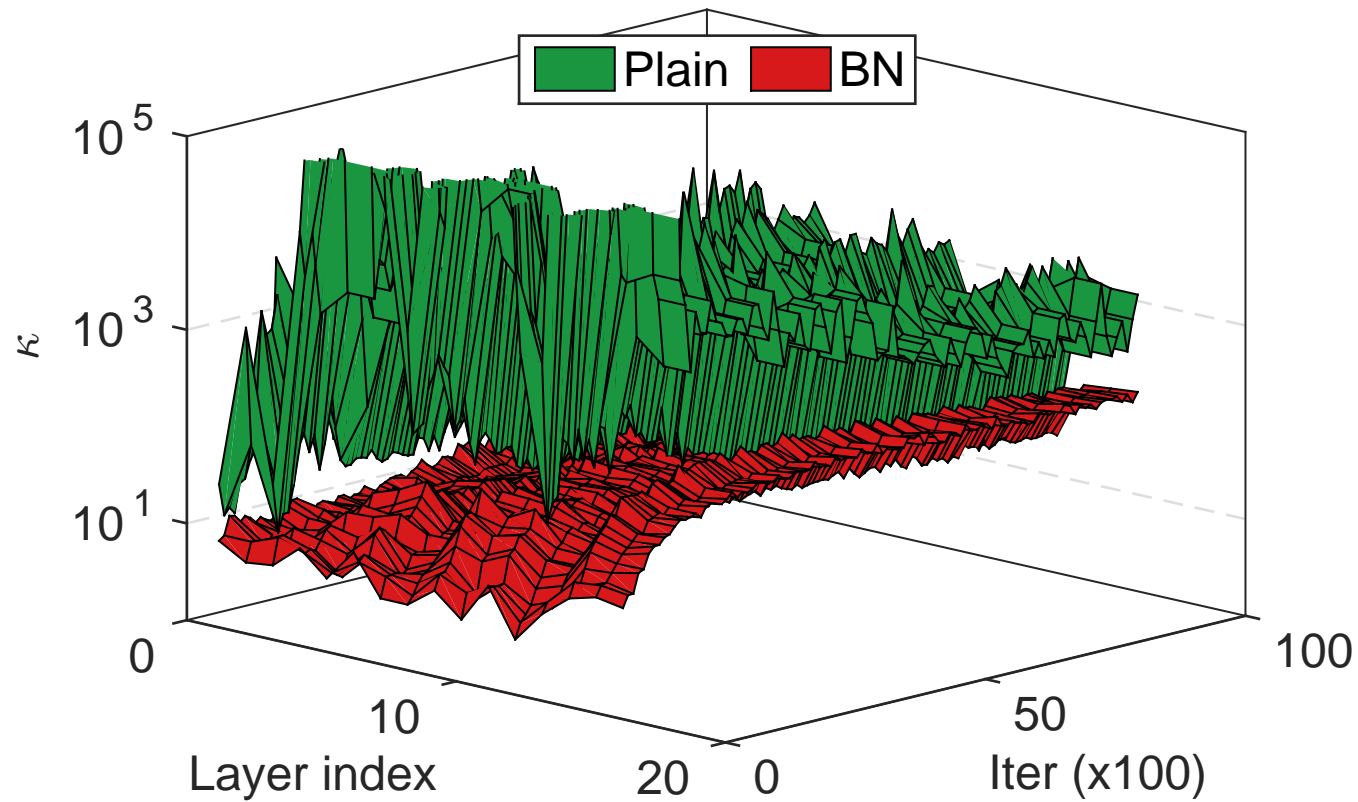

Supplement: Supplementary file 208 [file 123470375-supp.zip]

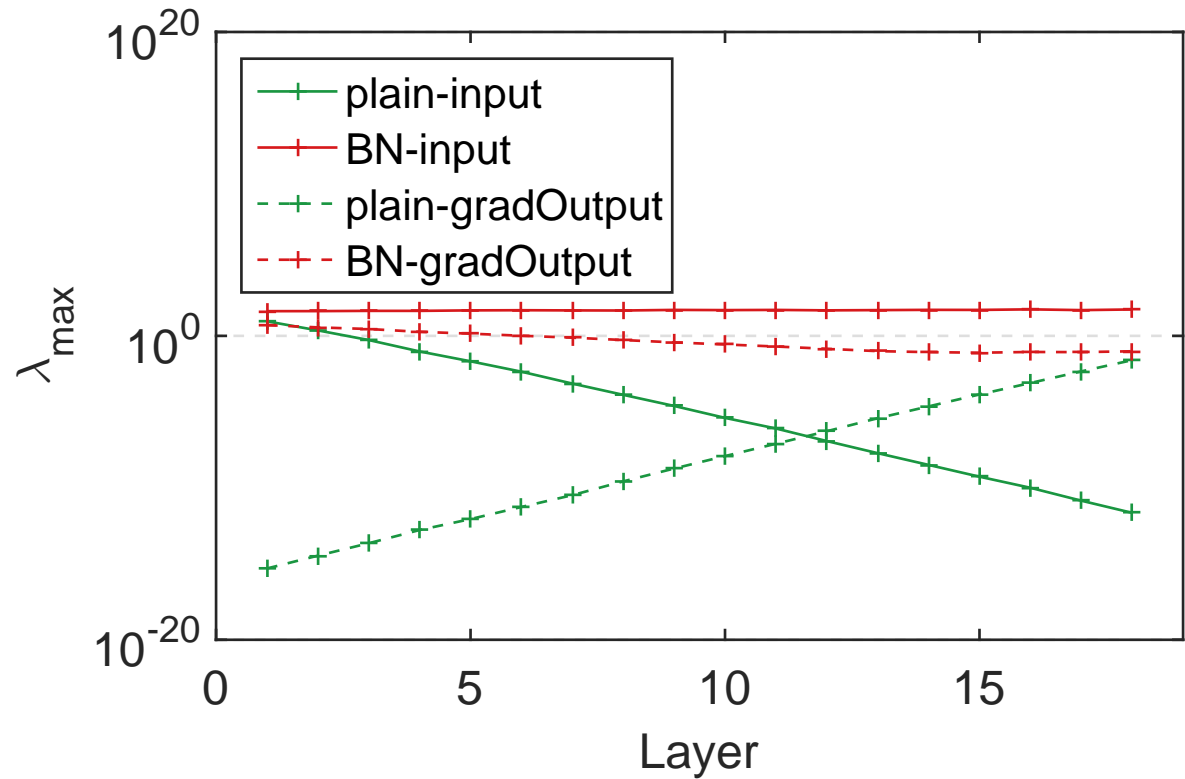

Supplement: Supplementary file 209 [file 123470375-supp.zip]

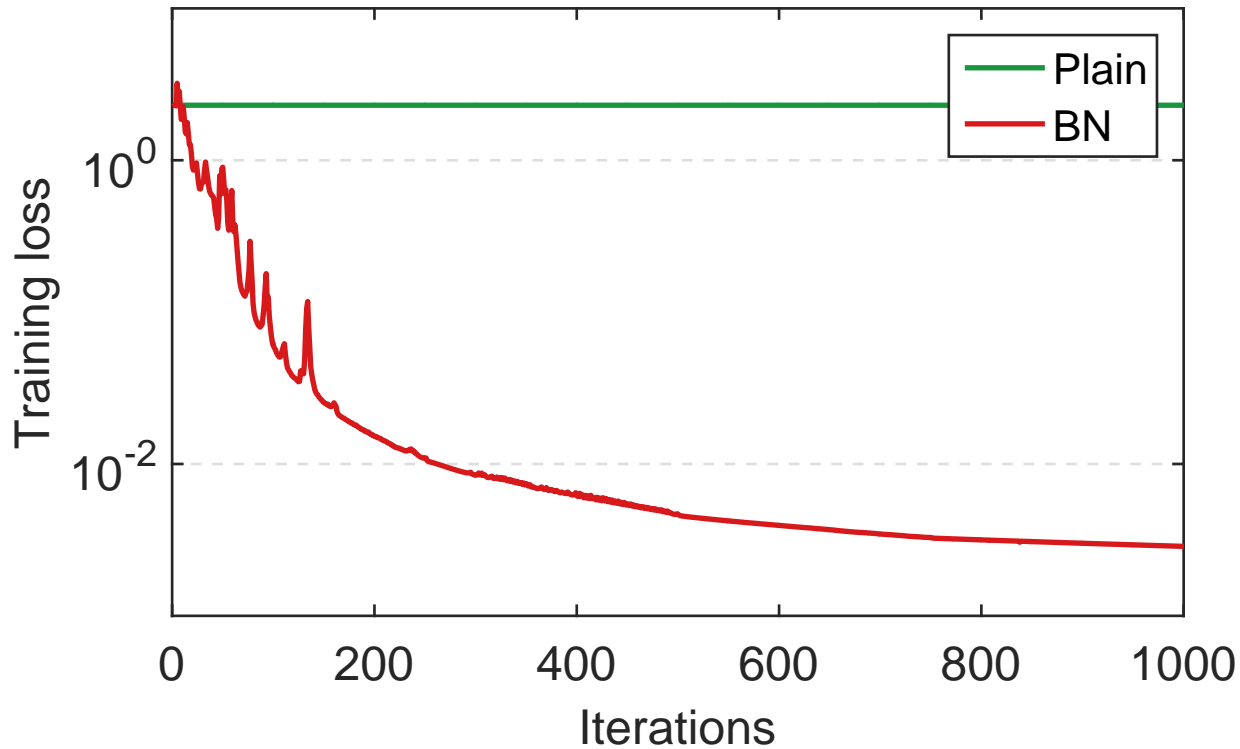

Supplement: Supplementary file 210 [file 123470375-supp.zip]

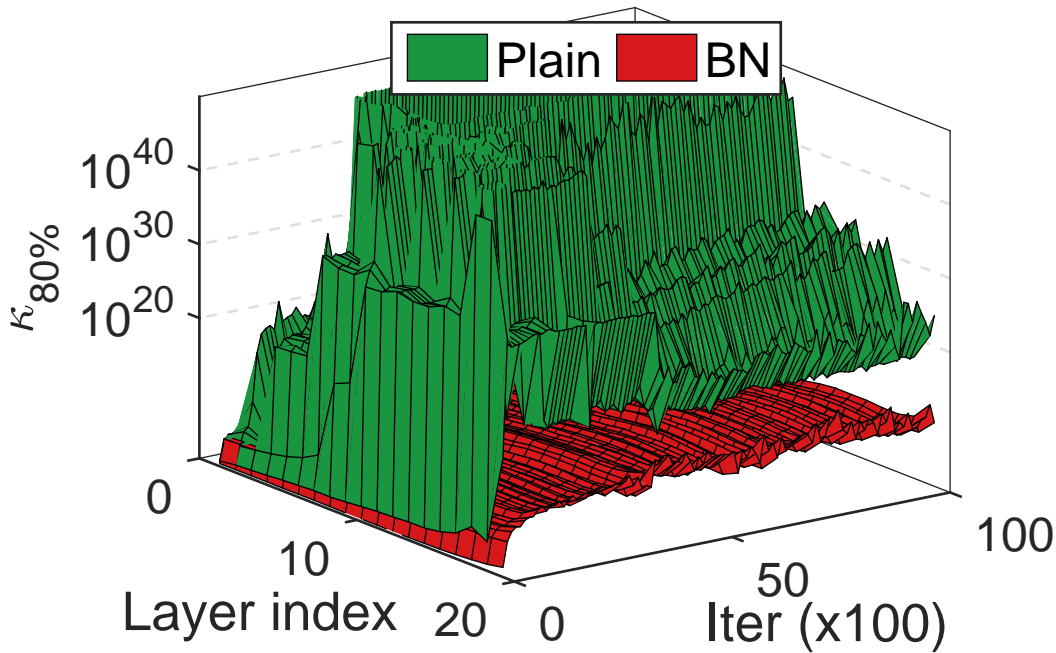

Supplement: Supplementary file 211 [file 123470375-supp.zip]

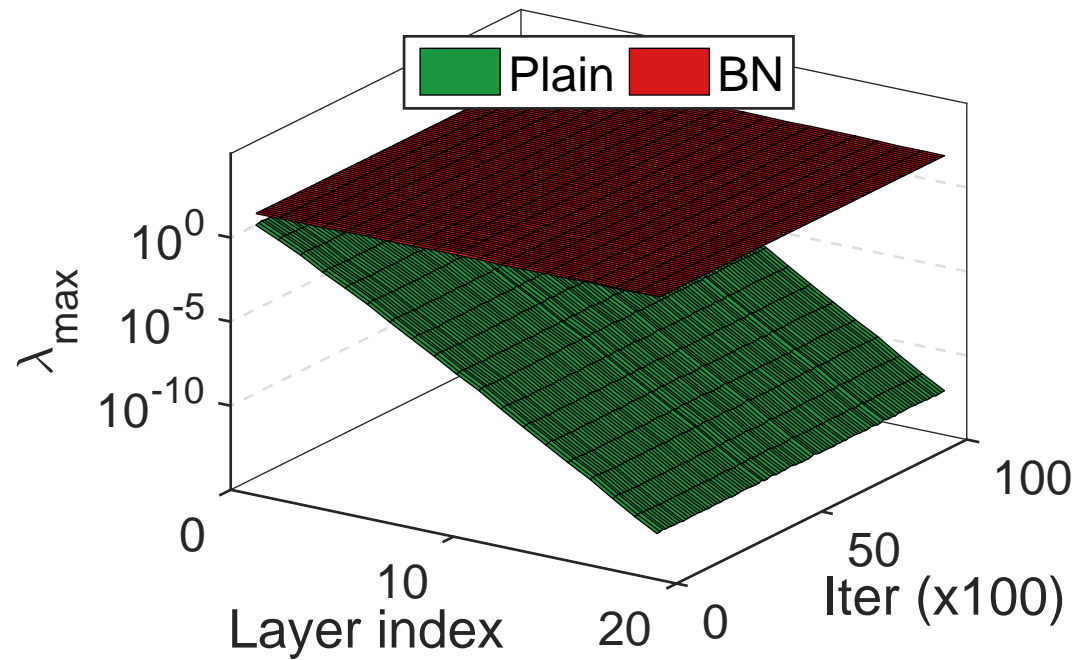

Supplement: Supplementary file 212 [file 123470375-supp.zip]

$\kappa(\text{gradOutput})$

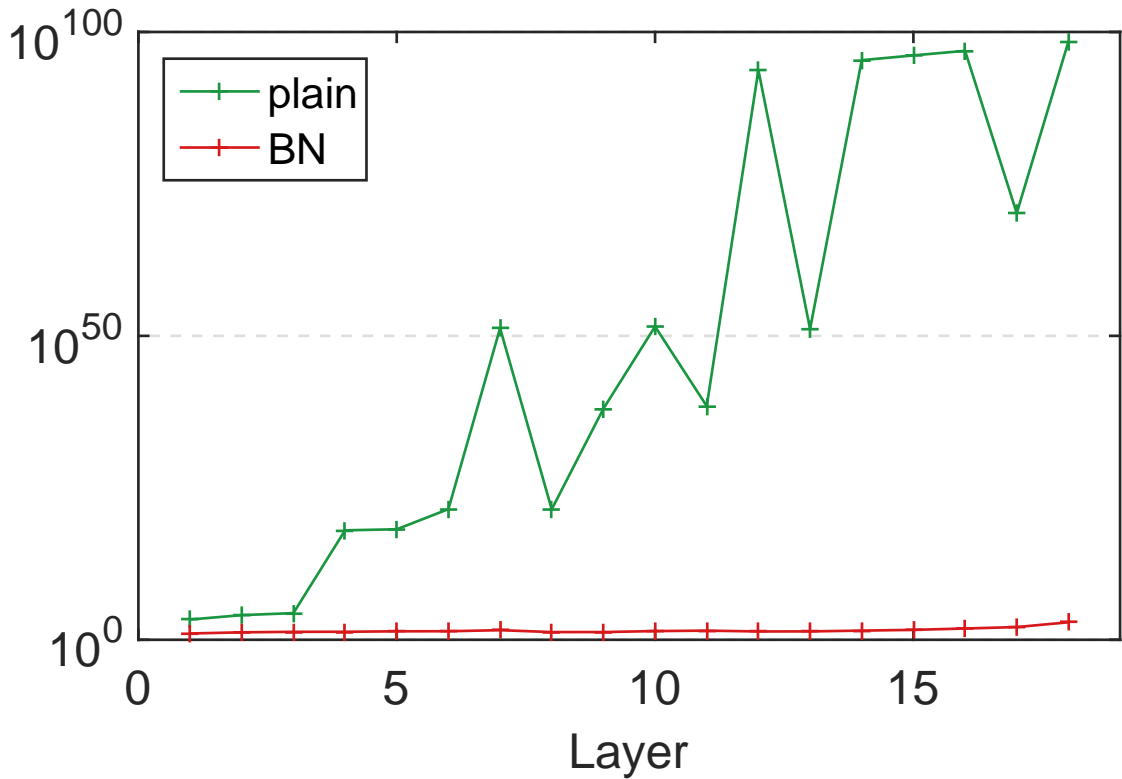

Supplement: Supplementary file 213 [file 123470375-supp.zip]

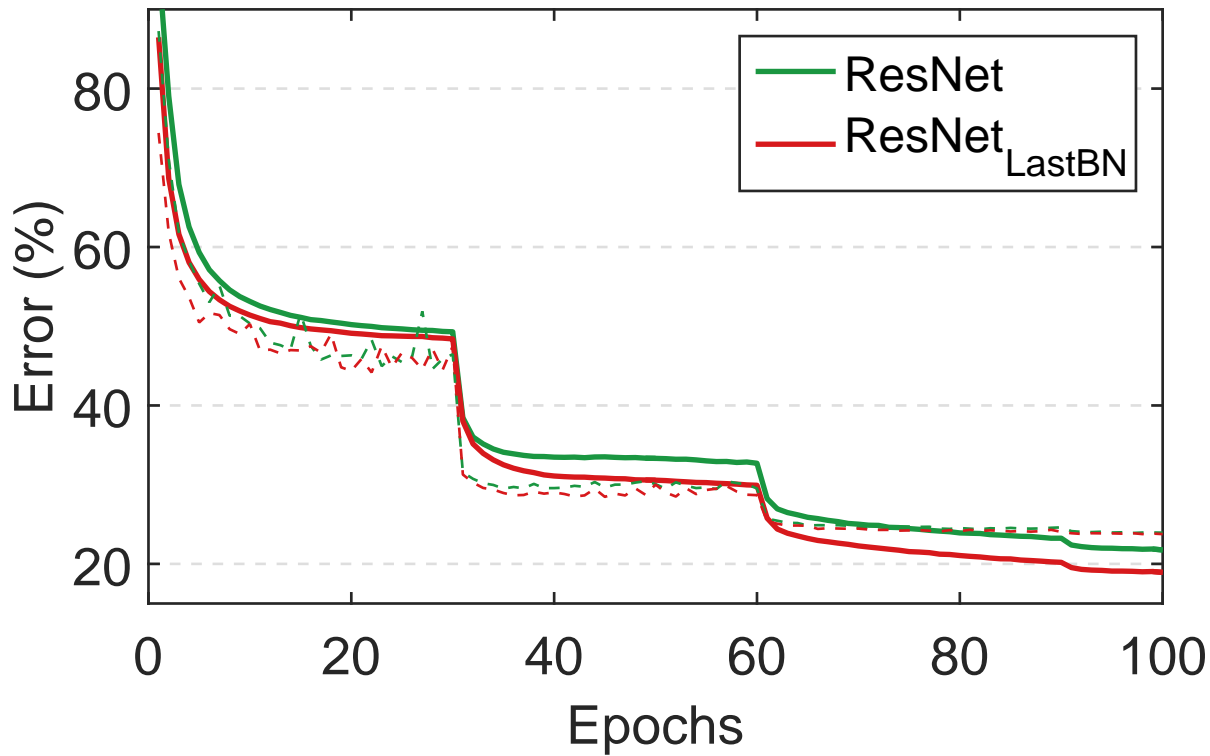

Supplement: Supplementary file 214 [file 123470375-supp.zip]

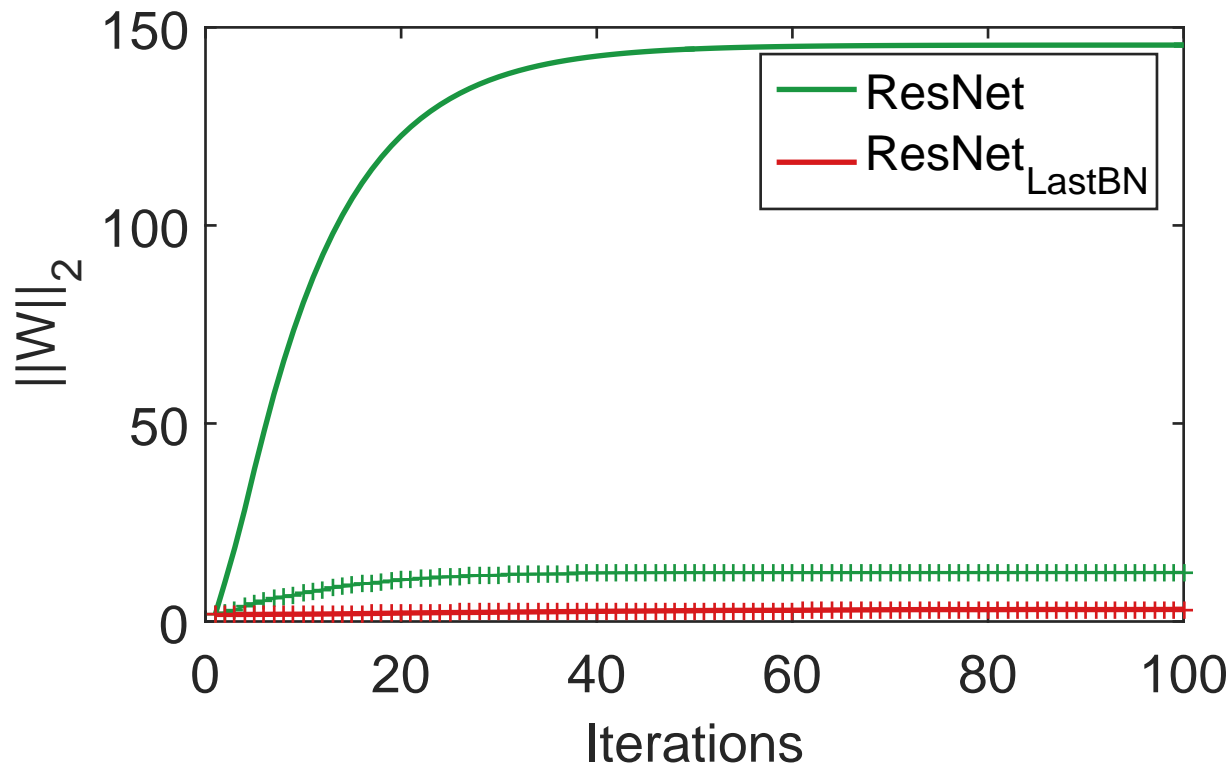

Supplement: Supplementary file 215 [file 123470375-supp.zip]

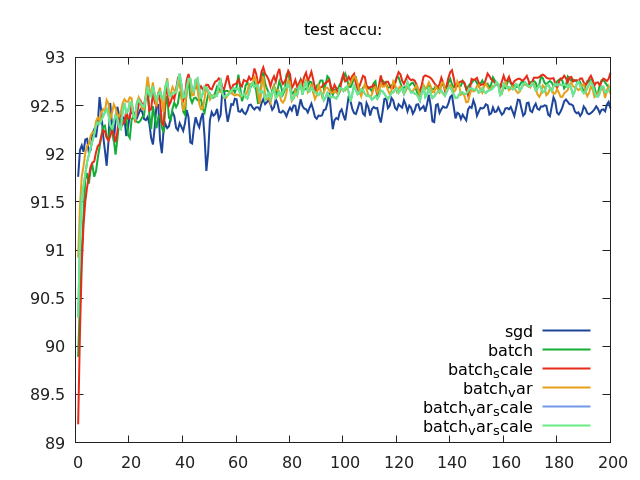

Supplement: Supplementary file 216 [file 123470375-supp.zip › 3482-sup/0-paper/figures/2Stochasity/1LR_test.png]

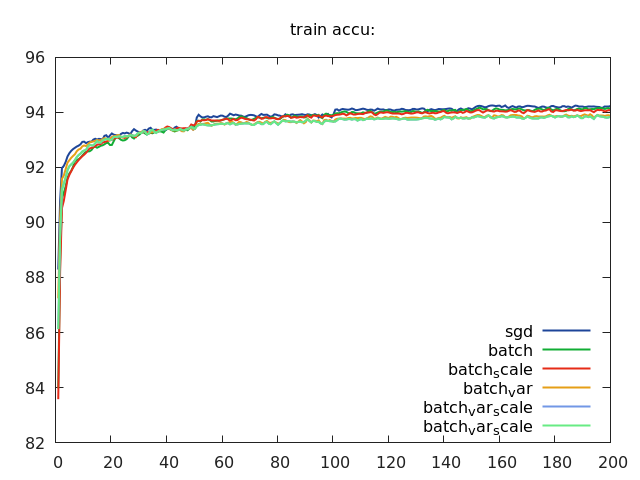

Supplement: Supplementary file 216 [file 123470375-supp.zip › 3482-sup/0-paper/figures/2Stochasity/1LR_train.png]

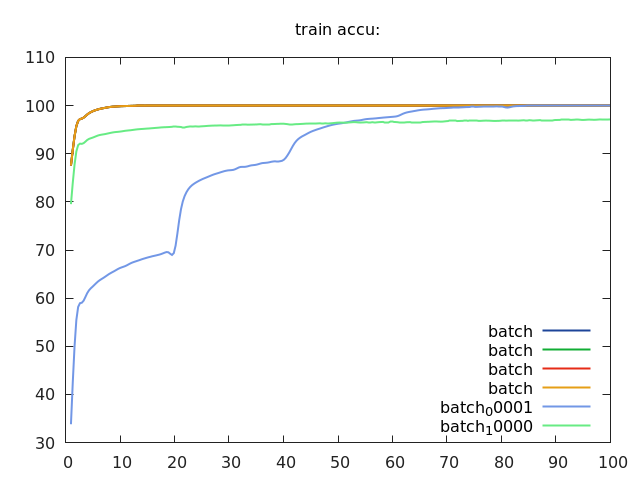

Supplement: Supplementary file 216 [file 123470375-supp.zip › 3482-sup/0-paper/figures/OpenOne/figure_MLP_trainAccu_lr0.1_d1024_5_RandInit_nl2_.png]

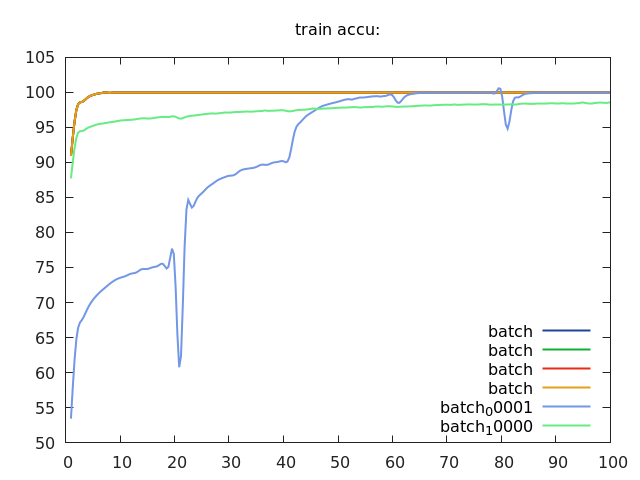

Supplement: Supplementary file 216 [file 123470375-supp.zip › 3482-sup/0-paper/figures/OpenOne/figure_MLP_trainAccu_lr0.5_d1024_5_RandInit_nl2_.png]

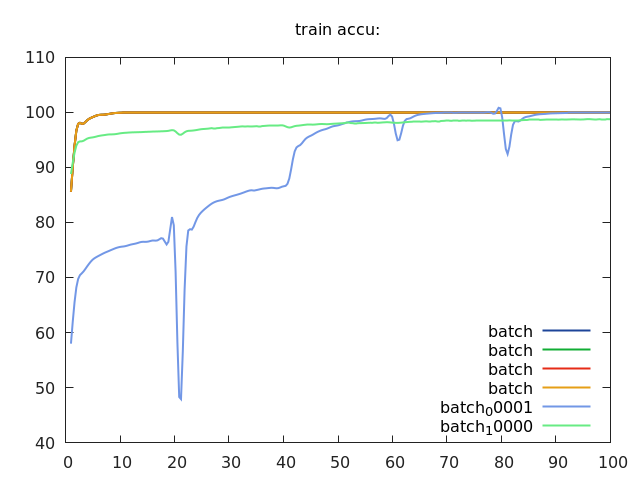

Supplement: Supplementary file 216 [file 123470375-supp.zip › 3482-sup/0-paper/figures/OpenOne/figure_MLP_trainAccu_lr1_d1024_5_RandInit_nl2_.png]

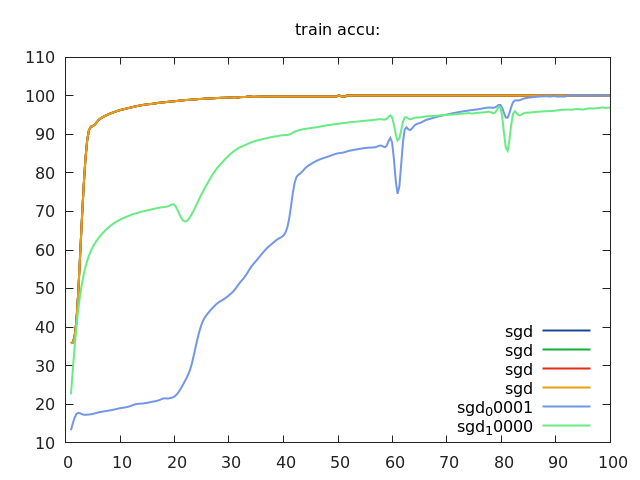

Supplement: Supplementary file 216 [file 123470375-supp.zip › 3482-sup/0-paper/figures/control/sgd/figure_MLP_trainAccu_lr0.1_d1024_5_RandInit_nl2_.png]
